# Supplementary material
Source: PubMed Central journal article supplement (PMC9117393)
Supplement: NIHMS1750706-supplement-Complete_SI.pdf [file NIHMS1750706-supplement-Complete_SI.pdf]

## Supplementary Information

### **Programmable deletion, replacement, integration, and inversion of large DNA sequences with twin prime editing**

Andrew V. Anzalone, Xin D. Gao, Christopher J. Podracky, Andrew T. Nelson, Luke W. Koblan, Aditya Raguram, Jonathan M. Levy, Jaron A. M. Mercer and David R. Liu

|                                                                                                              | Page # |
|--------------------------------------------------------------------------------------------------------------|--------|
| <b>Supplementary Table 1.</b> Sequences of pegRNAs and sgRNAs used in mammalian cell experiments             | 2      |
| <b>Supplementary Table 2.</b> Sequences of primers used for mammalian cell genomic DNA amplification and HTS | 16     |
| <b>Supplementary Table 3.</b> Sequences of primers and probes used for ddPCR assays                          | 19     |
| <b>Supplementary Table 4.</b> Sequence of recoded exonic <i>PAH</i> sequences                                | 20     |
| <b>Supplementary Table 5.</b> TwinPE-mediated off-target genome editing                                      | 21     |
| <b>Supplementary Note 1.</b> Analysis of editing quantification                                              | 22     |
| <b>Supplementary Note 2.</b> Representative plot of FACS gating for GFP reporter assay                       | 24     |
| <b>Supplementary Note 3.</b> Analysis of twinPE design principles                                            | 25     |
| <b>Supplementary Note 4.</b> Discussion of other targeted integration methods                                | 27     |
| <b>Supplementary Sequences 1.</b> Sequences of plasmid donor DNA harboring Bxb1 recombination sites          | 28     |
| <b>Supplementary Sequence 2.</b> Sequence of codon-optimized Bxb1 plasmid                                    | 36     |
| <b>Supplementary Sequence 3.</b> Sequences of the lentiviral GFP reporter vector                             | 38     |
| <b>Supplementary References</b>                                                                              | 41     |

## Supplementary Table 1: Sequences of pegRNAs and sgRNAs used in mammalian cell experiments

All sequences are shown in 5' to 3' orientation. pegRNAs are a concatenation of the spacer sequence, the sgRNA scaffold, and the 3' extension (contains PBS and RT template, and a 3' motif in the case of epegRNAs).

sgRNA scaffold sequence (5' to 3')

gttttagagctagaaatagcaagttaaaataaggctagtcctgtatcaacttgaaaaagtggcaccgagtcggtgc

**Figure 1c**  
pegRNA

| pegRNA         | spacer sequence      | 3' extension                                            | Edits made by the specified pegRNA |
|----------------|----------------------|---------------------------------------------------------|------------------------------------|
| HEK3_attB_A_38 | ggcccagactgagcacgtga | atgatcctgacgacggagaccgctcgtcgacaagcccgtgctcagtctg       | indicated on the x-axis            |
| HEK3_attB_A_34 | ggcccagactgagcacgtga | tcctgacgacggagaccgctcgtcgacaagcccgtgctcagtctg           | indicated on the x-axis            |
| HEK3_attB_A_30 | ggcccagactgagcacgtga | gacgacggagaccgctcgtcgacaagcccgtgctcagtctg               | indicated on the x-axis            |
| HEK3_attB_B_38 | gtcaaccagatcccgggtgc | ggctgttcgacgacggcggtcctccgtcgcaggatcatccgggatactgg      | indicated on the x-axis            |
| HEK3_attB_B_34 | gtcaaccagatcccgggtgc | tgtcgacgacggcggtcctccgtcgcaggatcatccgggatactgg          | indicated on the x-axis            |
| HEK3_attB_B_30 | gtcaaccagatcccgggtgc | gacgacggcggtcctccgtcgcaggatcatccgggatactgg              | indicated on the x-axis            |
| HEK3_attP_A_43 | ggcccagactgagcacgtga | taccgtacaccactgagaccgctggttgaccagacaaacctcgtcctcagtctg  | indicated on the x-axis            |
| HEK3_attP_A_39 | ggcccagactgagcacgtga | gtacaccactgagaccgctggttgaccagacaaacctcgtcctcagtctg      | indicated on the x-axis            |
| HEK3_attP_A_35 | ggcccagactgagcacgtga | accactgagaccgctggttgaccagacaaacctcgtcctcagtctg          | indicated on the x-axis            |
| HEK3_attP_B_44 | gtcaaccagatcccgggtgc | gtctgttcaaccaccgctcctcagtgtgtacgggtacaaacctccgggatactgg | indicated on the x-axis            |
| HEK3_attP_B_40 | gtcaaccagatcccgggtgc | gggtcaaccaccgctcctcagtgtgtacgggtacaaacctccgggatactgg    | indicated on the x-axis            |
| HEK3_attP_B_36 | gtcaaccagatcccgggtgc | aaccaccgctcctcagtgtgtacgggtacaaacctccgggatactgg         | indicated on the x-axis            |

**Figure 2b**  
pegRNA

| pegRNA                       | spacer sequence      | 3' extension                                              | Edits made by the specified pegRNA |
|------------------------------|----------------------|-----------------------------------------------------------|------------------------------------|
| PE3_HEK3_FKBP_ins12 bp       | ggcccagactgagcacgtga | tggaggaagcagggtctcttctctgccatcacacctgcaactcccgtgctcagtctg | indicated on the x-axis            |
| PE3_HEK3_FKBP_ins36 bp       | ggcccagactgagcacgtga | tggaggaagcagggtctcttctctgccatcacacctgctcctgggagatggtttcc  | indicated on the x-axis            |
| PE3_HEK3_FKBP_ins10 8bp      | ggcccagactgagcacgtga | acctgcaactcccgtgctcagtctg                                 | indicated on the x-axis            |
| twinPE_HEK3_FKBP_in s108bp_A | ggcccagactgagcacgtga | tggaggaagcagggtctcttctctgccatcaaaaatttctccatcttcaagcatccc | indicated on the x-axis            |
| twinPE_HEK3_FKBP_in s108bp_B | gtcaaccagatcccgggtgc | ggtgtgtgacaccgcaggtctggccgcttgggaaggtgcgccctctcctg        | indicated on the x-axis            |
| sgRNA                        | spacer sequence      | ggagatggtttccacctgcaactcccgtcctcagtctg                    | indicated on the x-axis            |
| HEK3_3b_+90_nicking          | gtcaaccagatcccgggtgc | accacgcaggtctgcccgccttgggaaggtgcgccctctcctgggagatggtt     | indicated on the x-axis            |
|                              |                      | tccacctgcaactcccgtgctcagtctg                              | indicated on the x-axis            |
|                              |                      | accttcccgaagcgcggcagacctgctggtgctcactacaccgggatgcttgaagat | indicated on the x-axis            |
|                              |                      | ggaaagaatttccgggatactgg                                   |                                    |

**Figure 2c**  
pegRNA

| pegRNA               | spacer sequence      | 3' extension                                                  | Edits made by the specified pegRNA           |
|----------------------|----------------------|---------------------------------------------------------------|----------------------------------------------|
| PAH_E4.2_45          | gcccagaaccattcaagagc | gttcgctcctgtaggacaagattgattagcgaacctatcaagttctgaatggttc       | exon 4 24-bp overlap (64 bp recoded)         |
| PAH_E4.4_43          | gtacgggcatggactcaca  | aaatctgtctctacggagccgaactgacgctgatcatcctgtgagtcctatggcc       | exon 4 24-bp overlap (64 bp recoded)         |
| PAH_E4.2_45_EvoPreQ1 | gcccagaaccattcaagagc | gttcgctcctgtaggacaagattgattagcgaacctatcaagttctgaatggttctctc   | exon 4 24-bp overlap epegRNA (64 bp recoded) |
| PAH_E4.4_43_EvoPreQ1 | gtacgggcatggactcaca  | ctctgtacgcggttctatctagttacgcgtaaaccaactagaaa                  | exon 4 24-bp overlap epegRNA (64 bp recoded) |
| PAH_E4.2_50          | gcccagaaccattcaagagc | aaatctgtctctacggagccgaactgacgctgatcatcctgtgagtcctatggcc       | exon 4 36-bp overlap (64 bp recoded)         |
| PAH_E4.4_50          | gtacgggcatggactcaca  | ctctgtacgcggttctatctagttacgcgtaaaccaactagaaa                  | exon 4 36-bp overlap (64 bp recoded)         |
| PAH_E4.2_50_EvoPreQ1 | gcccagaaccattcaagagc | gtcaagttcgtcctcctgtaggacaagattgattagcgaacctatcaagttctgaatggtt | exon 4 36-bp overlap epegRNA (64 bp recoded) |
| PAH_E4.4_50_EvoPreQ1 | gtacgggcatggactcaca  | c                                                             | exon 4 36-bp overlap (64 bp recoded)         |
| PAH_E4.2_50_EvoPreQ1 | gcccagaaccattcaagagc | gtaaatcaaatctgtctctacggagccgaactgacgctgatcatcctgtgagtcctatgg  | exon 4 36-bp overlap epegRNA (64 bp recoded) |
| PAH_E4.4_50_EvoPreQ1 | gtacgggcatggactcaca  | cc                                                            | exon 4 36-bp overlap epegRNA (64 bp recoded) |
| PAH_E4.2_62          | gcccagaaccattcaagagc | gtcaagttcgtcctcctgtaggacaagattgattagcgaacctatcaagttctgaatggtt | exon 4 36-bp overlap epegRNA (64 bp recoded) |
| PAH_E4.4_61          | gtacgggcatggactcaca  | ctctctctctgtacgcggttctatctagttacgcgtaaaccaactagaaa            | exon 4 36-bp overlap epegRNA (64 bp recoded) |
| PAH_E4.2_62_EvoPreQ1 | gcccagaaccattcaagagc | gtaaatcaaatctgtctctacggagccgaactgacgctgatcatcctgtgagtcctatgg  | exon 4 36-bp overlap epegRNA (64 bp recoded) |
| PAH_E4.4_61_EvoPreQ1 | gtacgggcatggactcaca  | cctctctctgtacgcggttctatctagttacgcgtaaaccaactagaaa             | exon 4 36-bp overlap epegRNA (64 bp recoded) |
|                      |                      | aggatgatcagcgtcaagttcggctcctgtaggacaagattgattagcgaacctatcaa   | exon 4 36-bp overlap epegRNA (64 bp recoded) |
|                      |                      | gttctgaatggttc                                                | exon 4 36-bp overlap epegRNA (64 bp recoded) |
|                      |                      | ttgatggttcgtaaatcaaatctgtctctacggagccgaactgacgctgatcatcctgt   | exon 4 36-bp overlap epegRNA (64 bp recoded) |
|                      |                      | gagtcctatggcc                                                 | exon 4 36-bp overlap epegRNA (64 bp recoded) |
|                      |                      | aggatgatcagcgtcaagttcggctcctgtaggacaagattgattagcgaacctatcaa   | exon 4 36-bp overlap epegRNA (64 bp recoded) |
|                      |                      | gttctgaatggttcctctctctgtctctacggagccgaactgacgctgatcatcctgt    | exon 4 36-bp overlap epegRNA (64 bp recoded) |
|                      |                      | aa                                                            | exon 4 36-bp overlap epegRNA (64 bp recoded) |
|                      |                      | ttgatggttcgtaaatcaaatctgtctctacggagccgaactgacgctgatcatcctgt   | exon 4 36-bp overlap epegRNA (64 bp recoded) |
|                      |                      | gagtcctatggccctctctctgtctctacggagccgaactgacgctgatcatcctgt     | exon 4 36-bp overlap epegRNA (64 bp recoded) |
|                      |                      | a                                                             | exon 4 36-bp overlap epegRNA (64 bp recoded) |

|                      |                        |                                                                                                                   |                                                                                            |
|----------------------|------------------------|-------------------------------------------------------------------------------------------------------------------|--------------------------------------------------------------------------------------------|
| PAH_E7.2_34          | gtggtttccgctccgacctg   | agaaagtcttactgctcaagagcccggcaacgggtcggaggcg                                                                       | exon 7 22-bp overlap (46 bp recoded)                                                       |
| PAH_E7.5_34          | gagtggaagactcgggaaggcc | tcttgagcagtagagactttctgggggtctcgccttccgagtcttc                                                                    | exon 7 22-bp overlap (46 bp recoded)                                                       |
| PAH_E7.2_34_EvoPreQ1 | gtggtttccgctccgacctg   | agaaagtcttactgctcaagagcccggcaacgggtcggaggcgctctctcttgcagcggttctatctagtacgcgttaaaccaactagaaaa                      | exon 7 22-bp overlap epegRNA (46 bp recoded)                                               |
| PAH_E7.5_34_EvoPreQ1 | gagtggaagactcgggaaggcc | tcttgagcagtagagactttctgggggtctcgccttccgagtctctctcttgcagcggttctatctagtacgcgttaaaccaactagaaaa                       | exon 7 22-bp overlap epegRNA (46 bp recoded)                                               |
| PAH_E7.2_44          | gtggtttccgctccgacctg   | gagacccccagaaagtcttactgctcaagagcccggcaacgggtcggaggcg                                                              | exon 7 42-bp overlap (46 bp recoded), exon 7 24-bp overlap (64 bp recoded)                 |
| PAH_E7.5_44          | gagtggaagactcgggaaggcc | gtfgccgggtccttgagcagtagagactttctgggggtctcgccttccgagtcttc                                                          | exon 7 42-bp overlap (46 bp recoded)                                                       |
| PAH_E7.2_44_EvoPreQ1 | gtggtttccgctccgacctg   | gagacccccagaaagtcttactgctcaagagcccggcaacgggtcggaggcgctctcttgcagcggttctatctagtacgcgttaaaccaactagaaaa               | exon 7 42-bp overlap epegRNA (46 bp recoded), exon 7 24-bp overlap epegRNA (64 bp recoded) |
| PAH_E7.5_44_EvoPreQ1 | gagtggaagactcgggaaggcc | gtfgccgggtccttgagcagtagagactttctgggggtctcgccttccgagtctctctcttgcagcggttctatctagtacgcgttaaaccaactagaaaa             | exon 7 42-bp overlap epegRNA (46 bp recoded)                                               |
| PAH_E7.6_44          | gtctgatgtactgtgtgcag   | agttagagactttctgggggtctcgcattccgctgtttcattgcacacagtacatctctcttgacgcggttctatctagtacgcgttaaaccaactagaaaa            | exon 7 24-bp overlap (64 bp recoded)                                                       |
| PAH_E7.6_44_EvoPreQ1 | gtctgatgtactgtgtgcag   | agttagagactttctgggggtctcgcattccgctgtttcattgcacacagtacatctctcttgacgcggttctatctagtacgcgttaaaccaactagaaaa            | exon 7 24-bp overlap epegRNA (64 bp recoded)                                               |
| PAH_E7.2_55          | gtggtttccgctccgacctg   | acgcggaatgcagagacccccagaaagtcttactgctcaagagcccggcaacgggtcggaggcg                                                  | exon 7 47-bp overlap (64 bp recoded)                                                       |
| PAH_E7.6_56          | gtctgatgtactgtgtgcag   | gggctcttgagcagtagagactttctgggggtctcgcattccgctgtttcattgcacacagtata                                                 | exon 7 47-bp overlap (64 bp recoded)                                                       |
| PAH_E7.2_55_EvoPreQ1 | gtggtttccgctccgacctg   | acgcggaatgcagagacccccagaaagtcttactgctcaagagcccggcaacgggtcggaggcgctctctcttgcagcggttctatctagtacgcgttaaaccaactagaaaa | exon 7 47-bp overlap epegRNA (64 bp recoded)                                               |
| PAH_E7.6_56_EvoPreQ1 | gtctgatgtactgtgtgcag   | gggctcttgagcagtagagactttctgggggtctcgcattccgctgtttcattgcacacagtatactctcttgcagcggttctatctagtacgcgttaaaccaactagaaaa  | exon 7 47-bp overlap epegRNA (64 bp recoded)                                               |

**Figure 2e**  
**pegRNA**

|                               | spacer sequence      | 3' extension                                                                               | Edits made by the specified pegRNA |
|-------------------------------|----------------------|--------------------------------------------------------------------------------------------|------------------------------------|
| HEK3_DF_A_SA_del77nt          | ggcccagactgagcacgtga | tcctctgccatcacgtgctcagtctg                                                                 | SA (Δ 77nt)                        |
| HEK3_DF_B_SA_del77nt          | gtcaaccagatcccgggtgc | tgatggcagagaccgggatactgg                                                                   | SA (Δ 77nt)                        |
| HEK3_DF_A_SA_del56nt          | ggcccagactgagcacgtga | tggaggaaagcagggtctcttctctgccatcacgtgctcagtctg                                              | SA (Δ 56nt)                        |
| HEK3_DF_B_SA_del56nt          | gtcaaccagatcccgggtgc | tgatggcagagaaaggaagccctctctccaccgggatactgg                                                 | SA (Δ 56nt)                        |
| HEK3_DF_A_HA_del64nt          | ggcccagactgagcacgtga | tcaggagctgcatcctctgccatcacgtgctcagtctg                                                     | HA (Δ 64nt)                        |
| HEK3_DF_B_HA_del64nt          | gtcaaccagatcccgggtgc | tgatggcagagatgagcagctctcaccgggatactgg                                                      | HA (Δ 64nt)                        |
| HEK3_DF_A_PD_del90nt          | ggcccagactgagcacgtga | gcccagccaaactgtcaaccagatcccggcgtgctcagtctg                                                 | PD (Δ 90nt)                        |
| HEK3_DF_B_PD_del90nt          | gtcaaccagatcccgggtgc | gggtcaatccttggggcccagactgagcacggggatactgg                                                  | PD (Δ 90nt)                        |
| HEK3_DF_A_SA_del77nt_EvoPreQ1 | ggcccagactgagcacgtga | tcctctgccatcacgtgctcagtctgttaataacgcggttctatctagtacgcgttaaaccaactagaaa                     | SA-EvoPreQ1 (Δ 77nt)               |
| HEK3_DF_B_SA_del77nt_EvoPreQ1 | gtcaaccagatcccgggtgc | tgatggcagagaccgggatactgaaaataacgcggttctatctagtacgcgttaaaccaactagaaa                        | SA-EvoPreQ1 (Δ 77nt)               |
| HEK3_DF_A_SA_del56nt_EvoPreQ1 | ggcccagactgagcacgtga | tggaggaaagcagggtctcttctctgccatcacgtgctcagtctgttaataatcgcggttctatctagtacgcgttaaaccaactagaaa | SA-EvoPreQ1 (Δ 56nt)               |
| HEK3_DF_B_SA_del56nt_EvoPreQ1 | gtcaaccagatcccgggtgc | tgatggcagagaaaggaagccctctctccaccgggatactgaaaaaaacgcggttctatctagtacgcgttaaaccaactagaaa      | SA-EvoPreQ1 (Δ 56nt)               |
| HEK3_DF_A_HA_del64nt_EvoPreQ1 | ggcccagactgagcacgtga | tcaggagctgcatcctctgccatcacgtgctcagtctgataataacgcggttctatctagtacgcgttaaaccaactagaaa         | SA-EvoPreQ1 (Δ 64nt)               |
| HEK3_DF_B_HA_del64nt_EvoPreQ1 | gtcaaccagatcccgggtgc | tgatggcagagatgagcagctctcaccgggatactgaaaaaaagcgcggttctatctagtacgcgttaaaccaactagaaa          | SA-EvoPreQ1 (Δ 64nt)               |
| HEK3_DF_A_PD_del90nt_EvoPreQ1 | ggcccagactgagcacgtga | gcccagccaaactgtcaaccagatcccggcgtgctcagtctgttaataacgcggttctatctagtacgcgttaaaccaactagaaa     | PD-EvoPreQ1 (Δ 90nt)               |
| HEK3_DF_B_PD_del90nt_EvoPreQ1 | gtcaaccagatcccgggtgc | gggtcaatccttggggcccagactgagcacggggatactgaaaaaatcgcggttctatctagtacgcgttaaaccaactagaaa       | PD-EvoPreQ1 (Δ 90nt)               |

**Figure 2f**  
**pegRNA**

|                       | spacer sequence      | 3' extension                                     | Edits made by the specified pegRNA |
|-----------------------|----------------------|--------------------------------------------------|------------------------------------|
| DMD-Exon51-A1_a_SA    | gattgctttgattcccta   | ttgaataggaagtaaatatttgaagctggaccctagggaaatcaa    | SA-1 (Δ 780nt)                     |
| DMD-Exon51-B1_A1_b_SA | gcagttgcctaagaactggt | tagggctccagctcaaaatatttacttctctattcaaaagtcttaggc | SA-1 (Δ 780nt)                     |
| DMD-Exon51-a3-b1_a_PD | gtatatgattgtactgaga  | tgctgagagagaacagttgcctaaagactcagtaacaa           | PD-1 (Δ 627nt); PD-2 (Δ 627nt)     |

|                           |                        |                                                       |                                                                                        |
|---------------------------|------------------------|-------------------------------------------------------|----------------------------------------------------------------------------------------|
| DMD-Exon51-b1-a3_a-<br>PD | gcagttgcctaagaactggt   | accacttcccaaatgtatatgattgttactgagttcttagg             | PD-1 (Δ 627nt)                                                                         |
| DMD-Exon51-b1-a3_b-<br>PD | gcagttgcctaagaactggt   | accacttcccaaatgtatatgattgttactgagttcttaggcaa          | PD-2 (Δ 627nt)                                                                         |
| DMD-Exon51-A3_b_attB      | gtatatgattgttactgaga   | atgatcctgacgacggagaccgccgtcgtcgacaagcccagtaacaate     | tPE-1 attB (Δ 589nt); tPE-2 attB (Δ 589nt); tPE-1 attB (Δ 558nt); tPE-2 attB (Δ 558nt) |
| DMD-Exon51-A3_c_attB      | gtatatgattgttactgaga   | atgatcctgacgacggagaccgccgtcgtcgacaagcccagtaacaatcata  | tPE-3 attB (Δ 589nt); tPE-4 attB (Δ 589nt); tPE-3 attB (Δ 558nt); tPE-4 attB (Δ 558nt) |
| DMD-Exon51-B1_b_attB      | gcagttgcctaagaactggt   | ggctgtgacgacgacggcgtctccgtcgtcaggatcatagttcttaggc     | tPE-1 attB (Δ 589nt); tPE-3 attB (Δ 589nt)                                             |
| DMD-Exon51-B1_c_attB      | gcagttgcctaagaactggt   | ggctgtgacgacgacggcgtctccgtcgtcaggatcatagttcttaggcaac  | tPE-2 attB (Δ 589nt); tPE-4 attB (Δ 589nt)                                             |
| DMD-Exon51-B2_b_attB      | gaggagagtaaaagtattgg   | ggctgtgacgacgacggcgtctccgtcgtcaggatcatatcactttactc    | tPE-1 attB (Δ 558nt); tPE-3 attB (Δ 558nt)                                             |
| DMD-Exon51-B2_c_attB      | gaggagagtaaaagtattgg   | ggctgtgacgacgacggcgtctccgtcgtcaggatcatatcactttactctcc | tPE-2 attB (Δ 558nt); tPE-4 attB (Δ 558nt)                                             |
| <b>sgRNA</b>              | <b>spacer sequence</b> |                                                       | <b>Edits made by the paired sgRNA</b>                                                  |
| DMD-Exon51-A1             | gattggtttgattcccta     |                                                       | Cas9 (Δ 818nt)                                                                         |
| DMD-Exon51-A3             | gtatatgattgttactgaga   |                                                       | Cas9 (Δ 627nt)                                                                         |
| DMD-Exon51-B1             | gcagttgcctaagaactggt   |                                                       | Cas9 (Δ 818nt); Cas9 (Δ 627nt)                                                         |

**Figure 3b**  
**pegRNA**

|            | spacer sequence         | 3' extension                                         | Edits made by the specified pegRNA |
|------------|-------------------------|------------------------------------------------------|------------------------------------|
| CCR5_A223c | gtcatcctgataaactgcaaa   | atgatcctgacgacggagaccgccgtcgtcgacaagccgcagttatcagg   | indicated on the x-axis            |
| CCR5_B272a | gaaggaaaaacaggtcagaga   | ggctgtgacgacgacggcgtctccgtcgtcaggatcatctgacctg       | indicated on the x-axis            |
| CCR5_B291b | gcccagaaggacagtaaga     | ggctgtgacgacgacggcgtctccgtcgtcaggatcattactgtccct     | indicated on the x-axis            |
| CCR5_B305a | ggcagcatagtggcccaga     | ggctgtgacgacgacggcgtctccgtcgtcaggatcatgggctcact      | indicated on the x-axis            |
| CCR5_B326b | gatttccaaagtcaccaactggg | ggctgtgacgacgacggcgtctccgtcgtcaggatcatagtgaggactttg  | indicated on the x-axis            |
| CCR5_B330b | gttgattttccaaagtcccac   | ggctgtgacgacgacggcgtctccgtcgtcaggatcatggactttggaa    | indicated on the x-axis            |
| CCR5_A260c | gtgacatctactgctcaacc    | atgatcctgacgacggagaccgccgtcgtcgacaagccctgacaggtagat  | indicated on the x-axis            |
| CCR5_B305c | ggcagcatagtggcccaga     | ggctgtgacgacgacggcgtctccgtcgtcaggatcatggcctcactatgc  | indicated on the x-axis            |
| CCR5_B330c | gttgattttccaaagtcccac   | ggctgtgacgacgacggcgtctccgtcgtcaggatcatggactttggaaat  | indicated on the x-axis            |
| CCR5_A325b | gtcactatgctgcccaccag    | atgatcctgacgacggagaccgccgtcgtcgacaagccgcccagcat      | indicated on the x-axis            |
| CCR5_B414a | ggtacatctgattgtcagg     | ggctgtgacgacgacggcgtctccgtcgtcaggatcatgacaatcga      | indicated on the x-axis            |
| CCR5_A360b | gacaagtgtcaactcttgac    | atgatcctgacgacggagaccgccgtcgtcgacaagcccaaggttgacac   | indicated on the x-axis            |
| CCR5_A506c | gacaagtgtgatcacttggg    | atgatcctgacgacggagaccgccgtcgtcgacaagcccaaggtgatcactt | indicated on the x-axis            |
| CCR5_B584a | gtatgaaaaatgagagctgc    | ggctgtgacgacgacggcgtctccgtcgtcaggatcatgctctcatt      | indicated on the x-axis            |
| CCR5_A509a | gaagtgtgatcacttgggtgg   | atgatcctgacgacggagaccgccgtcgtcgacaagcccaaggtga       | indicated on the x-axis            |
| CCR5_B535c | gattctgtaaaagatgattcc   | ggctgtgacgacgacggcgtctccgtcgtcaggatcatatctttaccag    | indicated on the x-axis            |
| CCR5_A531c | gctgtgtttgctctctccc     | atgatcctgacgacggagaccgccgtcgtcgacaagccagagacgacaaac  | indicated on the x-axis            |
| CCR5_B584b | gtatgaaaaatgagagctgc    | ggctgtgacgacgacggcgtctccgtcgtcaggatcatgctctcattttc   | indicated on the x-axis            |

**Figure 3c**  
**pegRNA**

|              | spacer sequence       | 3' extension                                             | Edits made by the specified pegRNA |
|--------------|-----------------------|----------------------------------------------------------|------------------------------------|
| AAVS1_A1077b | gcagagccaggaaccctgt   | taccgtacaccactgagaccgcggtgtgtgaccagacaaacctggggtctctgg   | indicated on the x-axis            |
| AAVS1_B1154b | gtccttggcaagcccaggag  | gtctgtgtaaccaccgcggtctcagtggtgtacggtaacaaacctctggcttccc  | indicated on the x-axis            |
| AAVS1_A1098b | gggaagggcagagagacca   | taccgtacaccactgagaccgcggtgtgtgaccagacaaacctctctctccc     | indicated on the x-axis            |
| AAVS1_B1154a | gtccttggcaagcccaggag  | gtctgtgtaaccaccgcggtctcagtggtgtacggtaacaaacctctggcttccc  | indicated on the x-axis            |
| AAVS1_A1246c | gaatatgtcccagatagcac  | taccgtacaccactgagaccgcggtgtgtgaccagacaaacctctctctgggacat | indicated on the x-axis            |
| AAVS1_B1314b | gtgctgtcctaggtttcacc  | gtctgtgtaaccaccgcggtctcagtggtgtacggtaacaaacctgaacacctagg | indicated on the x-axis            |
| AAVS1_B1376a | gtcctgtcagggctgtgtgtg | gtctgtgtaaccaccgcggtctcagtggtgtacggtaacaaacctcacagccct   | indicated on the x-axis            |
| AAVS1_A1267c | ggggactcttaagaaaaga   | taccgtacaccactgagaccgcggtgtgtgaccagacaaacctctccctttc     | indicated on the x-axis            |
| AAVS1_A1293a | gagaagagaaaaggagtag   | taccgtacaccactgagaccgcggtgtgtgaccagacaaacctctccctttc     | indicated on the x-axis            |
| AAVS1_A1307b | gagtagagcggcccaccagc  | taccgtacaccactgagaccgcggtgtgtgaccagacaaacctctggtcccct    | indicated on the x-axis            |
| AAVS1_B1314a | gtgctgtcctaggtttcacc  | gtctgtgtaaccaccgcggtctcagtggtgtacggtaacaaacctgaacacctta  | indicated on the x-axis            |
| AAVS1_A1582c | gatcagtgaaccgaccaga   | taccgtacaccactgagaccgcggtgtgtgaccagacaaacctggtgctttcact  | indicated on the x-axis            |
| AAVS1_B1640a | gtgacctgcccgttctcag   | gtctgtgtaaccaccgcggtctcagtggtgtacggtaacaaacctagaaccggg   | indicated on the x-axis            |
| AAVS1_B1676a | gagcttggcaggggtgtgga  | gtctgtgtaaccaccgcggtctcagtggtgtacggtaacaaacctaccacctc    | indicated on the x-axis            |
| AAVS1_B1701a | gagccagagagatcctggg   | gtctgtgtaaccaccgcggtctcagtggtgtacggtaacaaacctagatcctc    | indicated on the x-axis            |
| AAVS1_B1705b | gatggagccagagagatcc   | gtctgtgtaaccaccgcggtctcagtggtgtacggtaacaaacctctctctgtgc  | indicated on the x-axis            |
| AAVS1_A1615b | gcagctcaggttctgggaga  | taccgtacaccactgagaccgcggtgtgtgaccagacaaacctcccagaacctg   | indicated on the x-axis            |
| AAVS1_B1640a | gtgacctgcccgttctcag   | gtctgtgtaaccaccgcggtctcagtggtgtacggtaacaaacctgagaccggg   | indicated on the x-axis            |
| AAVS1_A1615a | gcagctcaggttctgggaga  | taccgtacaccactgagaccgcggtgtgtgaccagacaaacctcccagaacc     | indicated on the x-axis            |
| AAVS1_B1676a | gagcttggcaggggtgtgga  | gtctgtgtaaccaccgcggtctcagtggtgtacggtaacaaacctaccacctg    | indicated on the x-axis            |
| AAVS1_A1647b | gtggccactgagaaccgggc  | taccgtacaccactgagaccgcggtgtgtgaccagacaaacctggttctcag     | indicated on the x-axis            |
| AAVS1_B1676b | gtgacctgcccgttctcag   | gtctgtgtaaccaccgcggtctcagtggtgtacggtaacaaacctaccacctg    | indicated on the x-axis            |
| AAVS1_B1701a | gagccagagagatcctggg   | gtctgtgtaaccaccgcggtctcagtggtgtacggtaacaaacctagatcctc    | indicated on the x-axis            |
| AAVS1_B1705a | gatggagccagagagatcc   | gtctgtgtaaccaccgcggtctcagtggtgtacggtaacaaacctctctctgtgc  | indicated on the x-axis            |
| AAVS1_A1810b | gaatctgctcaacaggaggt  | taccgtacaccactgagaccgcggtgtgtgaccagacaaacctctctgttaggc   | indicated on the x-axis            |
| AAVS1_B1883b | ggggccactaggacagggat  | gtctgtgtaaccaccgcggtctcagtggtgtacggtaacaaacctgtccctagt   | indicated on the x-axis            |

|              |                       |                                                             |                         |
|--------------|-----------------------|-------------------------------------------------------------|-------------------------|
| AAVS1_B1902a | gtccctccaccacagtg     | gtctgtcaaccaccggtgtctcagtggtgtacgggtacaaacctgtgggggtg       | indicated on the x-axis |
| AAVS1_A1890b | gtcacaatctgtccctag    | taccgtacaccactgagaccgcggtgtgtgaccagacaaacctgggacaggatt      | indicated on the x-axis |
| AAVS1_A1890c | gtcacaatctgtccctag    | taccgtacaccactgagaccgcggtgtgtgaccagacaaacctgggacaggattgg    | indicated on the x-axis |
| AAVS1_B1962c | gggaccaccttatattccca  | tctgtgtcaaccaccgcggtgtcagtggtgtacgggtacaaacctgaatataagtggtg | indicated on the x-axis |
| AAVS1_A3786c | gtfggccccaccgccccca   | taccgtacaccactgagaccgcggtgtgtgaccagacaaacctggcggtggggggg    | indicated on the x-axis |
| AAVS1_B3839c | gacctgcccagcacaccctg  | tctgtgtcaaccaccgcggtgtcagtggtgtacgggtacaaacctgtgtgtcgggca   | indicated on the x-axis |
| AAVS1_A3786a | gtfggccccaccgccccca   | taccgtacaccactgagaccgcggtgtgtgaccagacaaacctggcggtggg        | indicated on the x-axis |
| AAVS1_B3903b | gcgactctggaagtggcca   | gtctgtgtcaaccaccgcggtgtcagtggtgtacgggtacaaacctccactccagg    | indicated on the x-axis |
| AAVS1_B3930a | ggacttcccagtggtcatcg  | gtctgtgtcaaccaccgcggtgtcagtggtgtacgggtacaaacctgtcacactg     | indicated on the x-axis |
| AAVS1_A3835b | gacgtcacggcgctgccccca | taccgtacaccactgagaccgcggtgtgtgaccagacaaacctggcagcgcctg      | indicated on the x-axis |
| AAVS1_B3930b | ggacttcccagtggtcatcg  | gtctgtgtcaaccaccgcggtgtcagtggtgtacgggtacaaacctgtcacactg     | indicated on the x-axis |
| AAVS1_A3856a | ggtgtgtctggcgagtgctgc | taccgtacaccactgagaccgcggtgtgtgaccagacaaacctgacctgcc         | indicated on the x-axis |

**Figure 3d**  
**pegRNA**

|              | spacer sequence       | 3' extension                                               | Edits made by the specified pegRNA |
|--------------|-----------------------|------------------------------------------------------------|------------------------------------|
| CCR5_A325a   | gtctactatgtgcccccag   | atgactctgacgacggagaccgctgtcgcacaagccggcgcgacg              | 325/414                            |
| CCR5_B414b   | ggtactatctgattgtcagg  | ggctgtgtcagcagcgggtctccgtcgtcaggatcatgacaatcgata           | 325/414                            |
| CCR5_A506c   | gacaagtgtgatcactggg   | atgactctgacgacggagaccgctgtcgcacaagccagtgatcacactt          | 506/584                            |
| CCR5_A509b   | gaagtgtgatcactgggtgg  | atgactctgacgacggagaccgctgtcgcacaagcccaagtgatc              | 509/584                            |
| CCR5_A531b   | gctgtgtttcgctctcccc   | atgactctgacgacggagaccgctgtcgcacaagccagagacgcaaa            | 531/584                            |
| CCR5_B584b   | gtatggaaaatgagagctgc  | ggctgtgtcagcagcgggtctcctcgtcagatcatgctctcattttc            | 506/584, 509/584, 531/584          |
| AAVS1_A1077c | gcgagaccaggaaccctctg  | taccgtacaccactgagaccgcggtgtgtgaccagacaaacctggggtctcgtgct   | 1077/1154                          |
| AAVS1_B1154c | gtccttggccaagcccaggag | tctgtgtcaaccaccgcggtgtcagtggtgtacgggtacaaacctctgggctgcca   | 1077/1154                          |
| AAVS1_A3786c | gtfggccccaccgccccca   | taccgtacaccactgagaccgcggtgtgtgaccagacaaacctggcggtggggggg   | 3786/3903, 3786/3930               |
| AAVS1_B3903c | gcgactcctggaagtggcca  | tctgtgtcaaccaccgcggtgtcagtggtgtacgggtacaaacctccactccaggag  | 3786/3903                          |
| AAVS1_B3930c | ggacttcccagtggtcatcg  | tctgtgtcaaccaccgcggtgtcagtggtgtacgggtacaaacctgtcacactgggaa | 3786/3930                          |

**Figure 3e**  
**pegRNA**

|                    | spacer sequence      | 3' extension                                                    | Edits made by the specified pegRNA |
|--------------------|----------------------|-----------------------------------------------------------------|------------------------------------|
| CCR5_A531b         | gctgtgtttcgctctcccc  | atgactctgacgacggagaccgctgtcgcacaagccagagacgcaaa                 | attB 38                            |
| CCR5_B584b         | gtatggaaaatgagagctgc | ggctgtgtcagcagcgggtctccgtcgtcaggatcatgctctcattttc               | attB 38                            |
| CCR5_A7_attB_30    | gctgtgtttcgctctcccc  | tctgtacgacggagaccgctgtcgcacaagccagagacgcaaa                     | attB 30                            |
| CCR5_B8_attB_30    | gtatggaaaatgagagctgc | tgtcagcagcggcgtctcctcgtcagatcatgctctcattttc                     | attB 30                            |
| CCR5_A7_attB_20    | gctgtgtttcgctctcccc  | acgacggagaccgctgtcgcacaagccagagacgcaaa                          | attB 20                            |
| CCR5_B8_attB_20    | gtatggaaaatgagagctgc | acgacggcgggtctcctcgtcagatcatgctctcattttc                        | attB 20                            |
| CCR5_A7_attB_GA_38 | gctgtgtttcgctctcccc  | atgactctgacgacggagaccgctgtcgcacaagccagagacgcaaa                 | attB-GA 38                         |
| CCR5_B8_attB_GA_38 | gtatggaaaatgagagctgc | ggctgtgtcagcagcgggactcctcgtcagatcatgctctcattttc                 | attB-GA 38                         |
| CCR5_A7_attB_GA_30 | gctgtgtttcgctctcccc  | tctgtacgacggaggtcctcctcgtcgcacaagccagagacgcaaa                  | attB-GA 30                         |
| CCR5_B8_attB_GA_30 | gtatggaaaatgagagctgc | tgtcagcagcggcggactcctcgtcagatcatgctctcattttc                    | attB-GA 30                         |
| CCR5_A7_attB_GA_20 | gctgtgtttcgctctcccc  | acgacggaggtcctcctcgtcgcacaagccagagacgcaaa                       | attB-GA 20                         |
| CCR5_B8_attB_GA_20 | gtatggaaaatgagagctgc | acgacggcgggactcctcgtcagatcatgctctcattttc                        | attB-GA 20                         |
| CCR5_A7_attP_50    | gctgtgtttcgctctcccc  | gggtttgtaccgtacaccactgagaccgcggtgtgtgaccagacaaaccaagagacgcaaa   | attP 50                            |
| CCR5_B8_attP_50    | gtatggaaaatgagagctgc | tggtttgtctgtgtcaccaccgcggtgtcagtggtgtacgggtacaaacctgctctcattttc | attP 50                            |
| CCR5_A7_attP_40    | gctgtgtttcgctctcccc  | tgtaccgtacaccactgagaccgcggtgtgtgaccagacaaaccaagagacgcaaa        | attP 40                            |
| CCR5_B8_attP_40    | gtatggaaaatgagagctgc | tgtctgtgtcaaccaccggtgtcagtggtgtacgggtacaaacctgctctcattttc       | attP 40                            |
| CCR5_A7_attP_30    | gctgtgtttcgctctcccc  | cgtaaccactgagaccgcggtgtgtgaccagacaaaccaagagacgcaaa              | attP 30                            |
| CCR5_B8_attP_30    | gtatggaaaatgagagctgc | ggtcaaccaccgcggtgtcagtggtgtacgggtacaaacctgctctcattttc           | attP 30                            |
| CCR5_A7_attP_GA_50 | gctgtgtttcgctctcccc  | gggtttgtaccgtacaccactgagaccgcggtgtgtgaccagacaaaccaagagacgcaaa   | attP-GA 50                         |
| CCR5_B8_attP_GA_50 | gtatggaaaatgagagctgc | tggtttgtctgtgtcaccaccgcggtgtcagtggtgtacgggtacaaacctgctctcattttc | attP-GA 50                         |
| CCR5_A7_attP_GA_40 | gctgtgtttcgctctcccc  | tgtaccgtacaccactgagaccgcggtgtgtgaccagacaaaccaagagacgcaaa        | attP-GA 40                         |
| CCR5_B8_attP_GA_40 | gtatggaaaatgagagctgc | tgtctgtgtcaaccaccgcggtgtcagtggtgtacgggtacaaacctgctctcattttc     | attP-GA 40                         |
| CCR5_A7_attP_GA_30 | gctgtgtttcgctctcccc  | cgtaaccactgagaccgcggtgtgtgaccagacaaaccaagagacgcaaa              | attP-GA 30                         |
| CCR5_B8_attP_GA_30 | gtatggaaaatgagagctgc | ggtcaaccaccgcggtgtcagtggtgtacgggtacaaacctgctctcattttc           | attP-GA 30                         |

**Figure 3f**  
**pegRNA**

|            | spacer sequence       | 3' extension                                      | Edits made by the specified pegRNA |
|------------|-----------------------|---------------------------------------------------|------------------------------------|
| CCR5_A277b | gactgaaacttcacagaata  | aacttcacagagcctgtcgcagcagcggcgtctcctcgtcagatcat   | indicated on the x-axis            |
| CCR5_A277c | gactgaaacttcacagaata  | gaaacttcacagagcctgtcgcagcagcggcgtctcctcgtcagatcat | indicated on the x-axis            |
| CCR5_B358b | gatttatgagatcaacagcac | ggcctgtcgcagcagcggcgtctcctcgtcagatcatctgtgatctc   | indicated on the x-axis            |
| CCR5_B358c | gatttatgagatcaacagcac | ggcctgtcgcagcagcggcgtctcctcgtcagatcatctgtgatctcat | indicated on the x-axis            |

**Figure 3g**  
**pegRNA**

|                 | spacer sequence      | 3' extension                                      | Edits made by the specified pegRNA |
|-----------------|----------------------|---------------------------------------------------|------------------------------------|
| CCR5_A7_attB_20 | gctgtgtttcgctctcccc  | acgacggagaccgctgtcgcacaagccagagacgcaaa            | CCR5 attB (HEK293T and Huh7)       |
| CCR5_B8_attB_20 | gtatggaaaatgagagctgc | acgacggcgggtctcctcgtcagatcatgctctcattttc          | CCR5 attB (HEK293T and Huh7)       |
| CCR5_A277c      | gactgaaacttcacagaata | gaaacttcacagagcctgtcgcagcagcggcgtctcctcgtcagatcat | ALB attB (HEK293T and Huh7)        |

|                                                                                              |                        |                                                                                                                                                     |                                                             |
|----------------------------------------------------------------------------------------------|------------------------|-----------------------------------------------------------------------------------------------------------------------------------------------------|-------------------------------------------------------------|
| CCR5_B358c                                                                                   | gatttatgagatcaacagcac  | ggcttgtcgacgacggcggtctccgtcgtcaggatcatctgttgcctcat                                                                                                  | ALB attB (HEK293T and Huh7)                                 |
| <b>Figure 4b</b>                                                                             |                        |                                                                                                                                                     |                                                             |
| <b>pegRNA</b>                                                                                | <b>spacer sequence</b> | <b>3' extension</b>                                                                                                                                 | <b>Edits made by the specified pegRNA</b>                   |
| IDS2_DF_A1_a_attP_rev                                                                        | gacacaaaaactgccacagg   | taccgtacaccactgagaccgcggtgtgaccagacaaacctgtggcagtta                                                                                                 | A1B2 (attP rev)                                             |
| IDS2_DF_A1_a_attP_fwd                                                                        | gacacaaaaactgccacagg   | gctctgtcaaccaccgcggtctcagtggtgtacggtaacaaacctgtggcagtta                                                                                             | A1B2 (attP fwd)                                             |
| IDS2_DF_A1_c_attP_rev                                                                        | gacacaaaaactgccacagg   | taccgtacaccactgagaccgcggtgtgaccagacaaacctgtggcagtttta                                                                                               | A1B3 (attP rev); A1B4 (attP rev)                            |
| IDS2_DF_A1_c_attP_fwd                                                                        | gacacaaaaactgccacagg   | gctctgtcaaccaccgcggtctcagtggtgtacggtaacaaacctgtggcagtttta                                                                                           | A1B3 (attP fwd); A1B4 (attP fwd)                            |
| IDS2_DF_A4_b_attP_rev                                                                        | gcactcatttctccaagctc   | taccgtacaccactgagaccgcggtgtgaccagacaaacctctggaggaaa                                                                                                 | A4B7 (attP rev)                                             |
| IDS2_DF_A4_b_attP_fwd                                                                        | gcactcatttctccaagctc   | gctctgtcaaccaccgcggtctcagtggtgtacggtaacaaacctctggaggaaa                                                                                             | A4B7 (attP fwd)                                             |
| IDS2_DF_B2_a_attP_rev                                                                        | gtaggtacaggacagggcag   | gctctgtcaaccaccgcggtctcagtggtgtacggtaacaaacctccctgtcc                                                                                               | A1B2 (attP rev)                                             |
| IDS2_DF_B2_a_attP_fwd                                                                        | gtaggtacaggacagggcag   | taccgtacaccactgagaccgcggtgtgaccagacaaacctccctgtcc                                                                                                   | A1B2 (attP fwd)                                             |
| IDS2_DF_B3_a_attP_rev                                                                        | gagataggtaggtacaggaca  | tctgtcaaccaccgcggtctcagtggtgtacggtaacaaacctctgtacct                                                                                                 | A1B3 (attP rev)                                             |
| IDS2_DF_B3_a_attP_fwd                                                                        | gagataggtaggtacaggaca  | taccgtacaccactgagaccgcggtgtgaccagacaaacctctgtacct                                                                                                   | A1B3 (attP fwd)                                             |
| IDS2_DF_B4_b_attP_rev                                                                        | gtgaaaagataggtaggtac   | gctctgtcaaccaccgcggtctcagtggtgtacggtaacaaacctctacctatcta                                                                                            | A1B4 (attP rev)                                             |
| IDS2_DF_B4_b_attP_fwd                                                                        | gtgaaaagataggtaggtac   | taccgtacaccactgagaccgcggtgtgaccagacaaacctctacctatcta                                                                                                | A1B4 (attP fwd)                                             |
| IDS2_DF_B7_b_attP_rev                                                                        | gttatggtttactccatcta   | gctctgtcaaccaccgcggtctcagtggtgtacggtaacaaacctatggagtaaacct                                                                                          | A4B7 (attP rev)                                             |
| IDS2_DF_B7_b_attP_fwd                                                                        | gttatggtttactccatcta   | taccgtacaccactgagaccgcggtgtgaccagacaaacctatggagtaaacct                                                                                              | A4B7 (attP fwd)                                             |
| IDS_DF_C2_c_attB_rev                                                                         | gttttggttaccctatcta    | atgatctcgacgacggagaccgcccgtcgtcgacaagccatagggtaaacca                                                                                                | C2D2 (attB rev); C2D2 (attB fwd); C2D2 (attB fwd)           |
| IDS_DF_C2_c_attB_fwd                                                                         | gttttggttaccctatcta    | ggcttgtcgacgacggcggtctccgtcgtcaggatcatatagggtaaacca                                                                                                 | C2D1 (attB rev)                                             |
| IDS_DF_D1_b_attB_rev                                                                         | gctgtggaactgcaacacact  | ggcttgtcgacgacggcggtctccgtcgtcaggatcatgtgttcagct                                                                                                    | C2D1 (attB rev)                                             |
| IDS_DF_D1_b_attB_fwd                                                                         | gctgtggaactgcaacacact  | atgatctcgacgacggagaccgcccgtcgtcgacaagccgtgttcagct                                                                                                   | C2D1 (attB fwd)                                             |
| IDS_DF_D2_c_attB_rev                                                                         | gtgccacctaacagtggagctg | ggcttgtcgacgacggcggtctccgtcgtcaggatcatctcactgttaggt                                                                                                 | C2D2 (attB rev)                                             |
| IDS_DF_D2_c_attB_fwd                                                                         | gtgccacctaacagtggagctg | atgatctcgacgacggagaccgcccgtcgtcgacaagccctcactgttaggt                                                                                                | C2D2 (attB fwd)                                             |
| <b>Figure 4c</b>                                                                             |                        |                                                                                                                                                     |                                                             |
| <b>pegRNA</b>                                                                                | <b>spacer sequence</b> | <b>3' extension</b>                                                                                                                                 | <b>Edits made by the specified pegRNA</b>                   |
| IDS2_DF_A4_b_a_attP_rev                                                                      | gcactcatttctccaagctc   | taccgtacaccactgagaccgcggtgtgaccagacaaacctctggaggaaa                                                                                                 | pegRNA set1 installing attP_rev in IDS2 and attB_fwd in IDS |
| IDS2_DF_B7_b_attP_rev                                                                        | gttatggtttactccatcta   | gctctgtcaaccaccgcggtctcagtggtgtacggtaacaaacctatggagtaaacct                                                                                          | pegRNA set1 installing attP_rev in IDS2 and attB_fwd in IDS |
| IDS_DF_C2_c_attB_rev                                                                         | gttttggttaccctatcta    | ggcttgtcgacgacggcggtctccgtcgtcaggatcatatagggtaaacca                                                                                                 | pegRNA set1 installing attP_rev in IDS2 and attB_fwd in IDS |
| IDS_DF_D1_b_attB_rev                                                                         | gctgtggaactgcaacacact  | atgatctcgacgacggagaccgcccgtcgtcgacaagccgtgttcagct                                                                                                   | pegRNA set1 installing attP_rev in IDS2 and attB_fwd in IDS |
| IDS2_DF_A4_b_attP_fwd                                                                        | gcactcatttctccaagctc   | gctctgtcaaccaccgcggtctcagtggtgtacggtaacaaacctctggaggaaa                                                                                             | pegRNA set2 installing attP_fwd in IDS2 and attB_rev in IDS |
| IDS2_DF_B7_b_attP_fwd                                                                        | gttatggtttactccatcta   | taccgtacaccactgagaccgcggtgtgaccagacaaacctatggagtaaacct                                                                                              | pegRNA set2 installing attP_fwd in IDS2 and attB_rev in IDS |
| IDS_DF_C2_c_attB_rev                                                                         | gttttggttaccctatcta    | atgatctcgacgacggagaccgcccgtcgtcgacaagccatagggtaaacca                                                                                                | pegRNA set2 installing attP_rev in IDS2 and attB_rev in IDS |
| IDS_DF_D1_b_attB_rev                                                                         | gctgtggaactgcaacacact  | ggcttgtcgacgacggcggtctccgtcgtcaggatcatgtgttcagct                                                                                                    | pegRNA set2 installing attP_rev in IDS2 and attB_rev in IDS |
| <b>Extended Data Figures</b>                                                                 |                        |                                                                                                                                                     |                                                             |
| <b>ED Figure 1a - Comparison of twinPE- and PE3-mediated FKBP insertion at CCR5 region 1</b> |                        |                                                                                                                                                     |                                                             |
| <b>pegRNA</b>                                                                                | <b>spacer sequence</b> | <b>3' extension</b>                                                                                                                                 | <b>Edits made by the specified pegRNA</b>                   |
| PE3_CCR5_1_F414a_34_FKBP108                                                                  | ggtacctatcgattgtcagg   | tactgtccctcttgggctcactatctgtccgccaaatttcttccatcttcaagcatcccggtgtagtgcaccacgcaggtctgccgccttgggaaaggtgcgccctctcctctgggagatggtttccacctgcactccgacaatcga | indicated on the x-axis                                     |
| PE3_CCR5_1_F414a_29_FKBP108                                                                  | ggtacctatcgattgtcagg   | tccccttctgggctcactatctgtccgccaaatttcttccatcttcaagcatcccggtgtgtgcaaccacgcaggtctggccgccttgggaaaggtgcgccctctcctggggagatggtttccacctgcactccgacaatcga     | indicated on the x-axis                                     |
| PE3_CCR5_1_F414a_23_FKBP108                                                                  | ggtacctatcgattgtcagg   | tctggctcactatctgtccgccaaatttcttccatcttcaagcatcccggtgtgtgcaaccacgcaggtctggccgccttgggaaaggtgcgccctctcctgggagatggtttccacctgcactccgacaatcga             | indicated on the x-axis                                     |

|                             |                        |                                                                              |                         |
|-----------------------------|------------------------|------------------------------------------------------------------------------|-------------------------|
| twinPE_CCR5_1_F414a_FKBP108 | ggtacatcatcattgctcagg  | accttcccaagcgcggccagacctgcgtgctcactacaccgggatgcttgaagatggaagaatttgacaatcga   | indicated on the x-axis |
| twinPE_CCR5_1_E325b_FKBP108 | gctcatatgctgccgccccag  | accacgcaggctgcccgcctgggggaaggctgcgccctctcctgggagatggttccacctgactccggcgcagcat | indicated on the x-axis |
| <b>sgRNA</b>                | <b>spacer sequence</b> |                                                                              |                         |
| PE3_CCR5_A1_sgRNA           | gcatcctgataaactcaaaa   |                                                                              |                         |
| PE3_CCR5_A2_sgRNA           | ggacatctacctcctaacc    |                                                                              |                         |
| PE3_CCR5_A4_sgRNA           | gcaatgttcaactcttgac    |                                                                              |                         |

**ED Figure 1b - Comparison of twinPE- and PE3-mediated FKBP insertion at CCR5 region 2**

| pegRNA                      | spacer sequence        | 3' extension                                                                                                                                 | Edits made by the specified pegRNA |
|-----------------------------|------------------------|----------------------------------------------------------------------------------------------------------------------------------------------|------------------------------------|
| PE3_CCR5_2_F2_34_FKBP108    | gtgaaagacagcctggagtc   | agattggagaacccttgaaaagacatcaagcacaatttcttccatcttcaagcatcccggtgtagtgaccacgcaggctctgccgccttggggaaggctgcgccctctcctgggagatggtttccacctgactccaggct | indicated on the x-axis            |
| PE3_CCR5_2_F2_28_FKBP108    | gtgaaagacagcctggagtc   | gagaacccttgaaaagacatcaagcacaatttcttccatcttcaagcatcccgggtgtagtgaccacgcaggctctgccgccttggggaaggctgcgccctctcctgggagatggtttccacctgactccaggct      | indicated on the x-axis            |
| PE3_CCR5_2_F2_23_FKBP108    | gtgaaagacagcctggagtc   | acccttgaaaagacatcaagcacaatttcttccatcttcaagcatcccgggtgtagtgaccacgcaggctctgccgccttggggaaggctgcgccctctcctgggagatggtttccacctgactccaggct          | indicated on the x-axis            |
| twinPE_CCR5_2_F2a_FKBP108   | gtgaaagacagcctggagtc   | accttcccaagcgcggccagacctgcgtgctcactacaccgggatgcttgaagatggaagaattttccaggct                                                                    | indicated on the x-axis            |
| twinPE_CCR5_2_E2c_FKBP108nt | gaaaagacatcaagcacaga   | accacgcaggctgcccgccttggggaaggctgcgccctctcctgggagatggttccacctgactccgtgcttgaatgctt                                                             | indicated on the x-axis            |
| <b>sgRNA</b>                | <b>spacer sequence</b> |                                                                                                                                              |                                    |
| PE3_CCR5_C1_sgRNA           | gatgcagagtcagcagaact   |                                                                                                                                              |                                    |
| PE3_CCR5_C1.5_sgRNA         | ggaagtgagggtcagagagg   |                                                                                                                                              |                                    |
| PE3_CCR5_C4_sgRNA           | gatggattggtgtaaaagga   |                                                                                                                                              |                                    |

**ED Figure 1c - Long twinPE insertions at CCR5**

| pegRNA                | spacer sequence     | 3' extension                                                                      | Edits made by the specified pegRNA |
|-----------------------|---------------------|-----------------------------------------------------------------------------------|------------------------------------|
| CCR5_A7_attP_spacer27 | gctgtgtttgctctctccc | ttcgttatacggccttctcgcgaaaggtttgaccgtacaccactgagaccggggtgtgaccagacaaccagagacgcaaaa | attB-spacer-attP                   |
| CCR5_B8_spacer_attB   | gtatggaatgagagctgc  | ttcgcgaagaaatggcgtataacgaaggctgtgacgacggcgctctccgtctcagatcatgctctatttfc           | attB-spacer-attB                   |
| CCR5_A7_attB_spacer27 | gctgtgtttgctctctccc | ttcgttatacggccttctcgcgaaatgatcctgacgacggagaccggcctgctgcaaaagccagagacgcaaaa        | attB-spacer-attB                   |

**ED Figure 2 - PAH exon recoding via twinPE**

| pegRNA    | spacer sequence       | 3' extension                                                              | Edits made by the specified pegRNA |
|-----------|-----------------------|---------------------------------------------------------------------------|------------------------------------|
| PAH_2.1.1 | gctcaataaagcgaataactt | tgatcttcagcctgaaggaaaggtggcgccctggcgaaggattgctgctt                        | indicated on the x-axis            |
| PAH_2.1.2 | gctcaataaagcgaataactt | tgatcttcagcctgaaggaaaggtggcgccctggcgaaggattgctgcttatt                     | indicated on the x-axis            |
| PAH_2.1.3 | gctcaataaagcgaataactt | tgatcttcagcctgaaggaaaggtggcgccctggcgaaggattgctgcttattgt                   | indicated on the x-axis            |
| PAH_2.2.1 | gaagacaactgcaatcaaaa  | tcttcctcagcctgaagatcagagatagcgccttctgattgagcag                            | indicated on the x-axis            |
| PAH_2.2.2 | gaagacaactgcaatcaaaa  | tcttcctcagcctgaagatcagagatagcgccttctgattgagcagttg                         | indicated on the x-axis            |
| PAH_2.2.3 | gaagacaactgcaatcaaaa  | tcttcctcagcctgaagatcagagatagcgccttctgattgagcagttgctc                      | indicated on the x-axis            |
| PAH_4.1.1 | gttctctgtttcagtgccc   | aagattgattagcgaacctatcaagttcctgaattgctcgtggaaccacggcactgaaac              | indicated on the x-axis            |
| PAH_4.1.2 | gttctctgtttcagtgccc   | aagattgattagcgaacctatcaagttcctgaattgctcgtggaaccacggcactgaaacac            | indicated on the x-axis            |
| PAH_4.1.3 | gttctctgtttcagtgccc   | aagattgattagcgaacctatcaagttcctgaattgctcgtggaaccacggcactgaaacacag          | indicated on the x-axis            |
| PAH_4.1.4 | gttctctgtttcagtgccc   | gacaagattgattagcgaacctatcaagttcctgaattgctcgtggaaccacggcactgaaac           | indicated on the x-axis            |
| PAH_4.1.5 | gttctctgtttcagtgccc   | gacaagattgattagcgaacctatcaagttcctgaattgctcgtggaaccacggcactgaaacac         | indicated on the x-axis            |
| PAH_4.1.6 | gttctctgtttcagtgccc   | gacaagattgattagcgaacctatcaagttcctgaattgctcgtggaaccacggcactgaaacacag       | indicated on the x-axis            |
| PAH_4.2.1 | gccaagaaccattcaagagc  | ggctccgtagacacaagattgattagcgaacctatcaagttctgaatgg                         | indicated on the x-axis            |
| PAH_4.2.2 | gccaagaaccattcaagagc  | ggctccgtagacacaagattgattagcgaacctatcaagttctgaatggctc                      | indicated on the x-axis            |
| PAH_4.2.3 | gccaagaaccattcaagagc  | ggctccgtagacacaagattgattagcgaacctatcaagttctgaatggctctg                    | indicated on the x-axis            |
| PAH_4.2.4 | gccaagaaccattcaagagc  | gttcggctccgtagacacaagattgattagcgaacctatcaagttctgaatgg                     | indicated on the x-axis            |
| PAH_4.2.5 | gccaagaaccattcaagagc  | gttcggctccgtagacacaagattgattagcgaacctatcaagttctgaatggctc                  | indicated on the x-axis            |
| PAH_4.2.6 | gccaagaaccattcaagagc  | gttcggctccgtagacacaagattgattagcgaacctatcaagttctgaatggctctg                | indicated on the x-axis            |
| PAH_4.2.7 | gccaagaaccattcaagagc  | gatgatcagcgtcaagttcggctccgtagacacaagattgattagcgaacctatcaagttctgaatgg      | indicated on the x-axis            |
| PAH_4.2.8 | gccaagaaccattcaagagc  | gatgatcagcgtcaagttcggctccgtagacacaagattgattagcgaacctatcaagttctgaatggctc   | indicated on the x-axis            |
| PAH_4.2.9 | gccaagaaccattcaagagc  | gatgatcagcgtcaagttcggctccgtagacacaagattgattagcgaacctatcaagttctgaatggctctg | indicated on the x-axis            |
| PAH_4.3.1 | gcgggcatggactcacaggg  | ataggttcgtaataaattcttctctacggaccgaacttgacgctgatcatcctgtgagtcc             | indicated on the x-axis            |
| PAH_4.3.2 | gcgggcatggactcacaggg  | ataggttcgtaataaattcttctctacggaccgaacttgacgctgatcatcctgtgagtccat           | indicated on the x-axis            |





|                     |                       |                                                               |                         |
|---------------------|-----------------------|---------------------------------------------------------------|-------------------------|
| PAH_7.6.6           | gtctgatgtactgtgtgcag  | agttagactttctgggggtctcgcattccgctgtttcattgcacacagatc           | indicated on the x-axis |
| PAH_7.6.7           | gtctgatgtactgtgtgcag  | tgggggtctcgcattccgctgtttcattgcacacagta                        | indicated on the x-axis |
| PAH_7.6.8           | gtctgatgtactgtgtgcag  | tgggggtctcgcattccgctgtttcattgcacacagata                       | indicated on the x-axis |
| PAH_7.6.9           | gtctgatgtactgtgtgcag  | tgggggtctcgcattccgctgtttcattgcacacagatc                       | indicated on the x-axis |
| PAH_7.7.1           | gttcgggggtatacatgggct | gggtctcgcattccgctgtttcattgtaccagatattaggcatgttcaaaacccatg     | indicated on the x-axis |
| PAH_7.7.2           | gttcgggggtatacatgggct | tatac                                                         |                         |
| PAH_7.7.3           | gttcgggggtatacatgggct | gggtctcgcattccgctgtttcattgtaccagatattaggcatgttcaaaacccatg     | indicated on the x-axis |
| PAH_7.7.4           | gttcgggggtatacatgggct | tataccc                                                       |                         |
| PAH_7.7.5           | gttcgggggtatacatgggct | gggtctcgcattccgctgtttcattgtaccagatattaggcatgttcaaaacccatg     | indicated on the x-axis |
| PAH_7.7.6           | gttcgggggtatacatgggct | tataccc                                                       |                         |
| PAH_7.7.7           | gttcgggggtatacatgggct | attccgctgtttcattgtaccagatattaggcatgttcaaaacccatgtatac         | indicated on the x-axis |
| PAH_7.7.8           | gttcgggggtatacatgggct | attccgctgtttcattgtaccagatattaggcatgttcaaaacccatgtataccc       | indicated on the x-axis |
| PAH_7.7.9           | gttcgggggtatacatgggct | attccgctgtttcattgtaccagatattaggcatgttcaaaacccatgtataccc       | indicated on the x-axis |
| PAH_7.8.1           | ggacagtactcacggttcgg  | cggtgtttcattgtaccagatattaggcatgttcaaaacccatgtacacaccagaac     | indicated on the x-axis |
| PAH_7.8.2           | ggacagtactcacggttcgg  | cggtgtttcattgtaccagatattaggcatgttcaaaacccatgtacacaccagaac     | indicated on the x-axis |
| PAH_7.8.3           | ggacagtactcacggttcgg  | cggtgtttcattgtaccagatattaggcatgttcaaaacccatgtacacaccagaac     | indicated on the x-axis |
| PAH_7.8.4           | ggacagtactcacggttcgg  | cggtgtttcattgtaccagatattaggcatgttcaaaacccatgtacacaccagaac     | indicated on the x-axis |
| PAH_7.8.5           | ggacagtactcacggttcgg  | cggtgtttcattgtaccagatattaggcatgttcaaaacccatgtacacaccagaac     | indicated on the x-axis |
| PAH_7.8.6           | ggacagtactcacggttcgg  | cggtgtttcattgtaccagatattaggcatgttcaaaacccatgtacacaccagaac     | indicated on the x-axis |
| PAH_8.1.1           | gtgacatctgccatgagctgt | attgtaccagatattaggcatgttcaaaacccatgtacacaccagaaccgtga         | indicated on the x-axis |
| PAH_8.1.2           | gtgacatctgccatgagctgt | attgtaccagatattaggcatgttcaaaacccatgtacacaccagaaccgtgagt       | indicated on the x-axis |
| PAH_8.1.3           | gtgacatctgccatgagctgt | attgtaccagatattaggcatgttcaaaacccatgtacacaccagaaccgtgagta      | indicated on the x-axis |
| PAH_8.2.1           | gtaaaaaatccattccttacc | c                                                             |                         |
| PAH_8.2.2           | gtaaaaaatccattccttacc | gaaggacatctcgtgaacagtggcacgtgaccgagaagctcatggc                | indicated on the x-axis |
| PAH_8.2.3           | gtaaaaaatccattccttacc | gaaggacatctcgtgaacagtggcacgtgaccgagaagctcatggcag              | indicated on the x-axis |
| PAH_9.1.1           | gtfcccccaattacaggaaat | gaaggacatctcgtgaacagtggcacgtgaccgagaagctcatggcagat            | indicated on the x-axis |
| PAH_9.1.2           | gtfcccccaattacaggaaat | actgttcagcagataggtccttcgcacagttctctcaggtaaaggaatgg            | indicated on the x-axis |
| PAH_9.1.3           | gtfcccccaattacaggaaat | actgttcagcagataggtccttcgcacagttctctcaggtaaaggaatgg            | indicated on the x-axis |
| PAH_9.1.4           | gtfcccccaattacaggaaat | actgttcagcagataggtccttcgcacagttctctcaggtaaaggaatgg            | indicated on the x-axis |
| PAH_9.1.5           | gtfcccccaattacaggaaat | actgttcagcagataggtccttcgcacagttctctcaggtaaaggaatgg            | indicated on the x-axis |
| PAH_9.1.6           | gtfcccccaattacaggaaat | actgttcagcagataggtccttcgcacagttctctcaggtaaaggaatgg            | indicated on the x-axis |
| PAH_9.2.1           | gggagagaaggacttactg   | tataatactcgtctgtctcccaggctgccagaccgatctcctgtaatt              | indicated on the x-axis |
| PAH_9.2.2           | gggagagaaggacttactg   | tataatactcgtctgtctcccaggctgccagaccgatctcctgtaattgg            | indicated on the x-axis |
| PAH_9.2.3           | gggagagaaggacttactg   | tataatactcgtctgtctcccaggctgccagaccgatctcctgtaattggg           | indicated on the x-axis |
| PAH_9.3.1           | gaccatccaccaggagaga   | ttctctataatactcgtctgtctcccaggctgccagaccgatctcctgtaatt         | indicated on the x-axis |
| PAH_9.3.2           | gaccatccaccaggagaga   | ttctctataatactcgtctgtctcccaggctgccagaccgatctcctgtaattgg       | indicated on the x-axis |
| PAH_9.3.3           | gaccatccaccaggagaga   | ttctctataatactcgtctgtctcccaggctgccagaccgatctcctgtaattggg      | indicated on the x-axis |
| PAH_10.2.1_EvoPreQ1 | gccaatttactggtttactg  | ttctctataatactcgtctgtctcccaggctgccagaccgatctcctgtaattggg      | indicated on the x-axis |
| PAH_10.2.2_EvoPreQ1 | gccaatttactggtttactg  | tgggagcaccagacgagatataagaaactgctacagtaagtcctt                 | indicated on the x-axis |
| PAH_10.2.3_EvoPreQ1 | gccaatttactggtttactg  | tgggagcaccagacgagatataagaaactgctacagtaagtcctt                 | indicated on the x-axis |
| PAH_10.3.1_EvoPreQ1 | gtaattcaccaaaggatgac  | tgggagcaccagacgagatataagaaactgctacagtaagtccttctc              | indicated on the x-axis |
| PAH_10.3.2_EvoPreQ1 | gtaattcaccaaaggatgac  | accagacgagatataagaaactgctacagtaagtccttctcctcctgggt            | indicated on the x-axis |
| PAH_10.3.3_EvoPreQ1 | gtaattcaccaaaggatgac  | accagacgagatataagaaactgctacagtaagtccttctcctcctgggtgga         | indicated on the x-axis |
| PAH_11.1.1_EvoPreQ1 | gaagccaaagcttctcccc   | gtagcctttaaigtctatcaccctgcttacacaatccgaattcgacggtaaaccagtaaat | indicated on the x-axis |
| PAH_11.1.2_EvoPreQ1 | gaagccaaagcttctcccc   | ctctctctgacgcggttctatctagtacgcggtaaaccaactagaaa               | indicated on the x-axis |
| PAH_11.1.3_EvoPreQ1 | gaagccaaagcttctcccc   | gtagcctttaaigtctatcaccctgcttacacaatccgaattcgacggtaaaccagtaaat | indicated on the x-axis |
| PAH_11.2.1_EvoPreQ1 | gaaagcttctccccctggagc | ctctctctctgacgcggttctatctagtacgcggtaaaccaactagaaa             | indicated on the x-axis |
| PAH_11.2.2_EvoPreQ1 | gaaagcttctccccctggagc | taagcagggatagatcattaaagcctacggagcaggtttgctctcatcttgggtctct    | indicated on the x-axis |
| PAH_11.2.3_EvoPreQ1 | gaaagcttctccccctggagc | taagcagggatagatcattaaagcctacggagcaggtttgctctcatcttgggtgatc    | indicated on the x-axis |
| PAH_11.4.1_EvoPreQ1 | gaactctctgccagtaatag  | ctctctgacgcggttctatctagtacgcggtaaaccaactagaaa                 | indicated on the x-axis |
| PAH_11.4.2_EvoPreQ1 | gaactctctgccagtaatag  | taagcagggatagatcattaaagcctacggagcaggtttgctctcatcttgggtaatc    | indicated on the x-axis |
| PAH_11.4.3_EvoPreQ1 | gaactctctgccagtaatag  | ctctctgacgcggttctatctagtacgcggtaaaccaactagaaa                 | indicated on the x-axis |
| PAH_12.2.1_EvoPreQ1 | gactttgctccacaataacct | taagcagggatagatcattaaagcctacggagcaggtttgctctcatcttgggtaatc    | indicated on the x-axis |
| PAH_12.2.2_EvoPreQ1 | gactttgctccacaataacct | ctctctgacgcggttctatctagtacgcggtaaaccaactagaaa                 | indicated on the x-axis |

|                     |                       |                                                              |                         |
|---------------------|-----------------------|--------------------------------------------------------------|-------------------------|
| PAH_12.2.3_EvoPreQ1 | gacttctgccacaatacct   | ttcgatgcgctgtgataagatcatatctcagcctaaatggctgtgattgtgagcagct   | indicated on the x-axis |
| PAH_12.3.1_EvoPreQ1 | gtctacgaccatacacccaa  | ctctctcttgacgcggcttctatctgtagcgcgftaaaccaactagaaa            | indicated on the x-axis |
| PAH_12.3.2_EvoPreQ1 | gtctacgaccatacacccaa  | gatctcaattgttgagtggtatctgagcactctgagcgcgggtgtagtctctctcttg   | indicated on the x-axis |
| PAH_12.3.3_EvoPreQ1 | gtctacgaccatacacccaa  | acgcgggtctatctgtagcgcgftaaaccaactagaaa                       | indicated on the x-axis |
| PAH_12.4.1_EvoPreQ1 | gcagccaaaatcttaagctgc | gatctcaattgttgagtggtatctgagcactctgagcgcgggtgtagtctctctctt    | indicated on the x-axis |
| PAH_12.4.2_EvoPreQ1 | gcagccaaaatcttaagctgc | gacgcgggtctatctgtagcgcgftaaaccaactagaaa                      | indicated on the x-axis |
| PAH_12.4.3_EvoPreQ1 | gcagccaaaatcttaagctgc | gatctcaattgttgagtggtatctgagcactctgagcgcgggtgtagtctctctctctc  | indicated on the x-axis |
| PAH_12.5.1_EvoPreQ1 | gtgtaaattacttactgttaa | ttgatctctatacacagcgcgacgaaagtgtctgataacactcaacagcttaagattctc | indicated on the x-axis |
| PAH_12.5.2_EvoPreQ1 | gtgtaaattacttactgttaa | tctcttgacgcgggtctatctgtagcgcgftaaaccaactagaaa                | indicated on the x-axis |
| PAH_12.5.3_EvoPreQ1 | gtgtaaattacttactgttaa | ttgatctctatacacagcgcgacgaaagtgtctgataacactcaacagcttaagatttag | indicated on the x-axis |

**ED Figure 3- pegRNA screen in CCR5**

| 3' extension | 3' extension           | 3' extension                                    | 3' extension            |
|--------------|------------------------|-------------------------------------------------|-------------------------|
| CCR5_A223a   | gtcatctgtataaactgcaaaa | atgatctctgacgacggagaccgctgctgacaaagccgcagtttacc | indicated on the x-axis |
| CCR5_A223b   | gtcatctgtataaactgcaaaa | atgatctctgacgacggagaccgctgctgacaaagccgcagtttacc | indicated on the x-axis |
| CCR5_A223c   | gtcatctgtataaactgcaaaa | atgatctctgacgacggagaccgctgctgacaaagccgcagtttacc | indicated on the x-axis |
| CCR5_A260a   | gtgacatctactgctcaacc   | atgatctctgacgacggagaccgctgctgacaaagccgcagtttacc | indicated on the x-axis |
| CCR5_A260b   | gtgacatctactgctcaacc   | atgatctctgacgacggagaccgctgctgacaaagccgcagtttacc | indicated on the x-axis |
| CCR5_A260c   | gtgacatctactgctcaacc   | atgatctctgacgacggagaccgctgctgacaaagccgcagtttacc | indicated on the x-axis |
| CCR5_A325a   | gtcactatgctgcccag      | atgatctctgacgacggagaccgctgctgacaaagccgcagtttacc | indicated on the x-axis |
| CCR5_A325b   | gtcactatgctgcccag      | atgatctctgacgacggagaccgctgctgacaaagccgcagtttacc | indicated on the x-axis |
| CCR5_A325c   | gtcactatgctgcccag      | atgatctctgacgacggagaccgctgctgacaaagccgcagtttacc | indicated on the x-axis |
| CCR5_A360a   | gacaatgtgtcaactcttgac  | atgatctctgacgacggagaccgctgctgacaaagccgcagtttacc | indicated on the x-axis |
| CCR5_A360b   | gacaatgtgtcaactcttgac  | atgatctctgacgacggagaccgctgctgacaaagccgcagtttacc | indicated on the x-axis |
| CCR5_A360c   | gacaatgtgtcaactcttgac  | atgatctctgacgacggagaccgctgctgacaaagccgcagtttacc | indicated on the x-axis |
| CCR5_A506a   | gacaagtgtgacacttggg    | atgatctctgacgacggagaccgctgctgacaaagccgcagtttacc | indicated on the x-axis |
| CCR5_A506b   | gacaagtgtgacacttggg    | atgatctctgacgacggagaccgctgctgacaaagccgcagtttacc | indicated on the x-axis |
| CCR5_A506c   | gacaagtgtgacacttggg    | atgatctctgacgacggagaccgctgctgacaaagccgcagtttacc | indicated on the x-axis |
| CCR5_A509a   | gaagtgtgacacttgggtgg   | atgatctctgacgacggagaccgctgctgacaaagccgcagtttacc | indicated on the x-axis |
| CCR5_A509b   | gaagtgtgacacttgggtgg   | atgatctctgacgacggagaccgctgctgacaaagccgcagtttacc | indicated on the x-axis |
| CCR5_A509c   | gaagtgtgacacttgggtgg   | atgatctctgacgacggagaccgctgctgacaaagccgcagtttacc | indicated on the x-axis |
| CCR5_A531a   | gtgtgtttgctctctccc     | atgatctctgacgacggagaccgctgctgacaaagccgcagtttacc | indicated on the x-axis |
| CCR5_A531b   | gtgtgtttgctctctccc     | atgatctctgacgacggagaccgctgctgacaaagccgcagtttacc | indicated on the x-axis |
| CCR5_A531c   | gtgtgtttgctctctccc     | atgatctctgacgacggagaccgctgctgacaaagccgcagtttacc | indicated on the x-axis |
| CCR5_B272a   | gaaggaaaaaacaggtcagaga | ggcttctgacgacggcggtctccgtctcagcagatcatctgacctgt | indicated on the x-axis |
| CCR5_B272b   | gaaggaaaaaacaggtcagaga | ggcttctgacgacggcggtctccgtctcagcagatcatctgacctgt | indicated on the x-axis |
| CCR5_B272c   | gaaggaaaaaacaggtcagaga | ggcttctgacgacggcggtctccgtctcagcagatcatctgacctgt | indicated on the x-axis |
| CCR5_B291a   | gcccagaaggggacagtaaga  | ggcttctgacgacggcggtctccgtctcagcagatcatctgacctgt | indicated on the x-axis |
| CCR5_B291b   | gcccagaaggggacagtaaga  | ggcttctgacgacggcggtctccgtctcagcagatcatctgacctgt | indicated on the x-axis |
| CCR5_B291c   | gcccagaaggggacagtaaga  | ggcttctgacgacggcggtctccgtctcagcagatcatctgacctgt | indicated on the x-axis |
| CCR5_B305a   | ggcagcatagtgagcccaga   | ggcttctgacgacggcggtctccgtctcagcagatcatctgacctgt | indicated on the x-axis |
| CCR5_B305b   | ggcagcatagtgagcccaga   | ggcttctgacgacggcggtctccgtctcagcagatcatctgacctgt | indicated on the x-axis |
| CCR5_B305c   | ggcagcatagtgagcccaga   | ggcttctgacgacggcggtctccgtctcagcagatcatctgacctgt | indicated on the x-axis |
| CCR5_B326a   | gatttccaaagtcccactggg  | ggcttctgacgacggcggtctccgtctcagcagatcatctgacctgt | indicated on the x-axis |
| CCR5_B326b   | gatttccaaagtcccactggg  | ggcttctgacgacggcggtctccgtctcagcagatcatctgacctgt | indicated on the x-axis |
| CCR5_B326c   | gatttccaaagtcccactggg  | ggcttctgacgacggcggtctccgtctcagcagatcatctgacctgt | indicated on the x-axis |
| CCR5_B330a   | gatttccaaagtcccactggg  | ggcttctgacgacggcggtctccgtctcagcagatcatctgacctgt | indicated on the x-axis |
| CCR5_B330b   | gatttccaaagtcccactggg  | ggcttctgacgacggcggtctccgtctcagcagatcatctgacctgt | indicated on the x-axis |
| CCR5_B330c   | gatttccaaagtcccactggg  | ggcttctgacgacggcggtctccgtctcagcagatcatctgacctgt | indicated on the x-axis |
| CCR5_B414a   | ggtacctatcgtgatttcagg  | ggcttctgacgacggcggtctccgtctcagcagatcatctgacctgt | indicated on the x-axis |
| CCR5_B414b   | ggtacctatcgtgatttcagg  | ggcttctgacgacggcggtctccgtctcagcagatcatctgacctgt | indicated on the x-axis |
| CCR5_B414c   | ggtacctatcgtgatttcagg  | ggcttctgacgacggcggtctccgtctcagcagatcatctgacctgt | indicated on the x-axis |
| CCR5_B535a   | gatctggtgtaagatgattcc  | ggcttctgacgacggcggtctccgtctcagcagatcatctgacctgt | indicated on the x-axis |
| CCR5_B535b   | gatctggtgtaagatgattcc  | ggcttctgacgacggcggtctccgtctcagcagatcatctgacctgt | indicated on the x-axis |
| CCR5_B535c   | gatctggtgtaagatgattcc  | ggcttctgacgacggcggtctccgtctcagcagatcatctgacctgt | indicated on the x-axis |
| CCR5_B584a   | gtatfgaaaaatgagagctgc  | ggcttctgacgacggcggtctccgtctcagcagatcatctgacctgt | indicated on the x-axis |
| CCR5_B584b   | gtatfgaaaaatgagagctgc  | ggcttctgacgacggcggtctccgtctcagcagatcatctgacctgt | indicated on the x-axis |
| CCR5_B584c   | gtatfgaaaaatgagagctgc  | ggcttctgacgacggcggtctccgtctcagcagatcatctgacctgt | indicated on the x-axis |
| CCR5_B601a   | gcagaattgatactgactgta  | ggcttctgacgacggcggtctccgtctcagcagatcatctgacctgt | indicated on the x-axis |
| CCR5_B601b   | gcagaattgatactgactgta  | ggcttctgacgacggcggtctccgtctcagcagatcatctgacctgt | indicated on the x-axis |
| CCR5_B601c   | gcagaattgatactgactgta  | ggcttctgacgacggcggtctccgtctcagcagatcatctgacctgt | indicated on the x-axis |

**ED Figure 4 - pegRNA screen at AAVS1**

| pegRNA       | spacer sequence       | 3' extension                                        | Edits made by the specified pegRNA |
|--------------|-----------------------|-----------------------------------------------------|------------------------------------|
| AAVS1_A1077a | gcagagccaggaaacccctgt | taccgtacaccactgagaccgctggtgaccagacaaaacctggggtctct  | indicated on the x-axis            |
| AAVS1_A1077b | gcagagccaggaaacccctgt | taccgtacaccactgagaccgctggtgaccagacaaaacctggggtctctg | indicated on the x-axis            |
| AAVS1_A1077c | gcagagccaggaaacccctgt | taccgtacaccactgagaccgctggtgaccagacaaaacctggggtctctg | indicated on the x-axis            |



**ED Figure 5a - Comparison of twinPE- and PE3-mediated attB insertion at CCR5 region 1**

| pegRNA            | spacer sequence        | 3' extension                                                               | Edits made by the specified pegRNA |
|-------------------|------------------------|----------------------------------------------------------------------------|------------------------------------|
| CCR5_A325b_attB   | gtcactatgctgccgccag    | atgatcctgacgacggagaccgctcgtcgacaagccggcgagcagcat                           | indicated on the x-axis            |
| CCR5_B414a_attB   | ggtacatctgattgtcagg    | ggctgtgacgacggcggtcctcgtcagatcatgacaatcga                                  | indicated on the x-axis            |
| CCR5_B414_23      | ggtacatctgattgtcagg    | tctggctcactatgctgccggcttctcgtcagacggcggtcctcgtcagatcatgacaatcga            | indicated on the x-axis            |
| CCR5_B414_29      | ggtacatctgattgtcagg    | tccccttgggctcactatgctgccggcttctcgtcagacggcggtcctcgtcagatcatgacaatcga       | indicated on the x-axis            |
| CCR5_B414_34      | ggtacatctgattgtcagg    | tactgtccccttctggctcactatgctgccggcttctcgtcagacggcggtcctcgtcagatcatgacaatcga | indicated on the x-axis            |
| <b>sgRNA</b>      | <b>spacer sequence</b> |                                                                            |                                    |
| PE3_CCR5_A1_sgRNA | gcatcctgataaactgcaaa   |                                                                            |                                    |
| PE3_CCR5_A2_sgRNA | ggacatctacctgctcaacc   |                                                                            |                                    |
| PE3_CCR5_A4_sgRNA | gcaatgtgtcaactcttgac   |                                                                            |                                    |

**ED Figure 5b - Comparison of twinPE- and PE3-mediated attB insertion at CCR5 region 2**

| pegRNA              | spacer sequence        | 3' extension                                                              | Edits made by the specified pegRNA |
|---------------------|------------------------|---------------------------------------------------------------------------|------------------------------------|
| CCR5_C2c_attB       | gaaaagacatcaagcacaga   | atgatcctgacgacggagaccgctcgtcgacaagccgcttctgattctt                         | indicated on the x-axis            |
| CCR5_D2a_attB       | gtgaaagacagcctggagtc   | ggctgtgacgacggcggtcctcgtcagatcatcaggct                                    | indicated on the x-axis            |
| CCR5_D2_23          | gtgaaagacagcctggagtc   | acccttgaaaagacatcaagcacggcttctcgtcagacggcggtcctcgtcagatcatcaggct          | indicated on the x-axis            |
| CCR5_D2_28          | gtgaaagacagcctggagtc   | gagaaaccttgaaaagacatcaagcacggcttctcgtcagacggcggtcctcgtcagatcatcaggct      | indicated on the x-axis            |
| CCR5_D2_34          | gtgaaagacagcctggagtc   | agattggagaaccttgaaaagacatcaagcacggcttctcgtcagacggcggtcctcgtcagatcatcaggct | indicated on the x-axis            |
| <b>sgRNA</b>        | <b>spacer sequence</b> |                                                                           |                                    |
| PE3_CCR5_C1_sgRNA   | gatgacagctcagcagaact   |                                                                           |                                    |
| PE3_CCR5_C1.5_sgRNA | ggaagtgagggtcagagagg   |                                                                           |                                    |
| PE3_CCR5_C4_sgRNA   | gatggattggttaaaagga    |                                                                           |                                    |

**ED Figure 6b - HTS junction purity**

| pegRNA       | spacer sequence      | 3' extension                                          | Edits made by the specified pegRNA |
|--------------|----------------------|-------------------------------------------------------|------------------------------------|
| CCR5_A325a   | gtcactatgctgccgccag  | atgatcctgacgacggagaccgctcgtcgacaagccggcgagcagc        | 325/414                            |
| CCR5_B414b   | ggtacatctgattgtcagg  | ggctgtgacgacggcggtcctcgtcagatcatgacaatcga             | 325/414                            |
| CCR5_A506c   | gacaagtgtgatacctggg  | atgatcctgacgacggagaccgctcgtcgacaagccaaagtgtcacaact    | 506/584                            |
| CCR5_A509b   | gaaagtgtgatacctggg   | atgatcctgacgacggagaccgctcgtcgacaagcccaagtgtc          | 509/584                            |
| CCR5_A531b   | gctgtgtttgctctctccc  | atgatcctgacgacggagaccgctcgtcgacaagccagagacgcaaa       | 531/584                            |
| CCR5_B584b   | gtatggaaaatgagagctgc | ggctgtgacgacggcggtcctcgtcagatcatgctctcattttc          | 506/584, 509/584, 531/584          |
| AAVS1_A1077c | gcagagccaggaacctctgt | taccgtacaccactgagaccgctggtgtgaccagacaaacctggggtctggct | 1077/1154                          |
| AAVS1_B1154c | gtccttggcaagcccaggag | tctgtcaaccaccgctcgtcagtggtgtacggtacaacctctgggcttccaa  | 1077/1154                          |
| AAVS1_A3786c | gctggccccccaccgccc   | taccgtacaccactgagaccgctggtgtgaccagacaaacctggcgtgggggg | 3786/3903, 3786/3930               |
| AAVS1_B3903c | cgactcctggaaatggcca  | tctgtcaaccaccgctcgtcagtggtgtacggtacaacctcacttccaggag  | 3786/3903                          |
| AAVS1_B3930c | ggactcccagtgatcatgc  | tctgtcaaccaccgctcgtcagtggtgtacggtacaaccttgacactgggaa  | 3786/3930                          |

**ED Figure 6c - Multiplex single transfection knock-in**

| pegRNA             | spacer sequence      | 3' extension                                          | Edits made by the specified pegRNA |
|--------------------|----------------------|-------------------------------------------------------|------------------------------------|
| AAVS1_A1077c       | gcagagccaggaacctctgt | taccgtacaccactgagaccgctggtgtgaccagacaaacctggggtctggct | AAVS1 attP, all samples on x-axis  |
| AAVS1_B1154c       | gtccttggcaagcccaggag | tctgtcaaccaccgctcgtcagtggtgtacggtacaacctctgggcttccaa  | AAVS1 attP, all samples on x-axis  |
| CCR5_A7_attB_20    | gctgtgtttgctctctccc  | acgacggagaccgctcgtcgacaagccagagacgcaaa                | CCR5 attB                          |
| CCR5_B8_attB_20    | gtatggaaaatgagagctgc | acgacggcggtcctcgtcagatcatgctctcattttc                 | CCR5 attB                          |
| CCR5_A7_attB_GA_20 | gctgtgtttgctctctccc  | acgacggagtcgctcgtcgtcgacaagccagagacgcaaa              | CCR5 attB-GA                       |
| CCR5_B8_attB_GA_20 | gtatggaaaatgagagctgc | acgacggcgactcctcgtcgtcagatcatgctctcattttc             | CCR5 attB-GA                       |
| CCR5_A7_attP_30    | gctgtgtttgctctctccc  | cgtaaccactgagaccgctggtgtgaccagacaaaccaagagacgcaaa     | CCR5 attP                          |
| CCR5_B8_attP_30    | gtatggaaaatgagagctgc | ggtaaccaccgctcgtcagtggtgtacggtacaacctcacttccattttc    | CCR5 attP                          |
| CCR5_A7_attP_GA_30 | gctgtgtttgctctctccc  | cgtaaccactgagtcgctggtgtgaccagacaaaccaagagacgcaaa      | CCR5 attP-GA                       |
| CCR5_B8_attP_GA_30 | gtatggaaaatgagagctgc | ggtaaccaccgctgactcagtggtgtacggtacaacctcacttctcattttc  | CCR5 attP-GA                       |

**ED Figure 6d - Overlap reduction**

| pegRNA          | spacer sequence      | 3' extension                                    | Edits made by the specified pegRNA |
|-----------------|----------------------|-------------------------------------------------|------------------------------------|
| CCR5_A531b      | gctgtgtttgctctctccc  | atgatcctgacgacggagaccgctcgtcgacaagccagagacgcaaa | attB 38                            |
| CCR5_B584b      | gtatggaaaatgagagctgc | ggctgtgacgacggcggtcctcgtcagatcatgctctcattttc    | attB 38                            |
| CCR5_A7_attB_30 | gctgtgtttgctctctccc  | tctgacgacggagaccgctcgtcgacaagccagagacgcaaa      | attB 30                            |
| CCR5_B8_attB_30 | gtatggaaaatgagagctgc | gtgacgacggcggtcctcgtcagatcatgctctcattttc        | attB 30                            |
| CCR5_A7_attB_20 | gctgtgtttgctctctccc  | acgacggagaccgctcgtcgacaagccagagacgcaaa          | attB 20                            |
| CCR5_B8_attB_20 | gtatggaaaatgagagctgc | acgacggcggtcctcgtcagatcatgctctcattttc           | attB 20                            |

**ED figure 7 - Factor 9 knock-in**

| pegRNA          | spacer sequence        | 3' extension                                      | Edits made by the specified pegRNA |
|-----------------|------------------------|---------------------------------------------------|------------------------------------|
| CCR5_A7_attB_20 | gctgtgtttcgctctctccc   | acgacggagaccgcccgtctcgcacaagccagagacgcaaa         | CCR5 attB                          |
| CCR5_B8_attB_20 | gtatggaatgagagctgc     | acgacggcggtctccgtctcgcaggatcatgctctatttc          | CCR5 attB                          |
| CCR5_A277c      | gactgaaacttcacagaata   | gaaacttcacagagcctgtcgcagcagcggcgtctccgtcagatcat   | ALB attB                           |
| CCR5_B358c      | gatttatgagatcaacagcagc | ggctgtcgcagcagcggcgtctccgtcgcaggatcatctgtgatctcat | ALB attB                           |

**ED figure 8 - TwinPE+Bxb1 mediated inversion in the GFP reporter cells**

| pegRNA                | spacer sequence       | 3' extension                                           | Edits made by the specified pegRNA                                              |
|-----------------------|-----------------------|--------------------------------------------------------|---------------------------------------------------------------------------------|
| AAVS1_A1077b_attB_rev | gcagagccaggaaacccctgt | ggctgtcgcagcagcggcgtctccgtcgcaggatcatggggttctctgg      | twinPE-mediated insertion of attB_rev in AAVS1 upstream of H2B_EGFP sequences   |
| AAVS1_B1154b_attB_fwd | gtccttggcaagcccaggag  | atgatcctgacagcggagaccgctcgtcgcacaagccctggggttggc       | twinPE-mediated insertion of attB_rev in AAVS1 upstream of H2B_EGFP sequences   |
| AAVS1_A3835b          | gacgtcacggcgtgccccca  | taccgtacaccactgagaccgcggtgttgaccagacaaaacctgacagcgcctg | twinPE-mediated insertion of attP_fwd in AAVS1 downstream of H2B_EGFP sequences |
| AAVS1_B3903b          | gcgactectggaagtggcca  | gtctgtgcaaccaccggtctcagtggtgtacgggtacaaaacctccactccagg | twinPE-mediated insertion of attP_fwd in AAVS1 downstream of H2B_EGFP sequences |

**ED Figure 9c - IDS and IDS2 pegRNA screen**

| pegRNA                             | spacer sequence       | 3' extension                                               | Edits made by the specified pegRNA |
|------------------------------------|-----------------------|------------------------------------------------------------|------------------------------------|
| IDS2_A1_a_attP_rev                 | gacacaaaaactgccacagg  | taccgtacaccactgagaccgcggtgttgaccagacaaaacctgtggcagtta      | A1B2 (attP rev)                    |
| IDS2_A1_a_attP_fwd                 | gacacaaaaactgccacagg  | gtctgtcaaccaccggtctcagtggtgtacgggtacaaaacctgtggcagtta      | A1B2 (attP fwd)                    |
| IDS2_A1_c_attP_rev                 | gacacaaaaactgccacagg  | taccgtacaccactgagaccgcggtgttgaccagacaaaacctgtggcagtttta    | A1B3 (attP rev); A1B4 (attP rev)   |
| IDS2_A1_c_attP_fwd                 | gacacaaaaactgccacagg  | gtctgtcaaccaccggtctcagtggtgtacgggtacaaaacctgtggcagtttta    | A1B3 (attP fwd); A1B4 (attP fwd)   |
| IDS2_A4_b_attP_rev                 | gcactcatttctccaagctc  | taccgtacaccactgagaccgcggtgttgaccagacaaaacctcttgaggaaa      | A4B7 (attP rev)                    |
| IDS2_A4_b_attP_fwd                 | gcactcatttctccaagctc  | gtctgtcaaccaccggtctcagtggtgtacgggtacaaaacctcttgaggaaa      | A4B7 (attP fwd)                    |
| IDS2_B2_a_attP_rev                 | gtaggtacaggacagggcag  | gtctgtcaaccaccggtctcagtggtgtacgggtacaaaacctccctgtcc        | A1B2 (attP rev)                    |
| IDS2_B2_a_attP_fwd                 | gtaggtacaggacagggcag  | taccgtacaccactgagaccgcggtgttgaccagacaaaacctccctgtcc        | A1B2 (attP fwd)                    |
| IDS2_B3_a_attP_rev                 | gagataggtaggtacaggaca | tctgtcaaccaccggtctcagtggtgtacgggtacaaaacctctgtacct         | A1B3 (attP rev)                    |
| IDS2_B3_a_attP_fwd                 | gagataggtaggtacaggaca | taccgtacaccactgagaccgcggtgttgaccagacaaaacctctgtacct        | A1B3 (attP fwd)                    |
| IDS2_B4_b_attP_rev                 | gtgaaaagataggtaggtac  | gtctgtcaaccaccggtctcagtggtgtacgggtacaaaacctctctactatcta    | A1B4 (attP rev)                    |
| IDS2_B4_b_attP_fwd                 | gtgaaaagataggtaggtac  | taccgtacaccactgagaccgcggtgttgaccagacaaaacctctctactatcta    | A1B4 (attP fwd)                    |
| IDS2_B7_b_attP_rev                 | gttatggtttactccatcta  | gtctgtcaaccaccggtctcagtggtgtacgggtacaaaaccttgagtaaacct     | A4B7 (attP rev)                    |
| IDS2_B7_b_attP_fwd                 | gttatggtttactccatcta  | taccgtacaccactgagaccgcggtgttgaccagacaaaaccttgagtaaacct     | A4B7 (attP fwd)                    |
| IDS_C2_c_attB_rev                  | gttttggttaccctatcta   | atgatcctgacagcggagaccgctcgtcgcacaagccataggtgtaaacca        | C2D2 (attB rev); C2D2 (attB fwd)   |
| IDS_C2_c_attB_fwd                  | gttttggttaccctatcta   | ggctgtcgcagcagcggcgtctccgtcgcaggatcatatagggtaaacca         | C2D1 (attB fwd); C2D2 (attB fwd)   |
| IDS_D1_b_attB_rev                  | gctgtggaactgcaacacact | ggctgtcgcagcagcggcgtctccgtcgcaggatcatgtgttcagtt            | C2D1 (attB rev)                    |
| IDS_D1_b_attB_fwd                  | gctgtggaactgcaacacact | atgatcctgacagcggagaccgctcgtcgcacaagccgtgttcagtt            | C2D1 (attB fwd)                    |
| IDS_D2_c_attB_rev                  | gtgccactaacagtgagctg  | ggctgtcgcagcagcggcgtctccgtcgcaggatcatctcactgttaggt         | C2D2 (attB rev)                    |
| IDS_D2_c_attB_fwd                  | gtgccactaacagtgagctg  | atgatcctgacagcggagaccgctcgtcgcacaagccctcactgttaggt         | C2D2 (attB fwd)                    |
| IDS2_A1_a_attP_rev_Ev oPreQ1_motif | gacacaaaaactgccacagg  | taccgtacaccactgagaccgcggtgttgaccagacaaaacctgtggcagttaaatt  | A1B2 (attP rev)                    |
| IDS2_A1_a_attP_fwd_Ev oPreQ1_motif | gacacaaaaactgccacagg  | tccggtgtctatctagttacgcgttaaaccaactagaa                     | A1B2 (attP fwd)                    |
| IDS2_A1_c_attP_rev_Ev oPreQ1_motif | gacacaaaaactgccacagg  | gtctgtcaaccaccggtctcagtggtgtacgggtacaaaacctgtggcagttaaatt  | A1B3 (attP rev); A1B4 (attP rev)   |
| IDS2_A1_c_attP_fwd_Ev oPreQ1_motif | gacacaaaaactgccacagg  | atgcgcggttctatctagttacgcgttaaaccaactagaa                   | A1B3 (attP fwd); A1B4 (attP fwd)   |
| IDS2_A4_b_attP_rev_Ev oPreQ1_motif | gcactcatttctccaagctc  | taccgtacaccactgagaccgcggtgttgaccagacaaaacctcttgaggaaaacata | A4B7 (attP rev)                    |
| IDS2_A4_b_attP_fwd_Ev oPreQ1_motif | gcactcatttctccaagctc  | ataacgcggttctatctagttacgcgttaaaccaactagaa                  | A4B7 (attP fwd)                    |
| IDS2_B2_a_attP_rev_Ev oPreQ1_motif | gtaggtacaggacagggcag  | gtctgtcaaccaccggtctcagtggtgtacgggtacaaaacctcttgaggaaaacata | A1B2 (attP rev)                    |
| IDS2_B2_a_attP_fwd_Ev oPreQ1_motif | gtaggtacaggacagggcag  | taatacgcggttctatctagttacgcgttaaaccaactagaa                 | A1B2 (attP fwd)                    |
| IDS2_B3_a_attP_rev_Ev oPreQ1_motif | gagataggtaggtacaggaca | gtctgtcaaccaccggtctcagtggtgtacgggtacaaaacctccctgtccctcatag | A1B3 (attP rev)                    |
| IDS2_B3_a_attP_fwd_Ev oPreQ1_motif | gagataggtaggtacaggaca | tccggttctatctagttacgcgttaaaccaactagaa                      | A1B3 (attP fwd)                    |
| IDS2_B4_b_attP_rev_Ev oPreQ1_motif | gtgaaaagataggtaggtac  | gtctgtcaaccaccggtctcagtggtgtacgggtacaaaacctctctacttaaaga   | A1B4 (attP rev)                    |
| IDS2_B4_b_attP_fwd_Ev oPreQ1_motif | gtgaaaagataggtaggtac  | atccgcggttctatctagttacgcgttaaaccaactagaa                   | A1B4 (attP fwd)                    |

|                                   |                        |                                                              |                                                                    |
|-----------------------------------|------------------------|--------------------------------------------------------------|--------------------------------------------------------------------|
| IDS2_B4_b_attP_fwd_EvoPreQ1_motif | gtgaaagataggttaggtac   | taccgtacaccactgagaccgcggtgtgaccagacaaacctctactatctaataa      | A1B4 (attP fwd)                                                    |
| IDS2_B7_b_attP_rev_EvoPreQ1_motif | gttatggtttactccatcta   | atgccggttctactgtattacgcggttaaccaactagaa                      | A4B7 (attP rev)                                                    |
| IDS2_B7_b_attP_fwd_EvoPreQ1_motif | gttatggtttactccatcta   | gtctgtcaaccaccgcggtctcagtggtgtacggtacaacctatggagtaaacccc     | A4B7 (attP fwd)                                                    |
| IDS_C2_c_attB_rev_EvoPreQ1_motif  | gttttggttaccctatcta    | taccgtacaccactgagaccgcggtgtgaccagacaaacctatggagtaaacccc      | A4B7 (attP fwd)                                                    |
| IDS_C2_c_attB_fwd_EvoPreQ1_motif  | gttttggttaccctatcta    | ctttctcgggttctactgtattacgcggttaaccaactagaa                   | C2D2 (attB rev); C2D2 (attB fwd); C2D2 (attB fwd); C2D2 (attB fwd) |
| IDS_D1_b_attB_rev_EvoPreQ1_motif  | gtgtggaactgcaacacact   | atgatcctgacgacggagaccgctcgtcgcacaagccatagggtaaaccattttaa     | C2D1 (attB rev)                                                    |
| IDS_D1_b_attB_fwd_EvoPreQ1_motif  | gtgtggaactgcaacacact   | ccgcggttctactgtattacgcggttaaccaactagaa                       | C2D1 (attB fwd)                                                    |
| IDS_D2_c_attB_rev_EvoPreQ1_motif  | gtgccacctaacagtggagctg | ggctgtgcgacgacggcggtctccgctcgcaggatcatatagggtaaaccattttaaaga | C2D2 (attB rev)                                                    |
| IDS_D2_c_attB_fwd_EvoPreQ1_motif  | gtgccacctaacagtggagctg | cgcggttctactgtattacgcggttaaccaactagaa                        | C2D2 (attB fwd)                                                    |

**ED Figure 10a - twinPE mediated attB insertion in CCR5 region 2**

| pegRNA     | spacer sequence        | 3' extension                                         | Edits made by the specified pegRNA |
|------------|------------------------|------------------------------------------------------|------------------------------------|
| CCR5_2_C1c | gatgcagagtcagcagaact   | atgatcctgacgacggagaccgctcgtcgcacaagccctctgctactctg   | indicated on the x-axis            |
| CCR5_2_D1c | ggtgcttgatgcttttcaa    | ggcttctgacgacggcggtctccgctcgtcaggatcataaaagacatcaage | indicated on the x-axis            |
| CCR5_2_C2b | gaaaagacatcaagcacaga   | atgatcctgacgacggagaccgctcgtcgcacaagccgctctgctgctg    | indicated on the x-axis            |
| CCR5_2_D4c | gacccctcagttttcagct    | ggcttctgacgacggcggtctccgctcgtcaggatcattgaaatactgagg  | indicated on the x-axis            |
| CCR5_2_C2c | gaaaagacatcaagcacaga   | atgatcctgacgacggagaccgctcgtcgcacaagccgctctgctgctg    | indicated on the x-axis            |
| CCR5_2_D2a | gtgaaagacagcctggagtc   | ggcttctgacgacggcggtctccgctcgtcaggatcattccaggct       | indicated on the x-axis            |
| CCR5_2_C3b | ggttttaggtcaagaagaaga  | atgatcctgacgacggagaccgctcgtcgcacaagccctctcttgaccta   | indicated on the x-axis            |
| CCR5_2_D2b | gtgaaagacagcctggagtc   | ggcttctgacgacggcggtctccgctcgtcaggatcattccaggctg      | indicated on the x-axis            |
| CCR5_2_D4a | gtgccacctaacagtggagctg | atgatcctgacgacggagaccgctcgtcgcacaagccgctctggtgagac   | indicated on the x-axis            |
| CCR5_2_C5c | cacagctcaccagactcc     | ggcttctgacgacggcggtctccgctcgtcaggatcattccaggctg      | indicated on the x-axis            |
| CCR5_2_D3b | gtatttcagctgggatggga   | atgatcctgacgacggagaccgctcgtcgcacaagccctctggtgagac    | indicated on the x-axis            |
| CCR5_2_D4b | gacccctcagttttcagct    | ggcttctgacgacggcggtctccgctcgtcaggatcattccaggctg      | indicated on the x-axis            |
| CCR5_2_C6c | gtgagatttgaatacacg     | atgatcctgacgacggagaccgctcgtcgcacaagccgcttattcataaact | indicated on the x-axis            |
| CCR5_2_D5c | gaacccatgaaatgactact   | ggcttctgacgacggcggtctccgctcgtcaggatcatatgatttcatggg  | indicated on the x-axis            |
| CCR5_2_C7c | gcacacatgagacttaggtg   | atgatcctgacgacggagaccgctcgtcgcacaagccctctgattctcatgt | indicated on the x-axis            |
| CCR5_2_D6b | gatgtgctaaatgctgcctg   | ggcttctgacgacggcggtctccgctcgtcaggatcattccaggct       | indicated on the x-axis            |

**ED Figure 10b - twinPE in multiple human cells**

| pegRNA                       | spacer sequence        | 3' extension                                            | Edits made by the specified pegRNA |
|------------------------------|------------------------|---------------------------------------------------------|------------------------------------|
| IDS2_A4_b_attP_rev           | gcactcatttctccaagctc   | taccgtacaccactgagaccgcggtgtgaccagacaaacctctggaggaaa     | IDS2 (attP rev)                    |
| IDS2_B7_b_attP_rev           | gttatggtttactccatcta   | gtctgtcaaccaccgcggtctcagtggtgtacggtacaacctatggagtaaacct | IDS2 (attP rev)                    |
| IDS_C2_c_attB_fwd            | gttttggttaccctatcta    | ggcttctgacgacggcggtctccgctcgtcaggatcatatagggtaaacca     | IDS (attB fwd)                     |
| IDS_D2_c_attB_fwd            | gtgccacctaacagtggagctg | atgatcctgacgacggagaccgctcgtcgcacaagccctcactgttaggt      | IDS (attB fwd)                     |
| MYC_pegRNA_F1_22nt-insert    | gaggctattctgcccatttg   | aaatgatggtgatgattggtttatgggcaga                         | MYC (22-nt)                        |
| MYC_pegRNA_R1_22nt-insert    | gctttaccgcatccagttc    | aacaccatcatcaccatcattctggatcggggt                       | MYC (22-nt)                        |
| TIMM44_pegRNA_F1_22nt-insert | gtfgccagcctttctccag    | ttcagagaagagatggaagacagagaagggctgg                      | TIMM44 (22-nt)                     |
| TIMM44_pegRNA_R1_22nt-insert | gtcctgtcctgggcatcg     | tgcttccatctcttctgaatgcccacg                             | TIMM44 (22-nt)                     |
| CCR5_2_C5c                   | cacagctcaccagactcc     | atgatcctgacgacggagaccgctcgtcgcacaagccgctctggtgagac      | CCR5_a (attB fwd)                  |
| CCR5_2_D3b                   | gtatttcagctgggatggga   | ggcttctgacgacggcggtctccgctcgtcaggatcattccaggct          | CCR5_a (attB fwd)                  |
| CCR5_2_C2c                   | gaaaagacatcaagcacaga   | atgatcctgacgacggagaccgctcgtcgcacaagccgctctgctgctt       | CCR5_b (attB fwd)                  |
| CCR5_2_D2a                   | gtgaaagacagcctggagtc   | ggcttctgacgacggcggtctccgctcgtcaggatcattccaggct          | CCR5_b (attB fwd)                  |

**ED figure 10c – Editing activity of Cas9 nickase, PE2-dead RT variant, and PE2**

| pegRNA                       | spacer sequence      | 3' extension                                               | Edits made by the specified pegRNA |
|------------------------------|----------------------|------------------------------------------------------------|------------------------------------|
| PAH_E7.2_55_EvoPreQ1         | gtggtttccgctccgacctg | acgcggaatcgagacccccagaaagtctctactgctcaagagcccggcaacggg     | Also used in Fig. 2c               |
| PAH_E7.6_56_EvoPreQ1         | gtctgatgtactgtgtgcag | tcggaggcgtctctcttctgacgggtctctatctattacgcggttaaccaactagaaa | Also used in Fig. 2c               |
| AAVS1_A3835a                 | gacgtcacggcgctgcccc  | gggctcttgacgagtagacttctgggggtctcgcattccgctggtttcattgcaaca  | Also used in ED Fig. 3             |
| AAVS1_B3930a                 | ggacttccagctgtcatcg  | cagtaactctctcttggacgcttctatgttacgcggttaaccaactagaaa        | Also used in ED Fig. 3             |
| CCR5_2_C2_c_attP_fwd_pegRNA1 | gaaaagacatcaagcacaga | taccgtacaccactgagaccgcggtgtgaccagacaaacctggcagcgcc         |                                    |
| CCR5_2_D2_a_attP_rev_pegRNA2 | gtgaaagacagcctggagtc | gtctgtcaaccaccgcggtctcagtggtgtacggtacaaccttgcacactg        |                                    |
| PE3_CCR5_1_F414a_34_FKBP108  | ggtacatctgattgtcagg  | agggttctgtgtgcaaccaccggtctcagtggtgtacgggtacaacctccaggct    |                                    |
|                              |                      | tactgtccctcttgggctcactatctgcccgaatttttccatcttcaagcatcccg   | Also used in ED Fig. 1a            |
|                              |                      | gtgtatgtcaccaccaggtctgcccgcgttggggaagtgcgcccgtctcctggg     |                                    |
|                              |                      | gagatggtttccactgcatcctccacaatga                            |                                    |

|                             |                      |                                                                                                                                                          |                         |
|-----------------------------|----------------------|----------------------------------------------------------------------------------------------------------------------------------------------------------|-------------------------|
| PE3_CCR5_1_F414a_29_FKBP108 | ggtacatctcattgctcagg | tccccctctgggctcactatgctgcccacaaattcttccatcttcaagcatcccgggtgta<br>gtgcaccacgcaggctctggccgccttggggaaaggtgcgccctctcctgggggaga<br>tggttccacctgactccgacaatcga | Also used in ED Fig. 1a |
| IDS2_DF_A4_b_attP_fw_d      | gcactcatttctccaagctc | gtctgtgcaaccaccgcgctctcagtggtgtacggfacaacaccttggaggaaaa                                                                                                  | Also used in Fig. 4b    |
| IDS2_DF_B7_b_attP_fw_d      | ggtatggtttactccatcta | taccgtacaccactgagaccgcggtgtgaccagacaaacctatggagtaaacc                                                                                                    | Also used in Fig. 4b    |

**Supplementary Note 1 - TwinPE PCR bias assessment  
pegRNA**

|                      | <b>spacer sequence</b> | <b>3' extension</b>                                    | <b>Edits made by the specified pegRNA</b>                                   |
|----------------------|------------------------|--------------------------------------------------------|-----------------------------------------------------------------------------|
| CCR5_A223c           | gtcatcctgataaactgcaaa  | atgatcctgacgacggagaccgcccgtcgtcgacaagccgcagtttatcagg   | A223c+B272a;<br>A223c+B291b;<br>A223c+B305a;<br>A223c+B326b;<br>A223c+B330b |
| CCR5_B272a           | gaaggaaaaaacgggtcagaga | ggctgtgacgacggcggtctccgtcgtcaggatcatctgacctg           | A223c+B272a                                                                 |
| CCR5_B291b           | gcccagaaggggacagtaaga  | ggctgtgacgacggcggtctccgtcgtcaggatcattactgtccctt        | A223c+B291b                                                                 |
| CCR5_B305a           | ggcagcatagtgagcccaga   | ggctgtgacgacggcggtctccgtcgtcaggatcatggctcact           | A223c+B305a                                                                 |
| CCR5_B326b           | gattccaaagtcactggg     | ggctgtgacgacggcggtctccgtcgtcaggatcatagtgaggactttg      | A223c+B326b;<br>A260c+B326b                                                 |
| CCR5_B330b           | gtgtattccaaagtcccac    | ggctgtgacgacggcggtctccgtcgtcaggatcatggactttgaa         | A223c+B330b                                                                 |
| CCR5_A260c           | gtgacatctacctgctcaacc  | atgatcctgacgacggagaccgcccgtcgtcgacaagcctgagcaggtatagat | A260c+B305c;<br>A260c+B326b;<br>A260c+B330c                                 |
| CCR5_B305c           | ggcagcatagtgagcccaga   | ggctgtgacgacggcggtctccgtcgtcaggatcatggctcactatgc       | A260c+B305c                                                                 |
| CCR5_B330c           | gtgtattccaaagtcccac    | ggctgtgacgacggcggtctccgtcgtcaggatcatggactttgaaat       | A260+B330c                                                                  |
| CCR5_A325b           | gtcactatgctgcccag      | atgatcctgacgacggagaccgcccgtcgtcgacaagccggcgagcat       | A325b+B414a                                                                 |
| CCR5_B414a           | ggtacatctcattgacagg    | ggctgtgacgacggcggtctccgtcgtcaggatcatgacaatcga          | A325b+B414a;<br>A360b+B414a                                                 |
| CCR5_A360b           | gacaatgtgtaactcttgac   | atgatcctgacgacggagaccgcccgtcgtcgacaagccaaagtgtgacac    | A360b+B414a                                                                 |
| CCR5_A506c           | gacaagtgatcacttggg     | atgatcctgacgacggagaccgcccgtcgtcgacaagccaaagtgtacactt   | A506c+B584a                                                                 |
| CCR5_B584a           | gtatggaataagagctgc     | ggctgtgacgacggcggtctccgtcgtcaggatcatgctctcatt          | A506c+B584a                                                                 |
| CCR5_A509a           | gaagtgtgactcactgggtg   | atgatcctgacgacggagaccgcccgtcgtcgacaagcccaagtga         | A509a+B535c;<br>A509a+B584a                                                 |
| CCR5_B535c           | gatctgtaaaagtattcc     | ggctgtgacgacggcggtctccgtcgtcaggatcatatctttaccag        | A509_B535c                                                                  |
| CCR5_A531c           | gctgtgttgcgctctccc     | atgatcctgacgacggagaccgcccgtcgtcgacaagccagagacgcaaaa    | A531c+B584b                                                                 |
| CCR5_B584b           | gtatgaaaaatgagagctgc   | ggctgtgacgacggcggtctccgtcgtcaggatcatgctctcattttc       | A531c+B584b                                                                 |
| CCR5_2_C2b           | gaaaagacatcaagcacaga   | atgatcctgacgacggagaccgcccgtcgtcgacaagccgtgcttgatgctc   | C2b+D4c                                                                     |
| CCR5_2_D4c           | gacccctcagttattcagct   | ggctgtgacgacggcggtctccgtcgtcaggatcattgaaatactgaggg     | C2b+D4c                                                                     |
| CCR5_2_C2c           | gaaaagacatcaagcacaga   | atgatcctgacgacggagaccgcccgtcgtcgacaagccgtgcttgatgctt   | C2c+D2a                                                                     |
| CCR5_2_D2a           | gtgaaagacagcctggagtc   | ggctgtgacgacggcggtctccgtcgtcaggatcattccaggct           | C2c+D2a                                                                     |
| CCR5_2_C3b           | ggtttaggctcaagaagaaga  | atgatcctgacgacggagaccgcccgtcgtcgacaagccctctttgaccta    | C3b+D2b; C3b+D4a                                                            |
| CCR5_2_D2b           | gtgaaagacagcctggagtc   | ggctgtgacgacggcggtctccgtcgtcaggatcattccaggctgt         | C3b+D2b                                                                     |
| CCR5_2_D4a           | gacccctcagttattcagct   | ggctgtgacgacggcggtctccgtcgtcaggatcattgaaatactg         | C3b+D4a                                                                     |
| CCR5_2_C4b           | gatgattgtgtaaaagga     | atgatcctgacgacggagaccgcccgtcgtcgacaagccctttaccacaatc   | C4b+D2a                                                                     |
| CCR5_2_D2a           | gtgaaagacagcctggagtc   | ggctgtgacgacggcggtctccgtcgtcaggatcattccaggct           | C4b+D2a                                                                     |
| CCR5_2_C5c           | cacagctcaccagactcc     | atgatcctgacgacggagaccgcccgtcgtcgacaagccgtctgggtgagac   | C5c+D3b; C5c+D4b                                                            |
| CCR5_2_D3b           | gtatttcagctgggatggga   | ggctgtgacgacggcggtctccgtcgtcaggatcatcctccagct          | C5c+D3b                                                                     |
| CCR5_2_D4b           | gacccctcagttattcagct   | ggctgtgacgacggcggtctccgtcgtcaggatcattgaaatactgag       | C5c+D4b                                                                     |
| HEK3_DF_A_SA_del77nt | ggcccagactgagcacgtga   | tcctctgcccactcagctgctcagctg                            | SA (Δ 77nt)                                                                 |
| HEK3_DF_B_SA_del77nt | gtcaaccagatcccgggtgc   | tgatggcagagaccgggatactgg                               | SA (Δ 77nt)                                                                 |
| HEK3_DF_A_SA_del56nt | ggcccagactgagcacgtga   | tggaggaaagcagggtctctctctgcccacacgtgctcagctg            | SA (Δ 56nt)                                                                 |
| HEK3_DF_B_SA_del56nt | gtcaaccagatcccgggtgc   | tgatggcagagaaaaggaaccctgcttccaccgggatactgg             | SA (Δ 56nt)                                                                 |
| HEK3_DF_A_HA_del64nt | ggcccagactgagcacgtga   | tgacaggagctgcatcctctgcccacacgtgctcagctg                | HA (Δ 64nt)                                                                 |
| HEK3_DF_B_HA_del64nt | gtcaaccagatcccgggtgc   | tgatggcagagatgacgctcctgcaccgggatactgg                  | HA (Δ 64nt)                                                                 |
| HEK3_DF_A_PD_del90nt | ggcccagactgagcacgtga   | gcccagcaaaactgtcaaccagatcccggctgctcagctg               | PD (Δ 90nt)                                                                 |
| HEK3_DF_B_PD_del90nt | gtcaaccagatcccgggtgc   | gggtcaatccttggggcccagactgagcacgggatactgg               | PD (Δ 90nt)                                                                 |

## Supplementary Table 2. Sequences of primers used for mammalian cell genomic DNA amplification and HTS

Primers (All sequences are shown in 5' to 3' orientation)

### Figure 1

HEK3\_fwd ACACTCTTCCCTACACGACGCTCTCCGATCTNNNNATGTGGGCTGCCTAGAAAAGG  
HEK3\_rev TGGAGTTCAGACGTGTGCTCTCCGATCTCCAGCCAAACTTGCAACC

### Figure 2

PAH\_AVA1686 ACACTCTTCCCTACACGACGCTCTCCGATCTNNNNCCATCACCATTGGCTGGGAT  
PAH\_AVA1687 TGGAGTTCAGACGTGTGCTCTCCGATCTAGTGGAGGAGAGGCACTGAA  
PAH\_AVA1696 ACACTCTTCCCTACACGACGCTCTCCGATCTNNNNACCTAAAGTCTCCTAGTGCCT  
PAH\_AVA1697 TGGAGTTCAGACGTGTGCTCTCCGATCTCCAGCAATGAACCCAAACCTC  
HEK3\_fwd ACACTCTTCCCTACACGACGCTCTCCGATCTNNNNATGTGGGCTGCCTAGAAAAGG  
HEK3\_rev TGGAGTTCAGACGTGTGCTCTCCGATCTCCAGCCAAACTTGCAACC  
DMD\_UMI\_fwd1 ACACTCTTCCCTACACGACGCTCTCCGATCTNNNNNNNNNNNNNNNGCTGGCCAGTTTACTAACAAT  
DMD\_UMI\_fwd2 ACACTCTTCCCTACACGACGCTCTCCGATCTNNNNNNNNNNNNNNNCAGAAAGAAGATCTTATCCCATC  
TTG  
DMD\_rev0 TGGAGTTCAGACGTGTGCTCTCCGATCTGGCTACTTTTGTATTGTCATT

### Figure 3

AAVS1\_AVA1713 TGGAGTTCAGACGTGTGCTCTCCGATCTCCAGAGCAGGGTCCCGCTTC  
AAVS1\_AVA1717 ACACTCTTCCCTACACGACGCTCTCCGATCTNNNNACGGGGCTCAGTCTGAAGAG  
AAVS1\_AVA1651 ACACTCTTCCCTACACGACGCTCTCCGATCTNNNNGCCAAGGACTCAAACCCAGA  
AAVS1\_AVA1652 TGGAGTTCAGACGTGTGCTCTCCGATCTCCGATCTCCGTCGCTCAGTTTACCT  
AAVS1\_AVA1653 ACACTCTTCCCTACACGACGCTCTCCGATCTNNNNAACTGCTTCTCCTTTGGGAA  
AAVS1\_AVA1715 TGGAGTTCAGACGTGTGCTCTCCGATCTTCCGATGCCAGAACCTCTAAGGT  
AAVS1\_AVA1655 ACACTCTTCCCTACACGACGCTCTCCGATCTNNNNATCCTCTCTGGCTCCATCGTA  
AAVS1\_AVA1656 TGGAGTTCAGACGTGTGCTCTCCGATCTTCCACTCAGGACAGCATGTTT  
AAVS1\_AVA1707 ACACTCTTCCCTACACGACGCTCTCCGATCTNNNNCGCCGGAACTGCCGTGGC  
AAVS1\_AVA1710 TGGAGTTCAGACGTGTGCTCTCCGATCTGAGGAGGCCCTCATCTGGCG  
CCR5\_AVA1678 ACACTCTTCCCTACACGACGCTCTCCGATCTNNNNAAATCAATGTGAAGCAAATCGCAGC  
CCR5\_AVA1679 TGGAGTTCAGACGTGTGCTCTCCGATCTTCGATTGTCAGGAGGATGATGAA  
CCR5\_AVA1680 ACACTCTTCCCTACACGACGCTCTCCGATCTNNNNTCCTTCTACTGTCCCCTTCTGGCG  
CCR5\_AVA1681 TGGAGTTCAGACGTGTGCTCTCCGATCTGCAAAACACAGCATGGACGAC  
CCR5\_AVA1682 ACACTCTTCCCTACACGACGCTCTCCGATCTNNNNACAATCGATAGGTACCTGGCTGTC  
CCR5\_AVA1683 TGGAGTTCAGACGTGTGCTCTCCGATCTACCAGCCCCAAGATGACTAT  
ALB\_AVA1760 ACACTCTTCCCTACACGACGCTCTCCGATCTNNNNNTTGGCATTATTTCTAAAAATGGCATA  
ALB\_AVA1759 TGGAGTTCAGACGTGTGCTCTCCGATCTTCTATCAACAGCAACCAAGAAGACAGACT

### Figure 4

IDS\_AVA1763 ACACTCTTCCCTACACGACGCTCTCCGATCTNNNNCTGAAAACCTGAGCTTGGAGG  
IDS\_AVA1764 TGGAGTTCAGACGTGTGCTCTCCGATCTGTCTACTCCAGCTTAATGGAAGTGG  
IDS\_AVA1765 ACACTCTTCCCTACACGACGCTCTCCGATCTNNNNAGAGAAGATGTGGAAATGCCTCAC  
IDS\_AVA1766 TGGAGTTCAGACGTGTGCTCTCCGATCTAAATCAACATGAAGGGTTGTGTTGT  
IDS\_AVA1769 ACACTCTTCCCTACACGACGCTCTCCGATCTNNNNNGTCCACACATGCGTTCCCTC  
IDS\_AVA1770 TGGAGTTCAGACGTGTGCTCTCCGATCTGGCATGAAGGGTTGTTTTAATTGA  
IDS\_UMI\_junc1\_fwd ACACTCTTCCCTACACGACGCTCTCCGATCTNNNNNNNNNNNNNNCCCTGTCTGTACCTACCTAT  
IDS\_junc2\_fwd ACACTCTTCCCTACACGACGCTCTCCGATCTNNNNNTTGAATCATGCCCTACGAGG  
IDS\_universal\_rev TGGAGTTCAGACGTGTGCTCTCCGATCTCTCAAATTTACCCGTGGCAGC

### ED Figure 1 - Long tPE insertions at CCR5

CCR5\_AVA1682 ACACTCTTCCCTACACGACGCTCTCCGATCTNNNNACAATCGATAGGTACCTGGCTGTC  
CCR5\_AVA1683 TGGAGTTCAGACGTGTGCTCTCCGATCTACCAGCCCCAAGATGACTAT

### ED Figure 2 - pegRNAs screen at PAH

PAH\_AVA1684 ACACTCTTCCCTACACGACGCTCTCCGATCTNNNNNTGTCCATGGAGGTTAACAGGA  
PAH\_AVA1685 TGGAGTTCAGACGTGTGCTCTCCGATCTACATGGAAGTTTGTACGACAT  
PAH\_AVA1686 ACACTCTTCCCTACACGACGCTCTCCGATCTNNNNCCATCACCATTGGCTGGGAT  
PAH\_AVA1687 TGGAGTTCAGACGTGTGCTCTCCGATCTAGTGGAGGAGAGGCACTGAA  
PAH\_AVA1689 TGGAGTTCAGACGTGTGCTCTCCGATCTGGTAAGAGGAAGGGAGGGGA  
PAH\_AVA1690 ACACTCTTCCCTACACGACGCTCTCCGATCTNNNNAGAGACCCCATTCAAAGCA  
PAH\_AVA1691 TGGAGTTCAGACGTGTGCTCTCCGATCTGCAGGACTCTTCATGCTGGT  
PAH\_AVA1696 ACACTCTTCCCTACACGACGCTCTCCGATCTNNNNACCTAAAGTCTCCTAGTGCCT  
PAH\_AVA1697 TGGAGTTCAGACGTGTGCTCTCCGATCTCCAGCAATGAACCCAAACCTC  
PAH\_AVA1702 ACACTCTTCCCTACACGACGCTCTCCGATCTNNNNGGCCAAGTACTAGGTTGGTTCT  
PAH\_AVA1703 TGGAGTTCAGACGTGTGCTCTCCGATCTTAACTGGCTCCAGGGGAGT  
PAH\_exon10\_fwd ACACTCTTCCCTACACGACGCTCTCCGATCTNNNNAGACACACCCCAAAAATAATGC  
PAH\_exon10\_rev TGGAGTTCAGACGTGTGCTCTCCGATCTTGAAGACACAATAATGTTTTT  
PAH\_exon11\_fwd ACACTCTTCCCTACACGACGCTCTCCGATCTNNNNCAGGGAATACTGATCCTGAT  
PAH\_exon11\_rev TGGAGTTCAGACGTGTGCTCTCCGATCTCAACCACCCACAGATGAGT  
PAH\_exon12\_fwd ACACTCTTCCCTACACGACGCTCTCCGATCTNNNNAGAGGTGTCCGTGTTCTTAA  
PAH\_exon12\_rev TGGAGTTCAGACGTGTGCTCTCCGATCTCGATGGTAGGGAAAGACAGT

### ED Figure 3 - pegRNA screen at CCR5 region 1

CCR5\_AVA1678 ACACTCTTCCCTACACGACGCTCTCCGATCTNNNNAAATCAATGTGAAGCAAATCGCAGC



CCR5\_AVA1679 TGGAGTTCAGACGTGTGCTCTCCGATCTCCGATTGTCAGGAGGATGATGAA  
 CCR5\_AVA1680 ACACTCTTCCCTACACGACGCTCTCCGATCTNNNNTCCTTCTTACTGTCCCCTTCTGGGC  
 CCR5\_AVA1681 TGGAGTTCAGACGTGTGCTCTCCGATCTGCAAACACAGCATGGACGAC  
 CCR5\_AVA1682 ACACTCTTCCCTACACGACGCTCTCCGATCTNNNNACAATCGATAGGTACCTGGCTGTC  
 CCR5\_AVA1683 TGGAGTTCAGACGTGTGCTCTCCGATCTACCAGCCCCAAGATGACTAT

**ED Figure 4 - pegRNA screen at AAVS1**

AAVS1\_AVA1713 TGGAGTTCAGACGTGTGCTCTCCGATCTCCAGAGCAGGGTCCCGCTTC  
 AAVS1\_AVA1717 ACACTCTTCCCTACACGACGCTCTCCGATCTNNNNACGGGGCTCAGTCTGAAGAG  
 AAVS1\_AVA1651 ACACTCTTCCCTACACGACGCTCTCCGATCTNNNNGCCAAGGACTCAAACCCAGA  
 AAVS1\_AVA1652 TGGAGTTCAGACGTGTGCTCTCCGATCTCCGTCGCTCAGTTTACCT  
 AAVS1\_AVA1653 ACACTCTTCCCTACACGACGCTCTCCGATCTNNNNAACTGCTTCTCCTCTTGGGAA  
 AAVS1\_AVA1715 TGGAGTTCAGACGTGTGCTCTCCGATCTTCCCTGCCAGAACCTCTAAGGT  
 AAVS1\_AVA1655 ACACTCTTCCCTACACGACGCTCTCCGATCTNNNNATCCTCTCTGGCTCCATCGTA  
 AAVS1\_AVA1656 TGGAGTTCAGACGTGTGCTCTCCGATCTTCCACTTCAGGACAGCATGTTT  
 AAVS1\_AVA1707 ACACTCTTCCCTACACGACGCTCTCCGATCTNNNNCGCCGGAACTGCCGCTGGC  
 AAVS1\_AVA1710 TGGAGTTCAGACGTGTGCTCTCCGATCTGAGGAGGCCCTCATCTGGCG

**ED Figure 5 - Comparison of twinPE- and PE3-mediated attB insertion at CCR5 region 1**

CCR5\_AVA1680 ACACTCTTCCCTACACGACGCTCTCCGATCTNNNNTCCTTCTTACTGTCCCCTTCTGGGC  
 CCR5\_AVA1681 TGGAGTTCAGACGTGTGCTCTCCGATCTGCAAACACAGCATGGACGAC  
 CCR5-2\_fwd2 ACACTCTTCCCTACACGACGCTCTCCGATCTNNNNAGAGGAGTCAAGAGAGAATCCC  
 CCR5-2\_rev2 TGGAGTTCAGACGTGTGCTCTCCGATCTTCCCTAGACCTCATACCTCGT

**ED Figure 6b - HTS Junction Purity**

CCR5\_AVA1680 ACACTCTTCCCTACACGACGCTCTCCGATCTNNNNTCCTTCTTACTGTCCCCTTCTGGGC  
 CCR5\_AVA1682 ACACTCTTCCCTACACGACGCTCTCCGATCTNNNNACAATCGATAGGTACCTGGCTGTC  
 AAVS1\_AVA1717 ACACTCTTCCCTACACGACGCTCTCCGATCTNNNNACGGGGCTCAGTCTGAAGAG  
 AAVS1\_AVA1707 ACACTCTTCCCTACACGACGCTCTCCGATCTNNNNCGCCGGAACTGCCGCTGGC  
 Donor\_CJP140 TGGAGTTCAGACGTGTGCTCTCCGATCTGAACCTCAGGGTCAGCTTGC

**ED Figure 6c - HTS Junction Purity (the other donor-genome junction)**

CCR5\_AVA1681 TGGAGTTCAGACGTGTGCTCTCCGATCTGCAAACACAGCATGGACGAC  
 CCR5\_AVA1683 TGGAGTTCAGACGTGTGCTCTCCGATCTACCAGCCCCAAGATGACTAT  
 AAVS1\_AVA1713 TGGAGTTCAGACGTGTGCTCTCCGATCTCCAGAGCAGGGTCCCGCTTC  
 AAVS1\_AVA1710 TGGAGTTCAGACGTGTGCTCTCCGATCTGAGGAGGCCCTCATCTGGCG  
 Donor\_other\_fwd ACACTCTTCCCTACACGACGCTCTCCGATCTNNNNGGCAAGCTTACATCGAGATCC

**ED Figure 6e - Overlap reduction**

CCR5\_AVA1682 ACACTCTTCCCTACACGACGCTCTCCGATCTNNNNACAATCGATAGGTACCTGGCTGTC  
 CCR5\_AVA1683 TGGAGTTCAGACGTGTGCTCTCCGATCTACCAGCCCCAAGATGACTAT

**ED Figure 7b**

OT1\_fwd ACACTCTTCCCTACACGACGCTCTCCGATCTNNNNGGAAATAAGTTATCACAATGGGAAAT  
 OT1\_rev TGGAGTTCAGACGTGTGCTCTCCGATCTCGCGATTCTTAAAAGGAGAGG  
 OT2\_fwd ACACTCTTCCCTACACGACGCTCTCCGATCTNNNNCCATTATATTTTGAACAAAAGG  
 OT2\_rev TGGAGTTCAGACGTGTGCTCTCCGATCTGCATTGCACCTCATACATAACA  
 OT3\_fwd ACACTCTTCCCTACACGACGCTCTCCGATCTNNNNGCTGTGGTTATTCCCAGCTC  
 OT3\_rev TGGAGTTCAGACGTGTGCTCTCCGATCTGGGAACACTGGACAAAATCC  
 OT4\_fwd ACACTCTTCCCTACACGACGCTCTCCGATCTNNNNGGAAAGCTTTGACAAGTGAA  
 OT4\_rev TGGAGTTCAGACGTGTGCTCTCCGATCTGCCTACTTGCCTTCTTCTC  
 OT5\_fwd ACACTCTTCCCTACACGACGCTCTCCGATCTNNNNGCATTGCACCTCATACATAACA  
 OT5\_rev TGGAGTTCAGACGTGTGCTCTCCGATCTCCATTATATTTTGAACAAAAGG

**ED Figure 7c**

Donor\_CJP140 (with OT1\_fwd or OT2\_fwd) TGGAGTTCAGACGTGTGCTCTCCGATCTGAACCTCAGGGTCAGCTTGC  
 Donor\_fwd\_primer (with OT3\_rev, or OT4\_rev, or OT5\_rev) ACACTCTTCCCTACACGACGCTCTCCGATCTNNNNGAACTCAGGGTCAGCTTGC

**ED Figure 9**

IDS\_AVA1763 ACACTCTTCCCTACACGACGCTCTCCGATCTNNNNCTGAAAACCTGAGCTTGGAGG  
 IDS\_AVA1764 TGGAGTTCAGACGTGTGCTCTCCGATCTGTCTACTCCAGCTTAATGGAAGTGG  
 IDS\_AVA1765 ACACTCTTCCCTACACGACGCTCTCCGATCTNNNNAGAGAAGATGTGGAAATGCCTCAC  
 IDS\_AVA1766 TGGAGTTCAGACGTGTGCTCTCCGATCTAATCAACATGAAGGGTTGTGTTG  
 IDS\_AVA1769 ACACTCTTCCCTACACGACGCTCTCCGATCTNNNNGTCCACACATGCGTTCTC  
 IDS\_AVA1770 TGGAGTTCAGACGTGTGCTCTCCGATCTGGCATGAAGGGTTGTTTTAATTGA

**ED Figure 10**

CCR5-2\_Fwd1 ACACTCTTCCCTACACGACGCTCTCCGATCTNNNNGGTATTCGTGCAGCATATGAG  
 CCR5-2\_Rev1 TGGAGTTCAGACGTGTGCTCTCCGATCTTATTTAGCTGGGATGGGAAGG  
 CCR5-2\_fwd2 ACACTCTTCCCTACACGACGCTCTCCGATCTNNNNAGAGGAGTCAAGAGAGAATCCC  
 CCR5-2\_rev2 TGGAGTTCAGACGTGTGCTCTCCGATCTTCCCTAGACCTCATACCTCGT  
 CCR5-2\_Fwd3 ACACTCTTCCCTACACGACGCTCTCCGATCTNNNNACTGAATGCTTCTGACTTCATAG  
 CCR5-2\_Rev3 TGGAGTTCAGACGTGTGCTCTCCGATCTTTTGTCAATGCTTTGTCTCAGT  
 IDS\_AVA1765 ACACTCTTCCCTACACGACGCTCTCCGATCTNNNNAGAGAAGATGTGGAAATGCCTCAC  
 IDS\_AVA1766 TGGAGTTCAGACGTGTGCTCTCCGATCTAATCAACATGAAGGGTTGTGTTG

|             |                                                           |
|-------------|-----------------------------------------------------------|
| IDS_AVA1769 | ACACTCTTCCCTACACGACGCTCTTCCGATCTNNNNGTCCACACATGCGTTCCTC   |
| IDS_AVA1770 | TGGAGTTCAGACGTGTGCTCTCCGATCTGGCATGAAGGGTTGTTTTAATTGA      |
| CCR5-2_fwd2 | ACACTCTTCCCTACACGACGCTCTTCCGATCTNNNNAGAGGAGTCAGAGAGAATCCC |
| CCR5-2_rev2 | TGGAGTTCAGACGTGTGCTCTTCCGATCTTCCCTAGACCTCATACTCTCGT       |
| MYC_fwd     | ACACTCTTCCCTACACGACGCTCTTCCGATCTNNNNTTGCACTGGAACCTACAACAC |
| MYC_rev     | TGGAGTTCAGACGTGTGCTCTTCCGATCTGGCAGAAATCTCGAAAGG           |
| TIMM44_fwd  | ACACTCTTCCCTACACGACGCTCTTCCGATCTNNNNAGACCTGTACATTCGGGC    |
| TIMM44_rev  | TGGAGTTCAGACGTGTGCTCTTCCGATCTAAAAGCCAGTGTGCTC             |

**Supplementary Table 5 - TwinPE-mediated off-target genome editing**

|              |                                                           |
|--------------|-----------------------------------------------------------|
| HEK3_OT1_fwd | ACACTCTTCCCTACACGACGCTCTTCCGATCTNNNNTCCCTGTTGACCTGGAGAA   |
| HEK3_OT1_rev | TGGAGTTCAGACGTGTGCTCTTCCGATCTCACTGTACTTGCCCTGACCA         |
| HEK3_OT2_fwd | ACACTCTTCCCTACACGACGCTCTTCCGATCTNNNNTTGGTGTGACAGGGAGCAA   |
| HEK3_OT2_rev | TGGAGTTCAGACGTGTGCTCTTCCGATCTCTGAGATGTGGGCAGAAGGG         |
| HEK3_OT3_fwd | ACACTCTTCCCTACACGACGCTCTTCCGATCTNNNNTGAGAGGGAACAGAAGGGCT  |
| HEK3_OT3_rev | TGGAGTTCAGACGTGTGCTCTTCCGATCTGTCCAAAGGCCAAGAACCT          |
| HEK3_OT4_fwd | ACACTCTTCCCTACACGACGCTCTTCCGATCTNNNNTCCTAGCACTTTGGAAGGTCG |
| HEK3_OT4_rev | TGGAGTTCAGACGTGTGCTCTTCCGATCTGCTCATCTTAATCTGCTCAGCC       |

**Supplementary Note 1 - Analysis of editing quantification bias**

|                    |                                                                            |
|--------------------|----------------------------------------------------------------------------|
| UMI_HEK3_fwd       | ACACTCTTCCCTACACGACGCTCTTCCGATCTNNNNNNNNNNNNNNNATGTGGGCTGCCTAGAAAAGG       |
| UMI_CCR5-2_fwd     | ACACTCTTCCCTACACGACGCTCTTCCGATCTNNNNNNNNNNNNNNNAGAGGAGTCAGAGAGAATCCC       |
| UMI_AVA1678_fwd    | ACACTCTTCCCTACACGACGCTCTTCCGATCTNNNNNNNNNNNNNNAATCAATGTGAAGCAAATCGCAG<br>C |
| UMI_AVA1680_fwd    | ACACTCTTCCCTACACGACGCTCTTCCGATCTNNNNNNNNNNNNNNTCCTTCTACTGTCCCCTTCTGGG<br>C |
| UMI_AVA1682_fwd    | ACACTCTTCCCTACACGACGCTCTTCCGATCTNNNNNNNNNNNNNNAACATCGATAGGTACCTGGCTGT<br>C |
| 5p constant primer | ACACTCTTCCCTACACG                                                          |

### Supplementary Table 3. Sequences of primers and probes used for ddPCR assays

| Fig       | Assay                    | fwd                                             | rev                                      | Probe                                                                                     | Samples                              |
|-----------|--------------------------|-------------------------------------------------|------------------------------------------|-------------------------------------------------------------------------------------------|--------------------------------------|
| Fig 3d    | CCR5_B6                  | catctctgacctgttttcc                             | tctcgccttctc                             | /56-FAM/ACGACGGCG/ZEN/GTCTCAGTGGTG/3IABkFQ/                                               | 325/414                              |
|           | CCR5_B8_1                | gccaggacgggtcacctt<br>tg                        | tctcgccttctc                             | /56-FAM/ACGACGGCG/ZEN/GTCTCAGTGGTG/3IABkFQ/                                               | 507/584,<br>510/584,<br>532/584      |
|           | AAVS1_1077<br>AAVS1_3786 | ggaacggggctcagtct<br>ggcaagccttacatcgag<br>atcc | tctcgccttctc<br>gaggaggccctcatctg<br>gcg | /56-FAM/ACCACCGCG/ZEN/GTCTCCGTCGT/3IABkFQ/<br>/56-FAM/ACGACGGCG/ZEN/GTCTCAGTGGTG/3IABkFQ/ | 1077/1154<br>3786/3903,<br>3786/3930 |
|           | ACTB                     | acactgtgccatctac                                | aatgtcacgcacgatttc                       | /5HEX/CGGGACCTG/ZEN/ACTGACTACCTCAT/3IABkFQ/                                               | all                                  |
| Fig 3e    | CCR5_B8_2                | gccaggacgggtcacctt<br>tg                        | tctcgccttctc                             | /56-FAM/CTCAGTGGT/ZEN/GTACGGTACAAACCC/3IABkFQ/                                            | all                                  |
|           | ACTB                     | acactgtgccatctac                                | aatgtcacgcacgatttc                       | /5HEX/CGGGACCTG/ZEN/ACTGACTACCTCAT/3IABkFQ/                                               | all                                  |
| Fig 3g    | CCR5_B8_1                | gccaggacgggtcacctt<br>tg                        | tctcgccttctc                             | /56-FAM/ACGACGGCG/ZEN/GTCTCAGTGGTG/3IABkFQ/                                               | CCR5<br>samples                      |
|           | ALB                      | gtgactgtaattttttttg<br>cg                       | tctcgccttctc                             | /56-FAM/ACGACGGCG/ZEN/GTCTCAGTGGTG/3IABkFQ/                                               | ALB<br>samples                       |
|           | ACTB                     | acactgtgccatctac                                | aatgtcacgcacgatttc                       | /5HEX/CGGGACCTG/ZEN/ACTGACTACCTCAT/3IABkFQ/                                               | all                                  |
| ED Fig 6a | CCR5_B8_2                | gccaggacgggtcacctt<br>tg                        | tctcgccttctc                             | /56-FAM/CTCAGTGGT/ZEN/GTACGGTACAAACCC/3IABkFQ/                                            | all                                  |
|           | ACTB                     | acactgtgccatctac                                | aatgtcacgcacgatttc                       | /5HEX/CGGGACCTG/ZEN/ACTGACTACCTCAT/3IABkFQ/                                               | all                                  |
| ED Fig 6c | AAVS1_1077               | ggaacggggctcagtct                               | tctcgccttctc                             | /56-FAM/ACCACCGCG/ZEN/GTCTCCGTCGT/3IABkFQ/                                                | all                                  |
|           | CCR5_B8_1                | gccaggacgggtcacctt<br>tg                        | tctcgccttctc                             | /56-FAM/ACGACGGCG/ZEN/GTCTCAGTGGTG/3IABkFQ/                                               | attB                                 |
|           | CCR5_B8_2                | gccaggacgggtcacctt<br>tg                        | tctcgccttctc                             | /56-FAM/CTCAGTGGT/ZEN/GTACGGTACAAACCC/3IABkFQ/                                            | attB-GA                              |
|           | CCR5_B8_3                | gccaggacgggtcacctt<br>tg                        | tctcgccttctc                             | /56-FAM/ACCACCGCG/ZEN/GTCTCCGTCGT/3IABkFQ/                                                | attP                                 |
|           | CCR5_B8_4                | gccaggacgggtcacctt<br>tg                        | tctcgccttctc                             | /56-FAM/CTCCGTCGT/ZEN/CAGGATCATCCGT/3IABkFQ/                                              | attP-GA                              |
|           | ACTB                     | acactgtgccatctac                                | aatgtcacgcacgatttc                       | /5HEX/CGGGACCTG/ZEN/ACTGACTACCTCAT/3IABkFQ/                                               | all                                  |

## Supplementary Table 4. Sequence of recoded exonic *PAH* sequences

Nucleotides labeled in red indicate positions where silent mutations were introduced.

| Spacer 1 | Spacer 2 | Recoded allele product                                                                                                                                                                                                                                                                                      |
|----------|----------|-------------------------------------------------------------------------------------------------------------------------------------------------------------------------------------------------------------------------------------------------------------------------------------------------------------|
| 2.1      | 2.2      | GAAGACAAC <b>T</b> GCAATCA <b>G</b> AACGGCGCTATCTCTCTGATCTT <b>C</b> AGCCT <b>G</b> AAGGAAGAGGTGGGCGCCCTGGC<br>GAA <b>G</b> GTATTGCGCTTATTTGAG                                                                                                                                                              |
| 4.1      | 4.3      | TTCTCTGTGTTTCAGTGCC <b>G</b> TGGTT <b>T</b> CCACGGACAA <b>T</b> TCAGGAACTT <b>G</b> ATAGGTT <b>C</b> GTAA <b>T</b> CA <b>A</b> ATCT <b>T</b> GT<br>CCTACGGAGCC <b>G</b> AACT <b>T</b> GAC <b>G</b> CTGAT <b>C</b> ATCCTGTGAGTCCATGGCCCG                                                                     |
| 4.1      | 4.4      | TTCTCTGTGTTTCAGTGCC <b>G</b> TGGTT <b>T</b> CCACGGACAA <b>T</b> TCAGGAACTT <b>G</b> ATAGGTT <b>C</b> GTAA <b>T</b> CA <b>A</b> ATCT <b>T</b> GT<br>CCTACGGAGCC <b>G</b> AACT <b>T</b> GAC <b>G</b> CTGAT <b>C</b> ATCCTGTGAGTCCATGGCCCGTAG                                                                  |
| 4.2      | 4.3      | CCCAAGAACCATTCAAGA <b>A</b> CTT <b>G</b> ATAGGTT <b>C</b> GTAA <b>T</b> CA <b>A</b> ATCT <b>T</b> GT <b>C</b> TACGGAGCC <b>G</b> AACT <b>T</b> GAC <b>G</b> CTG<br>AT <b>C</b> ATCCTGTGAGTCCATGGCCCG                                                                                                        |
| 4.2      | 4.4      | CCCAAGAACCATTCAAGA <b>A</b> CTT <b>G</b> ATAGGTT <b>C</b> GTAA <b>T</b> CA <b>A</b> ATCT <b>T</b> GT <b>C</b> TACGGAGCC <b>G</b> AACT <b>T</b> GAC <b>G</b> CTG<br>AT <b>C</b> ATCCTGTGAGTCCATGGCCCGTAG                                                                                                     |
| 4.2      | 4.5      | CCCAAGAACCATTCAAGA <b>A</b> CTT <b>G</b> ATAGGTT <b>C</b> GTAA <b>T</b> CA <b>A</b> ATCT <b>T</b> GT <b>C</b> TACGGAGCC <b>G</b> AACT <b>T</b> GAC <b>G</b> CTG<br>AT <b>C</b> ATCCTGTGAGTCCATGGCCCGTAGGATGAGATT                                                                                            |
| 5.1      | 5.2      | CAGGTGCTCTTTTCTCTAGGG <b>C</b> TT <b>C</b> AA <b>G</b> AG <b>C</b> CCCGTTAT <b>C</b> GC <b>G</b> CCCG <b>C</b> CGTAAGCA <b>A</b> TT <b>C</b> GC <b>G</b> AT <b>A</b> TT<br>GCATATA <b>A</b> TTATCGCCAGTAAGTCTGCCTTGCTT                                                                                      |
| 7.1      | 7.5      | CTTTTCATCCCAGCTT <b>G</b> TACTGG <b>C</b> TT <b>T</b> CGACTCCG <b>C</b> CCCGTT <b>G</b> CCGG <b>G</b> CT <b>T</b> T <b>G</b> AG <b>C</b> AGTAGAGACT <b>T</b> TT <b>T</b> GG<br>GGGG <b>T</b> CTCGCCTTCCGAGTCTTCCACT                                                                                         |
| 7.1      | 7.6      | CTTTTCATCCCAGCTT <b>G</b> TACTGG <b>C</b> TT <b>T</b> CGACTCCG <b>C</b> CCCGTT <b>G</b> CCGG <b>G</b> CT <b>T</b> T <b>G</b> AG <b>C</b> AGTAGAGACT <b>T</b> TT <b>T</b> GG<br>GGGG <b>T</b> CTCGC <b>A</b> TTCCCG <b>G</b> T <b>T</b> TCATTGCACACAGTACATCAGAC                                              |
| 7.2      | 7.5      | TGGTTTCCGCCTCCGAC <b>C</b> GT <b>T</b> GCCGG <b>G</b> CT <b>T</b> T <b>G</b> AG <b>C</b> AGTAGAGACT <b>T</b> TT <b>T</b> GGGG <b>G</b> TCTCGC <b>A</b> TTCCG <b>C</b> GT<br>CTTCCACT                                                                                                                        |
| 7.2      | 7.6      | TGGTTTCCGCCTCCGAC <b>C</b> GT <b>T</b> GCCGG <b>G</b> CT <b>T</b> T <b>G</b> AG <b>C</b> AGTAGAGACT <b>T</b> TT <b>T</b> GGGG <b>G</b> TCTCGC <b>A</b> TTCCG <b>C</b> GT<br>G <b>T</b> TT <b>C</b> ATTGCACACAGTACATCAGAC                                                                                    |
| 7.2      | 7.7      | TGGTTTCCGCCTCCGAC <b>C</b> GT <b>T</b> GCCGG <b>G</b> CT <b>T</b> T <b>G</b> AG <b>C</b> AGTAGAGACT <b>T</b> TT <b>T</b> GGGG <b>G</b> TCTCGC <b>A</b> TTCCG <b>C</b> GT<br>G <b>T</b> TT <b>C</b> ATT <b>G</b> T <b>A</b> CC <b>C</b> AGT <b>A</b> TATTAGGCATGGTT <b>C</b> AAA <b>A</b> CCGATGTACACACCAGAA |
| 7.3      | 7.6      | GGCTGGCCTGCTTTCCT <b>G</b> TAGAGACT <b>T</b> TT <b>T</b> GGGG <b>G</b> TCTCGC <b>A</b> TTCCG <b>C</b> GT <b>G</b> TT <b>C</b> ATT <b>G</b> T <b>A</b> CC <b>C</b> AGT <b>A</b> TATT<br>CAGAC                                                                                                                |
| 7.3      | 7.7      | GGCTGGCCTGCTTTCCT <b>G</b> TAGAGACT <b>T</b> TT <b>T</b> GGGG <b>G</b> TCTCGC <b>A</b> TTCCG <b>C</b> GT <b>G</b> TT <b>C</b> ATT <b>G</b> T <b>A</b> CC <b>C</b> AGT <b>A</b> TATT<br>AGGCATGGTT <b>C</b> AAA <b>A</b> CCGATGTACACACCAGAA                                                                  |
| 7.3      | 7.8      | GGCTGGCCTGCTTTCCT <b>G</b> TAGAGACT <b>T</b> TT <b>T</b> GGGG <b>G</b> TCTCGC <b>A</b> TTCCG <b>C</b> GT <b>G</b> TT <b>C</b> ATT <b>G</b> T <b>A</b> CC <b>C</b> AGT <b>A</b> TATT<br>AGGCATGGTT <b>C</b> AAA <b>A</b> CCGATGTACACACCAGAACCGTGAAGTACTGTC                                                   |
| 9.1      | 9.2      | TTCCCCAATTACAGGAGAT <b>C</b> GGT <b>T</b> CGGA <b>A</b> GCCTGGGAGCACC <b>A</b> GAC <b>G</b> AGTATATAGAGAA <b>A</b> CTT <b>G</b> CTAC<br>AGTAAGTCCCTTCTCTCC                                                                                                                                                  |
| 9.1      | 9.3      | TTCCCCAATTACAGGAGAT <b>C</b> GGT <b>T</b> CGGA <b>A</b> GCCTGGGAGCACC <b>A</b> GAC <b>G</b> AGTATATAGAGAA <b>A</b> CTT <b>G</b> CTAC<br>AGTAAGTCCCTTCTCTCCCTGGGTGGATGGT                                                                                                                                     |
| 10.2     | 10.3     | CCAGATTTACTGGTTT <b>A</b> CC <b>G</b> T <b>C</b> GA <b>A</b> TT <b>C</b> GG <b>A</b> TT <b>G</b> T <b>G</b> TAA <b>G</b> CAGGGT <b>G</b> AT <b>A</b> GC <b>A</b> TTAA <b>G</b> CC <b>T</b> ACGG <b>A</b> GC <b>A</b><br>G <b>T</b> TT <b>G</b> CT <b>C</b> T <b>C</b> ATCCTTTGGTGAATTAC                     |
| 11.1     | 11.4     | GAAGCCAAAGCTTCTCC <b>A</b> CT <b>C</b> GA <b>A</b> CT <b>C</b> GAAAAGACT <b>G</b> CAAT <b>T</b> CAGAACTATAC <b>A</b> GT <b>G</b> ACAGAA <b>T</b> TT <b>C</b> AA <b>C</b><br>CA <b>T</b> T <b>G</b> TATTACGTGGCAGAGAGTT                                                                                      |
| 11.2     | 11.4     | AAAGCTTCTCCCTGG <b>A</b> CT <b>C</b> GAAAAGACT <b>G</b> CAAT <b>T</b> CAGAACTATAC <b>A</b> GT <b>G</b> ACAGAA <b>T</b> TT <b>C</b> AA <b>C</b> AT <b>T</b> GT<br>ATTACGTGGCAGAGAGTT                                                                                                                         |
| 12.2     | 12.4     | ACTTTGCTGCCACAATAC <b>A</b> AG <b>A</b> CC <b>A</b> TT <b>A</b> GC <b>T</b> GAGATAT <b>G</b> AT <b>C</b> CTTATAC <b>A</b> CAG <b>C</b> GC <b>A</b> TC <b>G</b> AA <b>G</b> T <b>G</b> CT <b>C</b><br>G <b>A</b> T <b>A</b> CA <b>C</b> T <b>C</b> A <b>C</b> AGCTTAAGATTTGGCTG                              |
| 12.3     | 12.5     | GCTACGACCCATACAC <b>C</b> AG <b>C</b> AT <b>C</b> G <b>A</b> AG <b>T</b> G <b>C</b> T <b>C</b> G <b>A</b> T <b>A</b> CA <b>C</b> T <b>C</b> A <b>C</b> A <b>T</b> T <b>G</b> AAGAT <b>C</b> CT <b>C</b> G <b>A</b> G <b>A</b> C <b>A</b> G <b>T</b><br>AT <b>C</b> AACAGTAAGTAATTTACAC                      |

**Supplementary Table 5.** TwinPE-mediated off-target genome editing.

**twinPE-mediated % editing at *HEK3* on-target site and off-target sites**

| <i>HEK3</i>       | Untreated | standerd pegRNAs     |                      |                      |                      | enhanced pegRNAs     |                      |                      |                      |
|-------------------|-----------|----------------------|----------------------|----------------------|----------------------|----------------------|----------------------|----------------------|----------------------|
|                   |           | SA ( $\Delta 77$ nt) | SA ( $\Delta 56$ nt) | HA ( $\Delta 64$ nt) | PD ( $\Delta 90$ nt) | SA ( $\Delta 77$ nt) | SA ( $\Delta 56$ nt) | HA ( $\Delta 64$ nt) | PD ( $\Delta 90$ nt) |
| on-target site    | <0.1      | 14.8                 | 18.8                 | 11.7                 | 40.4                 | 29.6                 | 28.5                 | 29.5                 | 59.5                 |
| off-target site 1 | <0.1      | <0.1                 | <0.1                 | <0.1                 | <0.1                 | <0.1                 | <0.1                 | <0.1                 | <0.1                 |
| off-target site 2 | <0.1      | <0.1                 | <0.1                 | <0.1                 | <0.1                 | <0.1                 | <0.1                 | <0.1                 | <0.1                 |
| off-target site 3 | <0.1      | <0.1                 | <0.1                 | <0.1                 | <0.1                 | <0.1                 | <0.1                 | <0.1                 | <0.1                 |
| off-target site 4 | <0.1      | <0.1                 | <0.1                 | <0.1                 | <0.1                 | <0.1                 | <0.1                 | <0.1                 | <0.1                 |

## Supplementary Note 1. Analysis of editing quantification

To assess quantification bias, we applied unique molecular identifiers (UMIs) to index individual allele copies using linear amplification followed by bead-based purification, PCR amplification, and Illumina MiSeq amplicon sequencing (see method section for details) similar to the method used by Choi, et al<sup>1</sup> and Bolukbasi, et al<sup>2</sup>. Reads containing identical UMIs are first aligned and then collapsed (deduplicated) to a single consensus sequence. This workflow allows for quantification of allele frequencies based on UMI counts instead of total read counts, which may be subject to PCR amplification bias based on sequence composition or amplicon size differences between different allele products.

To ensure the UMI-sequencing protocol can faithfully quantify the editing efficiency, we mixed chemically synthesized gene fragments (IDT) replicating either an edited or wild-type allele for the given edits (insertion of *attB* at *CCR5* or 77-nt deletion at *HEK3*) to simulate 0%, 20%, 40%, 60%, 80%, and 100% editing efficiencies before diluting the mixed standards to 2000 genetic copies/ $\mu$ L, which is the estimated allele copy number amplified from our cell editing experiments. Diluted standards were then subjected to UMI barcoding, MiSeq analysis, and deduplication. We plotted the percentage of observed edited alleles from three independent biological replicates after sequencing and UMI deduplication against the expected edited allele percentage based on the input allele fraction.

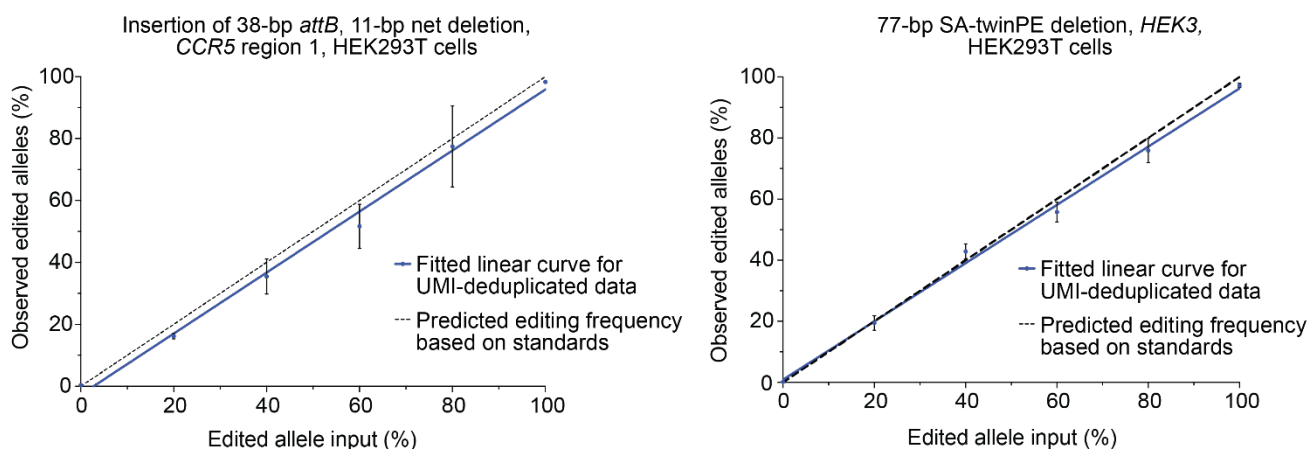

Next, we prepared libraries of twinPE-edited samples from *CCR5* region 1 (15 samples), *CCR5* region 2 (7 samples), *HEK3* (4 samples), and *IDS* (1 sample). By comparing the editing efficiency calculated from total reads and the editing efficiency calculated from reads deduplicated based on UMIs, we estimated the bias in editing efficiency quantification

using the linear amplification with UMIs as the “true” editing efficiency. When plotting quantification bias vs. absolute size difference between the starting and edited alleles (net deletion size), we observed a positive correlation between bias and twinPE-induced deletion size. Although bias in this workflow could still exist at the linear amplification stage due to differences in sequence composition at the target DNA locus, this bias does not propagate over the course of repeated PCR cycles and should therefore more accurately represent the true editing efficiency in twinPE editing experiments analyzed by amplicon sequencing.

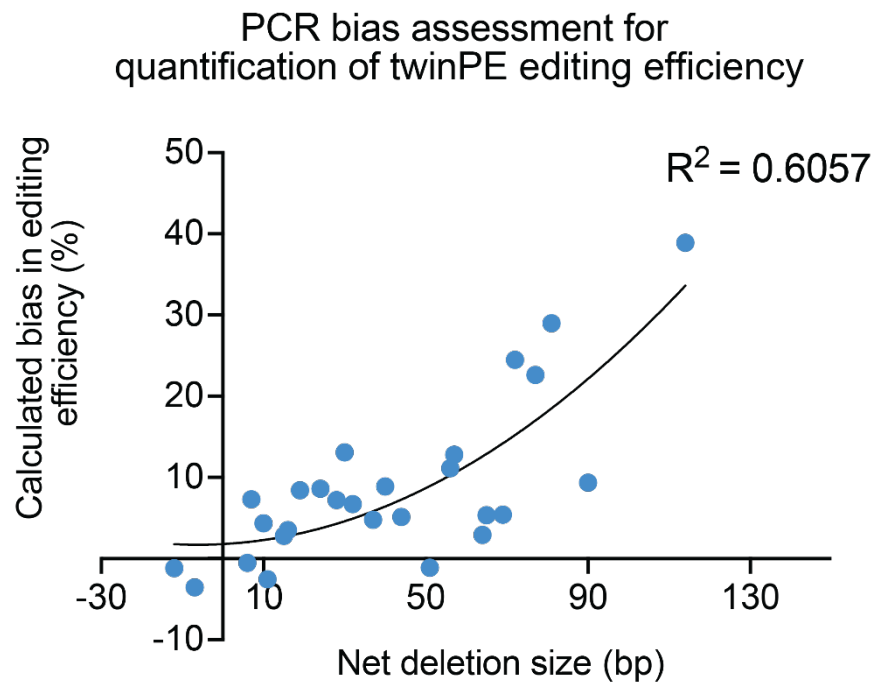

Each point in the above graph represents the mean value of bias calculated from three independent biological replicates. The percentage of bias in editing efficiency was defined by the following equation:  $100 \times (A - B) \div B$ , where “A” represents the editing efficiency calculated from total read counts without UMI-based deduplication, and “B” represents the editing efficiency calculated after UMI-based deduplication. For example, if the non-deduplicated editing efficiency is 60% and the deduplicated editing efficiency is 46%, the calculated bias is 30%, i.e., the deduplicated editing efficiency is 1.3-fold lower than the non-deduplicated editing efficiency. The bias in editing efficiency is plotted above as a function of the net deletion between the starting and edited alleles, which shows a positive correlation (a second-order polynomial trend line,  $R^2 = 0.6057$ ).

## Supplementary Note 2. Representative plot of FACS gating for GFP reporter assay

25,000 HEK293T stable GFP reporter cells were seeded into 48-well poly-D-lysine coated plates (Corning). 16-24 h post-seeding, cells were transfected with 1uL of Lipofectamine 2000 (Thermo Fisher Scientific) using the protocol described in the methods section and 750 ng of PE2, 250 ng AAVS1 targeting pegRNAs (62.5 ng each), and Bxb1 plasmid DNA (100 ng, 200 ng, 500 ng, or 1000 ng). The untreated and twinPE+Bxb1 treated cells were cultured for 72 hours, and then collected for flow cytometry analysis. HEK293T stable GFP reporter cells were first gated (Gate A) based on forward (FSC-A) and side scattering (SSC-A) to remove dead cells and other debris. A second gate (Gate B) was used to select singlets based on FSC-H and FSC-A. Finally, GFP positive and GFP negative cells were gated (Gate C) and analyzed via FITC channel.

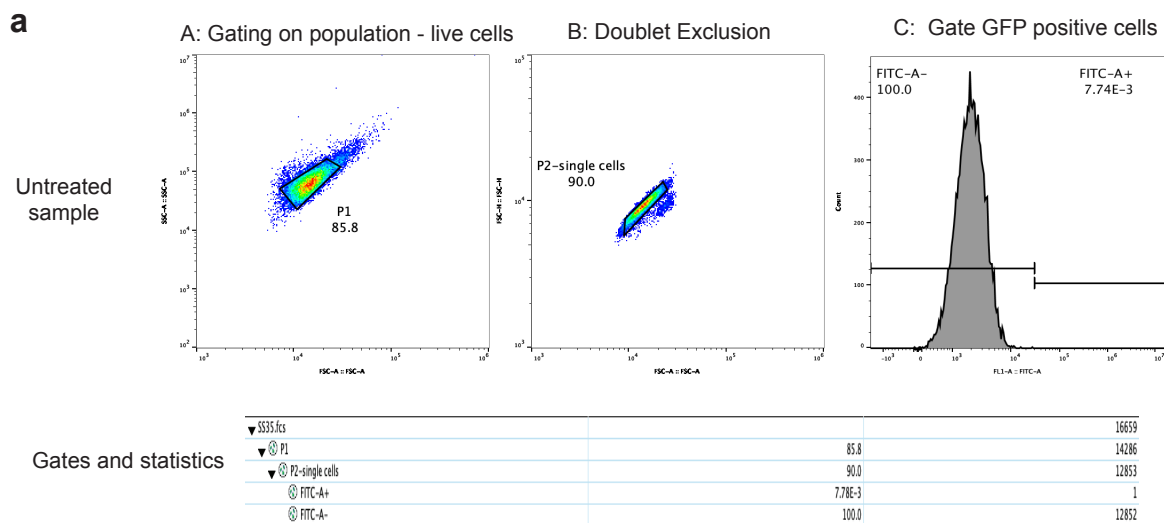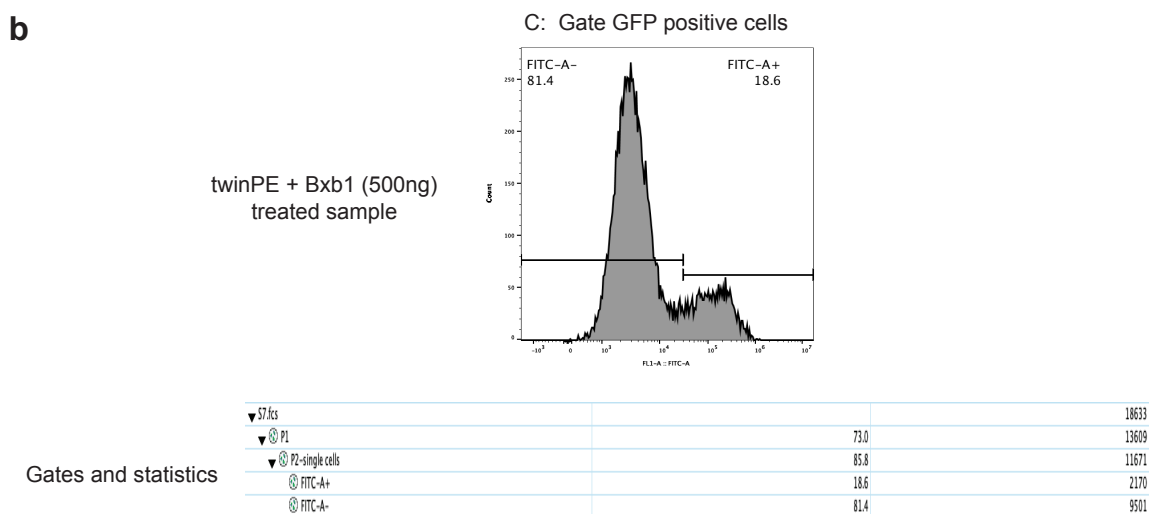



### Supplementary Note 3. Analysis of twinPE design principles

To identify design principles that lead to efficient twinPE editing, we analyzed our dataset of *attP* insertions at *AAVS1* and *attB* insertions at *CCR5*. For each spacer pair, we calculated nick-to-nick distances between predicted pegRNA-induced nick sites, the DeepCas9 score<sup>3</sup> for each spacer, and the predicted  $T_m$  of the pegRNA primer binding sequence (PBS) for *AAVS1*. For comparing nick-to-nick distances and DeepCas9 scores, the highest efficiency pegRNA pair for each spacer pair was chosen for analysis (*i.e.*, the optimal individual pegRNAs were used). For analyzing the influence of predicted spacer activities, the average of the individual DeepCas9 scores for each spacer was used. For comparing predicted  $T_m$  values for PBS variants, the editing efficiency of each pegRNA was normalized to the maximum editing achieved within the spacer pair group. The editing efficiency for a given PBS variant was then averaged across the three paired pegRNA editing efficiencies (each experiment with the paired spacer).  $T_m$  was calculated according to the following formula<sup>4</sup>:  $T_m = 4N_{G-C} + 2N_{A-T}$ .

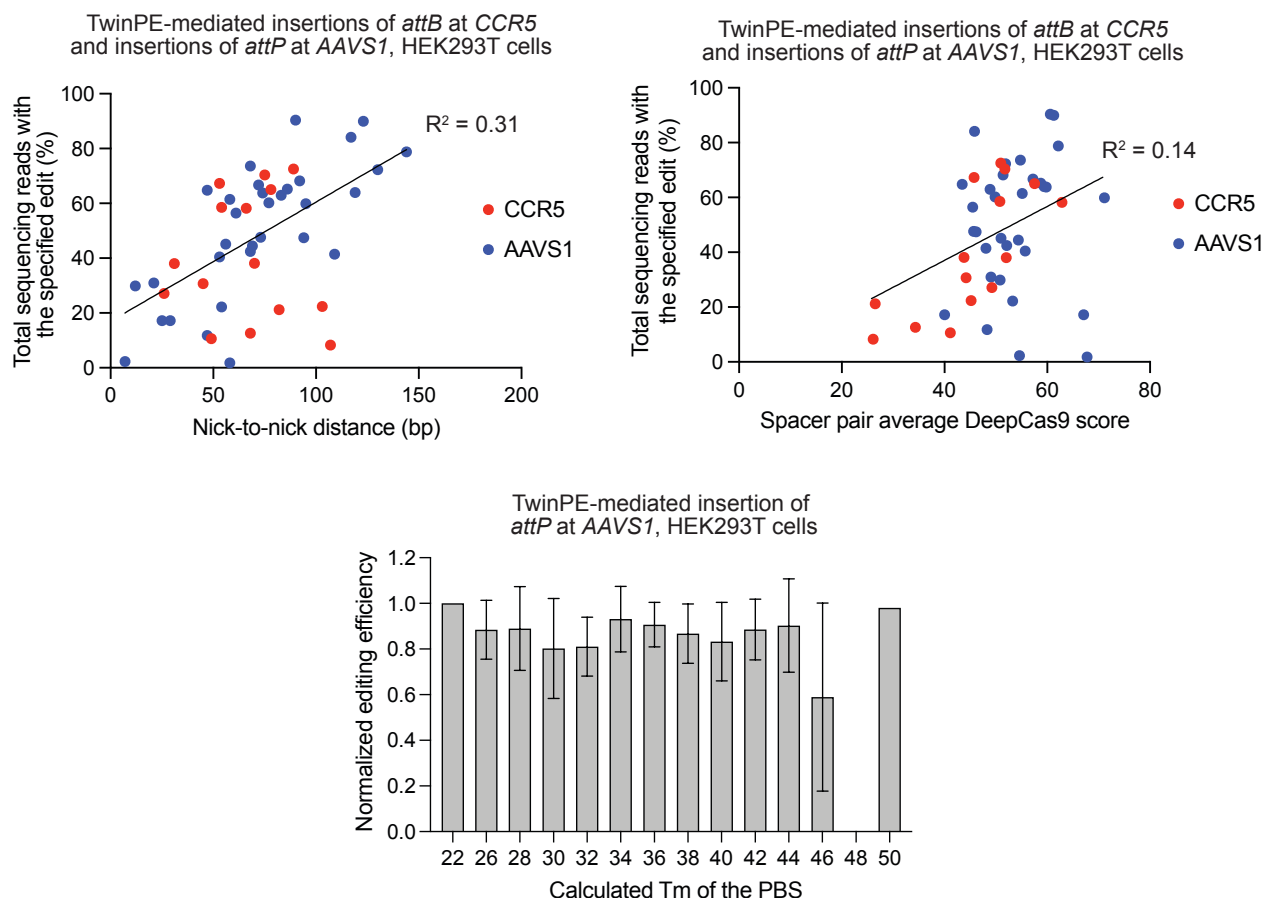

Although efficient targeting of both DNA protospacers is likely necessary for achieving efficient twinPE, we observed only weak correlations between *in silico* predictions of Cas9 spacer activity and observed twinPE editing efficiencies (top right panel). This poor correlation could arise from other determinants of twinPE efficiency beyond the protospacer, including RT template and PBS choice. While PBS optimization was important for high editing efficiency at many sites, we did not observe an optimal PBS melting temperature across the pegRNA designs in this study (bottom panel). A correlation between prime editing efficiency and the distance between pegRNA-induced nicks was observed (top left panel), which may suggest an optimal spacing of 50 to 100 bp, although many exceptions exist.

#### **Supplementary Note 4. Discussion of other targeted integration methods**

TwinPE and Bxb1-mediated recombination offer advantages over other approaches. The serine integrase phiC31<sup>5</sup> and fusions of zinc fingers, TALEs, or dCas9 to the catalytic domain of Gin recombinase<sup>6-9</sup> have been used to integrate or excise DNA at endogenous pseudo-sites in the human genome, but the efficiency of these sequence manipulations has generally been low and, more importantly, the extensive sequence preferences inherent to these recombinases limit the number of targetable loci to a minute fraction of pseudo-sites in the genome. The programmable integration of attachment sites by twinPE overcomes this challenge by enabling insertion of cognate recombinase recognition sequences at any PE-targetable locus.

Compared to nuclease-based methods, the twinPE and recombinase approach avoids the generation of DSBs, which typically lead to uncontrolled mixtures of by products<sup>10</sup>, and can also lead to chromosomal rearrangements<sup>11</sup>, chromothripsis<sup>12</sup>, large deletions<sup>13-15</sup>, and p53 activation<sup>16-18</sup>. Integration orientation using twinPE and Bxb1 recombinase is strictly controlled by the directionality of the *attB* and *attP* sequences<sup>19</sup>, in contrast to uncontrolled integration orientation using homology-independent repair<sup>20</sup>. Methods that use HDR also enable control of sequence orientation, and can achieve efficiencies on the order of 5-10% without drug selection or suppression of NHEJ<sup>21-23</sup>, but HDR is less efficient than NHEJ in most cell types and typically requires DSBs<sup>24,25</sup>. Methods have also been developed for making targeted gene-sized insertions through paired nicking of the genome and a donor cassette<sup>26,27</sup>. These approaches do not require double strand breaks, but remain reliant on HDR and supportive cell types<sup>27</sup>.

**Supplementary Sequences 1.** Sequences of plasmid donor DNA sequences harboring Bxb1 recombination sites

*att* site: highlighted in yellow  
Promoter-less EGFP: highlighted in green  
EF1a promoter: underlined  
PuroR: highlighted in red  
BFP: highlighted in blue  
KanR: highlighted in grey

***attB*-Puro-GA donor DNA:**

gatgccagctcattctcccactcatgatctatagatccccgggctgcaggaattctaccactctgtcgataccaccagagacc  
ccattggggccaatacgcgccggttcttcttccccaccccccaagttcggtgaaggccagggtcgcagccaacg  
tcggggcggcaagcttacatcgagatcccggcttgcgacgacggcgactccgctcgcaggatcatccgtgagcaagggcga  
ggagctgtcaccgggtggtgccatcctggtcagctggacggcgacgtaaaggccacaagttcagcgtgtccggcgagg  
gcgagggcgaatgccacctacggcaagctgacctgaagttcatctgcaccaccggcaagctgcccgtgccctggcccaccct  
gtgaccacctgacctacggcgtgcagtgctcagccgtacccccaccacatgaagcagcagacttctcaagtcgccaatgc  
ccgaaggctacgtccaggagcgcaccatcttctcaaggacgacggcaactacaagaccgcgcgagggtgaagttcgaggg  
cgacaccctggtgaaccgcatcgagctgaagggcatcgactcaaggaggacggcaacatcctggggcacaagctggagtac  
aactacaacagccacaacgtctatatcatggccgacaagcagaagaacggcatcaagggaactcaagatccgccacaaca  
tcgaggacggcagcgtgcagctcgcgaccactaccagcagaacacccccatcggcgacggccccgtgctgtgcccgaca  
accactactgagcaccagtcgcctgagcaagacccaacgagaagcgcgatcacatggtcctgctggagttcgtgacc  
gcccgggatcactctcggcatggacgagctgtacaagagcggcctgaggagcagagcccaggcgagcaacagcgcctg  
ggacgccaccatgggcgatcggcgggaattgactagtgcggcgcctaggatccatgccgatagcgttggtgagtggataac  
cgtattaccgccaagcttatgatgtgccctcagtgggcagagcgcacatcggccacagtccccgagaagttgggggaggg  
gtcggcaattgaaccggtgcctagagaaggtggcgcggggtaaactggaaagtgatgctgctactggctccgccttttccgga  
gggtgggggagaaccgtatataagtgcagtagtcgcccgtgaacgttcttttcgcaacgggttgccgccagaacacaggtaaqt  
ccgtgtgtggttcccgcggcctggcctctttacgggttatggcccttgcgtgcttgaattactccacctgctcagctacgtgattctt  
gatcccagcttcgggttggaagtgggtgggagagttcgaggccttgcgcttaaggagccccttcgctcgtgcttgagtgaaggcc  
tggcctgggcgctggggccgcccgcgtgcgaatctggtggcaccttcgcccctgtctcgtgctttcgataagtctctagccatttaa  
atcttctgatgacctgctgcgacgctttttctggcaagatagcttgttaaatacggggccaagatctgcacactggtatttcggttttggg  
ccgcgggcggcgcaggggcccgtgcgtcccagcgcacatgttcggcgagcgcggggcctgcgagcgcggccaccgagaatc  
ggacggggtagtctcaagctggccggcctgctctggtgcttggcctcgcgcggcggctgtatcggccccgcccgtgggcggcaagg  
ctgcccggctcggcaccagttgctgagcggaaagatggccgcttcccggcctgctgcaggagctcaaatggaggacgc  
ggcgtcgggagagcggcggggtgagtcacccacacaaaggaaaagggccttccgtcctcagccgtcgttcatgtactcca  
cggagtaccgggcggcctccaggcacctcgattagttctcgcgctttggagtacgtcgtctttaggttggggggaggggtttatgc  
gatggagtttcccacactgagtggtggagactgaagttaggccagcttggcactgatgtaattccttggaaattgcccttttga  
gtttggatcttggctcatttcaagcctcagacagtgttcaaaagtttttcttccattcaggtgctgtagctagcccaccatgaccga  
gtacaagcccacggtgcccctcgccacccgcgacgacgtccccgggctacgcaccctcgcggccggcttcgcccgactacc  
ccgccacgcgccacaccgtcgaccggaccgccacatcgagcgggtcaccgagctgcaagaactcttctcagcgcgctcgg  
gctcgacatcggcaaggtggtggtcgcggacgacggcggcgggtggcggctcggaccacggcggagagcgtcgaagcggg  
ggcgggtgtcggcagatcggcccgcgatggccgagttgagcgggtcccggctggccgcgagcaacagatggaaggcctcc  
tggcggcaccggccaaggagcccgcgtggttcttggccaccgtcggcgtctcggcccaccaccagggcaagggctcggg  
cagcggctcgtgtccccggagtggaggcggcggagcgcgggggtgccgccttctggagacctccgcgccccgcaac  
ctccccctacgagcggctcggcttaccgtcaccgcccagctcagaggtgccgaaggaccgcacctggtgatgaccgc  
aagcccgggtcgggatcgggagagggcagaggaagtctgctaacatgcggtgacgtcgaggagaatcctggcccaccggctc  
ccaccagcagctgattaaggagaacatgcacatgaagctgtacatggaggccaccgtggacaaccatcacttcaagtgcaca  
tcgaggggcgaaggcaagccctacgagggcaccagaccatgagaatcaaggtggtcagggcggccctctccccttgcctt  
cgacatcctggctactagcttctctacggcagcaagaccttcatcaaccacaccagggtatccccgacttctcaagcagctt

ccctgagggcttcacatgggagagagtcaccacatacgaagacgggggctgctgaccgctaccaggacaccagcctccag  
gacggctgcctcatctacaacgtcaagatcagagggggaacttcacatccaacggccctgtgatgcagaagaaaacactcgg  
ctgggagggccttcaccgagacgctgtaccccgctgacggcgccctggaaggcagaaacgacatggccctgaagctcgtggg  
gggagccatctgatcgaacaatcaagaccacatagatccaagaaaccgctaagaacctcaagatgctggcgctactat  
gtggactacagactggaaagaatcaaggaggccaacaacgagacctacgtcgagcagcagaggtggcagtgccagata  
ctgcgacctccctagcaaacctggggcacaagcttaataagaattctctagaggatccagacatgataagatacattgatgattg  
gacaaaccacaactagaatgcagtgaaaaaatgctttattgtgaaattgtgatgctattgctttattgtaaccattataagctgca  
ataaacaagttaacaacaacaattgcattcattttatgtttcaggttcagggggagggtgagggttttttaagcaagtaaacctc  
tacaatgtggatggctgattgatcctgcaagcctcgtcggcggtttattctgttgacaattaatcatcggcatagtatatcggc  
atagtataatacgaacaaggtgaggaactaaacctatgggatcggccattgaacaagatggattgcacgcaggttctccggccgctt  
gggtggagaggctattcggctatgactgggcacaacagacgatcggctgctctgatgccgccgtgtccggctgtcagcgcagg  
gcccgggttcttttgaagaccgacctgtccgggtccctgaatgaactgcaggacgaggcagcgcggctatcgtgctggcca  
cgacgggcttcttgcgcagctgtctgcagctgtcactgaagcgggaaggactggctgctattgggcaagtgccggggca  
ggatctctgtcatctcacctgtcctgcccagaaagatccatcatggctgatcaatgcggcggtgcatacgttgatccggct  
acctgccattcgaccaccaagcgaacaatcgcatcgagcagcagctactcggatggaagccggcttctcgtatcaggatgat  
ctggacgaagagcatcagggctcgcgcccagccgaactgtcggcaggctcaaggcgcgatgccgacggcgaggatctc  
tcgtgacctatggcgatgctgttccgaatatcatggtggaaaatggccgctttctggattcatcactgtggccggctgggtgtg  
gcccagcgtatcaggacatagcgttggctacccgtgatattgctgaagagcttggcgcgatgggctgaccgcttctcgtgctt  
tacggtatcggcggcccgattcgcagcgcacgcttctatcgccttctgacgagttctctgagcgggactctggggtcgaataa  
agaccgaccaagcgacgtctgagagctccctggcgaattcggtaaccaataaaagagcttttttcatgatctgtgtgttggttttg  
ccgcttctgctggcgttttccataggctccgccccctgacgagcatcaaaaaatcgacgctcaagtcagaggtggcgaaaccc  
gacaggactataaagataaccagggtttccccctggaagctccctcgtgctctcctgttccgacctgcccgttaccggatacct  
gtccgctttctccctcgggaagcgtggcgcttctcatagctcacgctgtaggtatctcagttcgggtgtaggtcgttcccaagctg  
ggctgtgtgcagaaacccccgttcagcccagcgtgcgcttaccggtaactatcgtcttgagtccaacccggtaagacacga  
cttatcgccactggcagcagccactggtaacaggattagcagagcaggtatgtaggcgggtctacagagttctgaagtggtg  
cctaactacggctacactagaagaacagatattggatctcgcgctctcgtgaagccagttacctcggaaaaagagttgtagctctt  
gatccggaacaacaccagcgtggttagcgggtggtttttgttgaagcagcagattacgcgcagaaaaaaaggatctcaaga  
agatcctttgatctttctagtgtcg

**attB-Puro donor DNA:**

gatgccagctcattctcccactcatgatctatagatccccgggctgcaggaattctaccactctgtcgataccccaccgagacc  
ccattggggccaatacgcggcgcttcttctttcccaccccccaagttcgggtgaaggcccagggtcgcagccaacg  
tcggggcggaagcttaccatcgagatcccggctgtcgcagcagggcggtctccgtcgtcaggatcatccgtgagcaagggcgag  
gagctgttcaccgggggtggtgccatcctggtcagctggacggcgacgtaaacggccacaagttcagcgtgtccggcgagg  
cgagggcgatgccacctacggcaagctgacctgaagttcatctgcaccaccggcaagctgcccgtgccctggcccacctcgt  
gaccacctgacctacggcgtgcagtgctcagccgctaccccaccacatgaagcagcagcacttctcaagtcgccatgcc  
cgaaggctacgtccaggagcgcaccatcttctcaaggacgacggcaactacaagaccgcgcccagggtgaagttcagggg  
gacacctggtgaaccgcatcgagctgaaggcatcgacttcaaggaggacggcaacatcctggggcacaagctggagtaca  
actacaacagccacaacgtctatcatggccgacaagcagaagaacggcatcaagggtgaactcaagatccgccacaacat  
cgaggacggcagcgtgcagctcggcaccactaccagcagaacacccccatcggcgacggccccgtgctgctgcccgacaa  
ccactacctgagcaccagtcggcctgagcaaaagaccccaacgagaagcgcgatcatalggtcctgctggagttcgtgacc  
ccgcccgggatcactctcggcatggacgagctgtacaagagcggcctgaggagcagagcccaggcgagcaacagcggcgtg  
gacgccaccatgggcatcggcgggaattgactagtgcggccgctaggatccatgccgatagcgttgggtgagtgataacc  
gtattaccgccaagcttatgcatgtcccgtcagtgggcagagcgcacatcggccacagtcccggagaagttgggggaggggt  
cggcaattgaaccggtccttagagaaggtggcgggggtaaacctgggaaagtgtctgtactgctccgcttttcccag  
ggtgggggagaaccgtatataagtgcagtagtcggctgaacgttcttttcgcaacgggttgcggccagaacacaggtlaagt  
cgtgtgtgttcccggggcctggcctttacgggttatggccttgcgtgcttgaattacttccacctggtcagctacgtgattctg  
atcccagcttccgggttgaagtggtgagaggttcgagccttgcgcttaaggagccccctcgcctcgtgcttgaagtgaggcct  
ggcctggcgctggggccgcccgtgcgaatctggtggcacctcgcgctgctcgtgcttctgataagttcttagccatttaaaa

ttttgatgacctgctgacgcttttttctggcaagatagtctttaaatacgggccaagatctgcacactggtatttcggttttggggc  
cgccggcgacggggcccgctgctcccagcgcacatgttcggcgagcggggctgagcgccaccgagaatcg  
gacggggtagtctcaagctgcccggcctgctctggtgcttggcctcgccgcccgtgatacggcccctgggcggaaggct  
ggcccgtcggcaccagttgctgagcggaaagatggccgctcccggcccctgctgacgggagctcaaatggaggacggc  
cgctcgggagagcgggcggtgagtcacccacacaaaggaaaaggccttccgtcctcagccgctgcttcatgtgactccacg  
gagtaccggcgccgtccaaggcacctcgattagttctcgccgtttggagtacgctgctttaggtggggggaggggtttatgcat  
ggagtcccacactgagtggtgagactgaagtaggcccagctggcactgatgtaattccttggaaattgcccctttttagttt  
ggatcttggttcaattctcaagcctcagacagtggttcaaaqtttttctccatttcagggtcgtgagctagcccaccatgaccgagta  
caagcccacgggtgcccctcgccacccgagcagcagctccccggggcgttacgcacccctgcccggcggttcgcccgactacccc  
gccacgcgccacaccgctgacccggaccgcccacatcgagcgggtaccgagctgcaagaactctcctcacgcgcgtcgggc  
tcgacatcggcaagggtggtgctcggacgagcggcgccggtggcggctgaccacgcccggagagcgtcgaagcggggg  
cgggttcgcccagatcggcccgcgatggccgagttgagcggttcccggctggccgcgagcaacagatggaaggcctcctg  
gcccgcaccggccaaggagcccgcgtggtcctggccaccgctggcgtctgcccgaccaccagggaagggtctgggca  
gcccgtgctgctcccggagtgaggcggcggagcgcgcccgggtgcccgcttctggagacctccgcccgcacccca  
cccttctacgagcggctcggctcaccgctaccgcccagcgtcaggtgcccgaaggaccgcccacctggtgatgacccgca  
gcccgtgcccggatcgggagagggcagaggaagtctgtaacatgcccgtgacgtcagggagaatcctggcccaccggtcggc  
accagcagctgattaaggagaacatgcacatgaagctgacatggaggccaccgtggacaaccatcactcaagtgcacatc  
cgagggcgaaggcaagccctacgagggcaccagaccatgagaatcaagggtggtagggcgccctctccccttgccttc  
gacatcctggctactagcttctctacggcagcaagacctcatcaaccacaccagggcatccccgacttctcaagcagctctc  
cctgagggcttccatgggagagagtcaccacatacgaagacggggcggtgctgaccgctaccaggacaccagcctccagg  
acggctgctcctacatcaacgtcaagatcagaggggtgaacttcacatccaacggcccctgtgatgcagaagaaaacactcggct  
gggaggccttaccgagacgctglaccccgtgacggcggcctggaaggcagaaacgacatggccctgaagcctggtggg  
ggagccatctgatcgaacatcaagaccacatagatccaagaacccgctaagaacctcaagatgcttggcgtctactatg  
tggactacagactggaaagaatcaaggaggccaacaacgagacctacgtcagcagcagcagagggtggcagtgccagatact  
gagacctccctagcaaacctggggcacaagcttaattaagaattctctagaggatccagacatgataagatacattgatgagttgg  
acaaaccacaactagaatgcagtgaaaaaatgctttatttgtaaatttgatgctattgctttattgtaaccattataagctgcaat  
aaacaagttaacaacaacaattgcattcattttatgtttcagggtcagggggaggtggtggagggttttaagcaagtaaacctcta  
caaatggtgatggctgattatgatcctgcaagcctcgtcggcggtttattctgttgacaattaatcatcggcatagtatcggcat  
agtataatacgaagtgaggaaactaaaccatgggatcggccattgaacaagatggattgcacgcaggttctccggccgctg  
ggtggagaggctattcggctatgactgggcacaacagacgatcggctgctctgatgccgcccgttccggctgtcagcgcagggg  
cgcccgttcttttgcagaccgacctgcccgtgcccgaatgaactgcaggacgaggcagcgcggctatcgtggctggccac  
gacgggcttccctgagcagctgtgctcagcgttgcactgaagcgggaagggactggctgctattggcggaagtccggggca  
ggatcctctgcatctcacctgctcctgcccagaaagatccatcatggctgatgcaatgcggcggctgcatacgttgatccggct  
acctgccattcgaccaccaagcgaacatcgatcgagcagcagctactcggatggaagccggtcttgcgatcaggatgat  
ctggacgaagagcatcaggggctcgcgcccagccgaactgtcggcaggctcaaggcgcgatcccagcggcagggatctcg  
tcgtgacctatggcgatgctgctgcccgaatatcatggtggaatggccgctttctggattcatcactgtggccggctgggtg  
gcccaccgctatcaggacatagcgttggctaccgctgatattgctgaagagcttggcggcgaatgggctgaccgcttctcgtgctt  
tacggtatcggcccccgattcgcagcgcacatcgcttctatcgccctctgacgagttctctgagcgggactctggggtcgaataa  
agaccgaccaagcagcgtctgagagctcccctggcgaattcggtaaccaataaaagagcttttttcatgatctgtgtgttttgg  
ccgcttctgctggcgttttccataggctccgccccctgacgagcatcacaataaaagagcttcaagctcagaggtggcgaaaccc  
gacaggactataaagataaccaggcgttcccctggaagctcccctgctgctctcctgttccgacctgcccgttaccggatacct  
gtcccctttctcccctcgggaagcgtggcgcttctcatagctcacgctgtaggtatctcagttcgggtgtaggtcgttcccaagctg  
ggctgtgacgaacccccgtcagcccagcgtgcccctatccggtaactatcgtcttgagtccaacccgtaagacacga  
cttatcggcactggcagcagccactggtaacaggattagcagagcaggtatgtagggctgtacagagttctgaagtggtg  
cctaactacggctacactagaagaacagtatttggatctcgcgtctgctgaagccagttacctcggaaaaagagttgtagctctt  
gatccggcaaacacaccaccgctggttagcgggtggtttttgtttgcaagcagcagattacgcgcagaaaaaaggatctcaaga  
agatcctttgatctttctagtgtcg

**attP-Puro-GA donor DNA:**

gatgccagctattcctcccactcatgatctatagatccccgggctgcaggaattctaccactctgtcgataccccaccgagacc  
ccattggggccaatacgcgccgcttcttcttccccaccccccccccaagttcgggtgaaggcccagggtcgcagccaacg  
tcggggcggcaagcttacctcgagatcccggttgtctggtcaaccaccgaggactcagtggtgtacggtacaaacccccgtgagc  
aagggcgaggagctgtcaccgggggtggtgccatcctggtcgagctggacggcgacgtaaacggccacaagttcagcgtgtc  
cggcgagggcgagggcgatgccacctacggcaagctgacctgaagttcatctgcaccaccggcaagctgcccgccctgg  
cccaccctcgtgaccaccctgacctacggcgtgcagtgctttagccgctacccccaccacatgaagcagcagcacttctcaagt  
ccgccaatgccgaaggctacgtccaggagcgcaccatcttctcaaggacgacggcaactacaagaccggcgccgaggtgaa  
gttcgagggcgacaccctggtgaaccgcatcgagctgaagggcatcgactcaaggaggacggcaacatcctggggcacaag  
ctggagtacaactacaacagccacaacgtctatcatggccgacaagcagaagaacggcatcaaggtgaactcaagatccg  
ccacaacatcgaggacggcagcgtgcagctgccgaccactaccagcagaacacccccatcggcgacggccccgtgctgct  
gccccgacaaccactacctgagcaccagctccgccccgagcaaaagaccccaacgagaagcgcgatcacatggtctctggtgag  
ttcgtgaccgcccgggatcactctcggcatggacgagctgtacaagagcggcctgaggagcagagcccaggcgagcaac  
agcgcctgtgacgccaccatgggctgcgccgggaattgactagtgccggccgctaggatccatgccgatagcgttggtgag  
tgataaccgtattaccgccaagcttatgcatgtgcccgctcagtgggcagagcgcacatcggccacagctccccgagaagttggg  
gggaggggctcggcaattgaaccggtcctagagaaggtggcgccgggtaaactgggaaagtgtatgctgtactggctccgct  
tttccccgaggggtgggggagaaccgtatataagtgcagtagtcgccgtgaacgttcttttcgcaacgggttgccgccagaacaca  
ggtaagtccgtgtgtggtccccgcccctggccttttacgggttatggccctgcgtgcctgaattactccacctggctgcagta  
cgtgattctgatcccagcttccgggtggaagtgggtgggagagttcagggccttgcgcttaaggagccccttgcctcgtgctga  
gttgaggcctggcctgggcccgtggggcccgcgtgcgaatctggtggcaccttgcgcctgtctcgtgctttcgataagtctctag  
ccattaaaattttgatgacctgctgcgacgctttttctggcaagatagctctgtaaattcggggccaagatctgcacactggtattcg  
gttttggggccgcccggcgacggggcccgtgcgtcccagcgcacatgttcggcgaggcggggcctgcgagcgcggccac  
cgagaatcggacggggtagtctcaagctggccggcctgctggtgctgctgcccgcggccgtgtatcccccgccctgggc  
ggcaaggctggcccgtcggcaccagttcgtgagcggaaagatggccgcttcccggccctgctgcagggagctcaaaatgg  
aggacgcggcgtcgggagagcgggcccgtgagtcaccacacaaaaggaaaaggccttccgtcctcagccgtcgttcat  
gtgactccacggagtaccgggcccgtccaggcacctcgattagttctcgcgcttttggagtacgtcgtctttaggttgggggagg  
ggtttatgcatggagttccccacactgagtggtggagactgaagtaggccaagctggcactgtagtaattctccttggaaattg  
ccctttttagtttgatcttqgttcatctcaagcctcagacagtggtcaaagtttttctccattcagggtgctgtagctagcccacc  
atgaccgagtacaagcccacgggtgcgctcgccaccgcgacgactccccgggcccgtacgcaacctgcgcccgcgcttcg  
ccgactaccccgccacgcgccacaccgtcgaccggaccgccaacatcgagcgggtaccgagctgcaagaactcttctcac  
gcgctcgggctcgacatcggcaaggtgtgggtcgcggacgacggcggcgggtggcggcttgaccacgcccggagagcgt  
cgaagcggggcggtgtcgcgagatcggcccgcgcatggccgagttgagcgggtcccggctggccgcgagcaacagatg  
gaaggcctcctggcggcaccggcccgaaggagcccgcgtggttctggccaccgtcggcgtctcggcccaccaccagggca  
aggtctgggagcggcgtgctccccggagtgaggcggcggagcgcggcgggggtgccgcttctggagacctccgc  
gccccgcaacctccccctcagagcggctcggctcaccgtcaccgcccagcgtcgaggtcccgaaggaccgagcactggg  
catgaccgcaagcccgggtcgggatcgggagagggcagaggaagtctgctaacatgcgggtgacgtcgaggagaatcctggc  
ccaccggtcggcaccagcagctgattaaggagaacatgcacatgaagctgtacatggaggccaccgtggacaaccatcactt  
caagtgcacatccgagggcgaaggcaagccctacgagggcaccagaccatgagaatcaaggtggtcagaggcggccctct  
cccctcgccttcgacatcctggctactagcttctctacggcagcaagacctcatcaaccaaccaggggcatccccgacttctc  
aagcagctcctccctgagggctcacaatgggagagagtcaccacatacgaagacgggggctgctgaccgctaccaggaca  
ccagcctccaggacggctgcctcatctacaacgtcaagatcagaggggtgaactcacaatccaacggccctgtgatgcagaaga  
aaacactcggctgggaggcctcaccgagacgctgtaccccgtgacggcggcctggaaggcagaaacgacatggccctgaa  
gctcgtgggcccggagccatctgatcgaaacatcaagaccacatagatccaagaaacccgtaagaacctcaagatgctg  
gctctactatgtggactacagactggaaagaatcaaggaggccaacaacgagacctacgtcgagcagcagcaggtggcagt  
ggccagatactgcgacctccctagcaaacctggggcacaagcttaataagaattcttagaggatccagacatgataagatacat  
tgatgagtttgacaaccacaactagaatgcagtgaaaaaatgctttatttgaaatttgatgctattgctttatttgaaccatta  
taagctgcaataaacaagttaacaacaacaattgcattcattttatgttcagggtcagggggaggtgtgggaggtttttaagcaag  
taaacctctacaatgtggtatggctgattatgatcctgcaagcctcgtcggcgggttattctgttgacaattaatcatggcatag  
tatatcggcatagtataatacgaacaaggtgaggaactaaacctgggatcggccattgaacaagatggattgcacgcaggttctc  
cggccgctgggtggagaggctattcggctatgactgggcacaacagacgatcggctgctctgatgccgcccgtgtccggctgtca

g c g c a g g g g c g c c c g g t t c t t t t g t c a a g a c c g a c c t g t c c g g t g c c c t g a a t g a a c t g c a g g a c g a g g c a g c g c g g c t a t c g t  
g g c t g g c c a c g a c g g g c g t t c c t t g c g c a g c t g t g c t c g a c g t t g t c a c t g a a g c g g a a g g g a c t g g c t g c t a t t g g g c g a a g t  
g c c g g g g c a g g a t c t c c t g t a t c t c a c c t t g t c c t g c c g a g a a a g t a t c c a t c a t g g c t g a t g c a a t g c g g c g g c t g c a t a c g c t  
t g a t c c g g c t a c c t g c c a t t c g a c c a c c a a g c g a a c a t c g c a t c g a g c g a c a c g t a c t c g g a t g g a a g c c g g t c t t g t c g a t  
c a g g a t g a t c t g g a c g a a g a g c a t c a g g g g t c g c g c c a g c c g a a c t g t t c g c c a g g c t a a g g c g c g a t g c c c g a c g g c g  
a g g a t c t c g t c g t g a c c c a t g g c g a t g c c t g c t t g c c g a a t a t c a t g g t g g a a a t g g c c g t t t t c g g a t t a t c g a c t g t g g c c g  
g c t g g t g t g g c g g a c c g t a t c a g g a c a t a g c g t t g g t a c c c g t g a t t g c t g a a g a g c t t g g c g g a a t g g g c t g a c c g c  
t t c c t g t g c t t a c g g t a t c g c c c c c g a t t c g c a g c a t c g c c t t a t c g c c t t t g a c g a g t t c t t g a g c g g g a c t c t g g g  
g t t c g a a t a a g a c c g a c c a a g c g a c g t c t g a g a c t c c c t g g c g a a t t c g g t a c c a t a a a a g a g c t t a t t t c a t g a t c t g t g t  
g t t g g t t t t g g c c g t t g c t g g c g t t t t c c a t a g g t c c g c c c c c t g a c g a g c a t c a c a a a a t c g a c g t c a a g t c a g a g g t g  
g c g a a c c c g a c a g g a c t a a a g a t a c c a g g c g t t c c c c t g g a a g t c c c c t g t g c t c t c t g t t c c g a c c c t g c c g c t t a  
c c g g a t a c c t g t c c g c t t t c c c t t c g g a a g c g t g g c g t t t c a t a g t c a c g c t g a g g t a t c a g t t c g g t g a g g t c g t t c g  
c t c c a a g c t g g g c t g t g c a c g a a c c c c c g t t c a g c c c g a c c g t g c g c t t a t c c g g t a a c t a t c g t t t g a g t c c a a c c c g g t  
a a g a c a c g a c t t a t c g c c a c t g g c a g c a g c c a c t g g t a a c a g g a t t a g c a g a g c g a g g t a t g t a g g c g g t g c t a c a g a g t t c t t  
g a a g t g g t g g c c t a a c t a c g g t a c a c t a g a a g a a c a g t a t t t g g t a t c t g c g t c t g t g a a g c c a g t t a c c t t c g g a a a a a g a g  
t t g g t a g c t t g a t c c g g c a a c a a a c c a c c g c t g g t a g c g g t g g t t t t t g t t g c a a g c a g c a g a t t a c g c g c a g a a a a a a g  
g a t c t c a a g a a g a t c c t t g a t c t t t t a g t g t c g

**attP-Puro donor DNA:**

g a t g c c a g c t a t t c t c c c a c t c a t g a t c t a t a g a t c c c c c g g g t g c a g g a a t t c t a c c c a c t c t g t c g a t a c c c a c c g a g a c c  
c c a t t g g g g c c a a t a c g c c c g t t t c t t c t t t c c c c a c c c c a a g t t c g g t g a a g g c c a g g g c t c g c a g c c a a c g  
t c g g g c g g c a a g c t t a c a t c g a g a t c c c g g t t g t c t g t c a a c c a c c g c g g t c a g t g g t g a c g g t a c a a a c c c g t g a g c  
a a g g g c g a g g a g c t g t c a c c g g g t g g t g c c c a t c c t g g t c g a g c t g g a c g g c g a c g t a a a c g g c c a a a g t c a g c g t g t c  
c g g c g a g g g c g a g g g c g a t g c c a c c t a c g g c a a g c t g a c c c t g a a g t t c a t c t g c a c c a c c g g c a a g c t g c c c g t g c c t g g  
c c c a c c c t g t g a c c a c c t g a c c a c g g c g t g c a g t g c t t a g c c g t a c c c c g a c c a t g a a g c a g c a c g a c t t c t t a a g t  
c c g c c a t g c c c g a a g g t a c g t c c a g g a g c g a c c a t t t c t t c a a g g a c g a c g g c a a c t a c a a g a c c c g c g c c g a g g t g a a  
g t t c g a g g g c g a c a c c c t g t g a a c c g a t c g a g c t g a a g g g c a t c g a c t t c a a g g a g g a c g g c a a c a t c c t g g g g c a a a g  
c t g g a g t a c a a c t a c a a c a g c c a c a a c g t c t a t a t c a t g g c c g a a g c a g a a a c g g c a t c a a g g t g a a c t t c a a g a t c c g  
c c a c a c a t c g a g g a c g g c a g c g t g c a g c t c g c c g a c c a t a c c a g c a g a a c a c c c c a t c g g c g a c g g c c c c g t g t g t  
g c c c g a c a a c c a c t a c c t g a g c a c c c a g t c c g c c t g a g c a a a g a c c c c a a c g a g a a g c g c g a t c a c a t g g t c t g t g g a g  
t t c g t g a c c g c c g c g g g a t c a c t c t c g g c a t g g a c g a g c t g t a c a a g a g c g g c c t g a g g a g c a g a g c c c a g g c g a g c a a c  
a g c g c c g t g g a c g c c a c c a t g g g c g a t c g c c c g g a a t t g a c t a g t g c g g c c c t a g g a t c c a t g c c g a t a g c g t t g t g a g  
t g g a t a a c c g t a t t a c c g c c a a g c t a t g c a t g t g c c c g t a g t g g c a g a g c g c a c a t c g c c c a c a g t c c c c g a g a a g t t g g g  
g g g a g g g t c g g c a a t t g a a c c g g t g c c t a g a a a g g t g g c g c g g g t a a a c t g g g a a g t g a t g t c g t g a c t g g c t c c g c c t  
t t t c c c g a g g t g g g g a g a a c c g t a t a a a g t g c a g t a g t c g c c g t g a a c g t t c t t t t c g c a a c g g g t t g c c c a g a a c a c a  
g g t a a g t c c g t g t g g t t c c c g c g g g c t g c c t t t t a c g g g t t a t g c c c t t g c g t c c t t g a a t t a c t t c c a c c t g g c t g c a g t a  
c g t a t t c t g a t c c c g a g c t t c g g g t t g a a g t g g t g g g a g a g t t c g a g g c c t t g c g c t t a a g g a g c c c t t c g c c t c g t g t t g a  
g t t g a g g c c t g g c c t g g g c g t g g g g c c g c c g c g a a t c t g t g c a c c t t c g c c c t g t c t c g t g c t t t c g a t a a g t c t a g  
c c a t t t a a a t t t t g a t g a c c t g c t g c g a c g c t t t t t c t g g c a a g a t a g t c t t g t a a a t g c g g g c c a a g a t c t g c a c a c t g g t a t t c g  
g t t t t g g g c c g c g g g c g g c a c g g g c c c g t g c g t c c c a g c g c a c a t g t t c g g c g a g g c g g g c c t g c g a g c g c g c c a c  
c g a g a a t c g g a c g g g g t a g t c t a a g c t g g c c g c c t g c t g t g t g c c t c g c g c c g c c g t g a t c g c c c g c c t g g g c  
g g c a a g g c t g g c c c g t g c g c a c c a g t t g c g t g a c g g a a a g a t g g c c g t t c c c g c c c t g c g a g g a g c t c a a a a t g g  
a g g a c g c g g c g t c g g g a g a g c g g g c g g t g a g t c a c c c a c a c a a a g g a a a a g g c c t t c c g t c c t a g c c g t c g t t c a t  
g t g a c t c c a c g g a g t a c c g g g c c c g t c c a g g c a c c t c g a t t a g t t c t c g c g c t t t g g a g t a c g t c g t c t t a g g t t g g g g g a g g  
g g t t t a t g c g a t g g a g t t c c c c a c a c t g a g t g g t g g a g a c t g a a g t t a g c c a g c t t g g c a c t t g a t g a a t t c c t t g g a a t t g  
c c t t t t g a g t t t g g a t c t t g g t t c a t t c t a a g c c t c a g a c a g t g g t t c a a a g t t t t t c t t c c a t t c a g g t g t c g t g a g c t a g c c a c c  
a t g a c c g a g t a c a a g c c c a c g g t g c g c c t g c c a c c c g c g a c g a c g t c c c c c g g g c g t a c g c a c c c t c g c c g c g t t c g  
c g a c t a c c c g c c a c g c c c a c a c c g t c g a c c c g a c c g c c a c a t c g a g c g g g t a c c g a g c t g c a a g a a c t t c t c t c a c  
g c g c t c g g g t c g a c a t c g g c a a g g t g g g t c g c g g a c g a c g g c c c g c g g t g g c g g t c t g g a c c a c g c c g g a g a g c g t



cgaagcggggcggtgtcgccgagatcggcccgcgcatggccgagttgagcgggtcccggctggccgcgagcaacagatg  
gaaggcctcctggcgcgcaccggcccaaggagcccgcgtggtcctggccaccgtcggcgtctcgcccgaccaccaggga  
aggtctgggagcgcctgctgctccccggagtgaggcggccgagcgcgcccgggtgccgcctcctggagacctcgc  
gccccgcaacctcccctctacgagcggctcggctcaccgtcaccgccgacgtcgaggtgcccgaaggaccgcgacctggg  
catgaccgcgaagcccgggtcgggatcgggagagggcagaggaagtctgctaacatgcggtgacgtcgaggagaatcctggc  
ccaccggtcgccaccagcgagctgattaaggagaacatgcacatgaagctgtacatggaggccaccgtggacaaccatcactt  
caagtgcacatccgagggcgaaggcaagccctacgagggcaccagaccatgagaatcaaggtggtcgagggcgccctct  
cccctcgccctcgacatcctggctactagcttctctacggcagcaagacctcatcaaccacaccaggggcatccccgacttctc  
aagcagtcctccctgagggcttcacatgggagagagtcaccacatacgaagacgggggctgctgaccgctaccaggaca  
ccagcctccaggacggctgcctcatctacaacgtcaagatcagaggggtgaactcacatccaacggccctgtgatgcagaaga  
aaacactcggctgggagggcctcaccgagacgtgtaccccgtgacggcggcctggaaggcagaaacgacatggccctgaa  
gctcgtgggcgggagccatctgatcgcaaacatcaagaccacatagatccaagaaaccgcctaagaacctcaagatgcctg  
gcttactatgtggactacagactggaaagaatcaaggaggccaacaacagacactacgtcgagcagcagcagggtggcagt  
ggccagatactgcgacctccttagcaaaactggggcacaagcttaataagaattcttagaggatccagacatgataagatacat  
tgatgagtttgacaaaccacaactagaatgcagtgaaaaaatgctttattgtgaaatttgatgctattgctttattgtaaccatta  
taagctgcaataaacaagtaacaacaacaattgcattcattttatgttcagggtcagggggaggtgtgggaggtttttaagcaag  
taaacctctacaaatgtggtatggctgattatgatcctgcaagcctcgtcgcgcccgggttattctgttgacaattaatcatcggcatag  
tatatcggcatagtataatacgaacaaggtaggaactaaaccatgggatcggccattgaacaagatggattgcacgcaggttctc  
cggccgctgggtggagaggctattcggctatgactgggcacaacagacgatcggctgctctgatgccgcccgtgtccggctgtca  
gcgaggggcgcccgggtctttttgtcaagaccgacctgctcgggtgccctgaatgaactgcaggacgaggcagcgcggctatcgt  
ggctggccacgacgggcgttcttctgagcagctgtgctcgcagctgtcactgaagcgggaagggactggctgctattgggcaagt  
gccggggcaggatctcctgtcatctcacctgtcctgcccagaaaagatccatcatggctgatgcaatgcggcggctgcatacgt  
tgatccggctacctgccattcgaccaccaagcgaacatcgcacgagcagcagcactcggatggaagccggtcttctgat  
caggatgatctggacgaagagcatcaggggctcgcgccagccgaactgttcgccaggctcaaggcgcgcatgcccagcggcg  
aggatctcgtcgtgacctatggcgtgctgcttgcgaatatcatggtggaatggccgctttctggattcatcactgtggccg  
gctgggtgtggcggaccgctatcaggacatagcgttggctacccgtgatattgctgaagagcttgccggcgaatgggctgaccgc  
ttcctcgtgctttacggatcgcgccccgattcgcagcgcacgccttctatgccttcttgacgagttcttctgagcgggactctggg  
gttcgaataaagaccgaccaagcgcagctctgagagctccctggcgaattcgggtaccaataaaagagctttatttcatgatctgtg  
gttggttttggccgcttctgctggcggttttccataggctccgccccctgacgagcatcacaataaagagctttatttcatgatctgtg  
gcaaacccgacaggactataaagataaccaggcgttccccctggaagctccctcgtcgcctcctgttccgacctgcccctta  
ccggatacctgtccgcttctccttcgggaagcgtggcgcttctcatagctcagcgttaggtatctcagttcgggttaggtcgttcg  
ctccaagctgggctgtgtgcacgaacccccgttcagcccagccgctgcgcttaccggtaactatcgttcttgatccaacccggt  
aagacacgacttatcgccactggcagcagccactggaacaggattagcagagcaggtatgtaggcggtgctacagagttctt  
gaagtgggtggcctaactacggctacactagaagaacagtattggatctcgcctctgctgaagccagttacctcggaaaaagag  
ttgtagctcttgatccggcaacaacaccgctggtagcgggtgggtttttgttgcaagcagcagattacgcgcagaaaaaag  
gatctcaagaagatccttgatctttctagtgtgcg

**attP Factor IX donor** (the vector backbone is pMC.BESPX-MCS1 from System Biosciences)

attP: highlighted in yellow

Factor IX intron 1: highlighted in grey

Factor IX exons 2-8 CDS: highlighted in green

Factor IX exon 8 3'UTR: underlined

bGH poly(A) signal: highlighted in cyan

AGGTTTGTCTGGTCAACCACCGCGGTCTCAGTGGTGTACGGTACAAACCTTTTCTTAAG  
AGATGTAAAATTTTCATGATGTTTTCTTTTTGCTAAAACCTAAAGAATTATTCTTTTACATT  
CAGTTTTTCTTGATCATGAAAACGCCAACAAAATTCTGAATCGGCCAAAGAGGTATAATT  
CAGGTAAATTGGAAGAGTTTGTTCAAGGGAACCTTGAGAGAGAATGTATGGAAGAAAAG  
TGAGTTTTGAAGAAGCACGAGAAGTTTTGAAAACACTGAAAGAACAACCTGAATTTTGG  
AAGCAGTATGTTGATGGAGATCAGTGTGAGTCCAATCCATGTTTAAATGGCGGCAGTTG  
CAAGGATGACATTAATTCCTATGAATGTTGGTGTCCCTTTGGATTTGAAGGAAAGAACTG  
TGAATTAGATGTAACATGTAACATTAAGAATGGCAGATGCGAGCAGTTTGTAAAAATAG  
TGCTGATAACAAGGTGGTTTGTCTCTGACTGAGGGATATCGACTTGCAGAAAACCCAGA  
AGTCCTGTGAACCAGCAGTGCCATTTCCATGTGGAAGAGTTTCTGTTTCACAACTTCTA  
AGCTCACCCGTGCTGAGACTGTTTTCTGATGTGGACTATGTAATTCTACTGAAGCTG  
AAACCATTTTGGATAACATCACTCAAAGCACCCAATCATTTAATGACTTCACTCGGGTTGT  
TGGTGGAGAAGATGCCAAACCAGGTCAATCCCTTGGCAGGTTGTTTTGAATGGTAAAG  
TTGATGCATTCTGTGGAGGCTCTATCGTTAATGAAAATGGATTGTAACCTGCTGCCACT  
GTGTTGAAACTGGTGTAAAATTACAGTTGTCGCAGGTGAACATAATATTGAGGAGACAG  
AACATACAGAGCAAAGCGAAATGTGATTGGAATTATTCTCACCACAACCTACAATGCAG  
CTATTAATAAGTACAACCATGACATTGCCCTTCTGGAAGTGGACGAACCCTTAGTGCTAA  
ACAGCTACGTTACACCTATTTGCATTGCTGACAAGGAATACACGAACATCTTCTCAAAT  
TTGGATCTGGCTATGTAAGTGGCTGGGGGAAGAGTCTTCCACAAAGGGAGATCAGCTTTA  
GTTCTTCAGTACCTTAGAGTTCCACTTGTGACCGAGCCACATGTCTTCGATCTACAAAG  
TTCACCATCTATAACAACATGTTCTGTGCTGGCTTCCATGAAGGAGGTAGAGATTCATGT  
CAAGGAGATAGTGGGGGACCCCATGTTACTGAAGTGAAGGGACCAGTTTCTTAACTGG  
AATTATTAGCTGGGGTGAAGAGTGTGCAATGAAAGGCAAATATGGAATATATAACCAAGGT  
ATCCCGGTATGTCAACTGGATTAAGGAAAAAACAAAGCTCACTTAATGAAAGATGGATTT  
CCAAGGTTAATTCATTGGAATTGAAAATTAACAGGGCCTCTCACTAACTAATCACTTTCCC  
ATCTTTTGTAGATTTGAATATATACATTCTATGATCATTGCTTTTTCTCTTTACAGGGGAG  
AATTTTCATATTTTACCTGAGCAAATTGATTAGAAAATGGAACCACTAGAGGAATATAATGT  
GTTAGGAAATTACAGTCATTTCTAAGGGCCCAGCCCTTGACAAAATTGTGAAGTTAAATT  
CTCCACTCTGTCCATCAGATACTATGGTTCTCCACTATGGCAACTAACTCACTCAATTTTC  
CCTCCTTAGCAGCATTCCATCTTCCCGATCTTCTTTGCTTCTCCAACCAAACATCAATGT  
TTATTAGTTCTGTATACAGTACAGGATCTTTGGTCTACTCTATCACAAGGCCAGTACCAC  
ACTCATGAAGAAAGAACACAGGAGTAGCTGAGAGGCTAAAACCTCATCAAAAACACTACT  
CCTTTTCTCTACCCTATTCCTCAATCTTTTACCTTTTCCAATCCCAATCCCCAAATCAG  
TTTTTCTCTTTCTTACTCCCTCTCTCCCTTTTACCCTCCATGGTCGTTAAAGGAGAGATGG  
GGAGCATCATTCTGTTATACTTCTGTACACAGTTATACATGTCTATCAAACCCAGACTTGC  
TTCCGTAGTGGAGACTTGCTTTTTCAGAACATAGGGATGAAGTAAGGTGCCTGAAAAGTTT  
GGGGGAAAAGTTTCTTTTCAGAGAGTTAAGTTATTTTATATATATAATATATATAAAAATAT  
ATAATATACAATATAAATATATAGTGTGTGTGTATGCGTGTGTGTAGACACACACGCATAC  
ACACATATAATGGAAGCAATAAGCCATTCTAAGAGCTTGTATGGTTATGGAGGTCTGACT  
AGGCATGATTTACGAAGGCAAGATTGGCATATCATTGTAACCTAAAAAGCTGACATTGA  
CCCAGACATATTGTAATCTTTCTAAAAATAATAATAATAATGCTAACAGAAAGAAGAGAAC

CGTTCGTTTGCAATCTACAGCTAGTAGAGACTTTGAGGAAGAATTCAACAGTGTGTCTTC  
AGCAGTGTTGAGAGCCAAGCAAGAAGTTGAAGTTGCCTAGACCAGAGGACATAAGTATC  
ATGTCTCCTTTAACTAGCATACCCCGAAGTGGAGAAGGGTGCAGCAGGCTCAAAGGCAT  
AAGTCATTCCAATCAGCCAATAAGTTGTCCTTTTCTGGTTTCGTGTTACCCATGGAACA  
TTTTGATTATAGTTAATCCTTCTATCTTGAATCTTCTAGAGAGTTGCTGACCAACTGACGT  
ATGTTTCCCTTTGTGAATTAATAAACTGGTGTCTGGTTCATCTGTGCCTTCTAGTTGCCA  
GCCATCTGTTGTTTGCCCCTCCCCGTGCCTTCCTTGACCCTGGAAGGTGCCACTCCCA  
CTGTCCTTTCCTAATAAAATGAGAAAATTGCATCGCATTGTCTGAGTAGGTGTCATTCTAT  
TCTGGGGGGTGGGGTGGGGCAGGACAGCAAGGGGGGAGGATTGGGAAGACAATAGCAG  
GCATGCTGGGGATGCGGTGGGCTCTATGG

## Supplementary Sequence 2. Sequence of codon-optimized Bxb1 plasmid

CMV enhancer/promoter: highlighted in grey

SP6 promoter: underlined

Codon-optimized Bxb1: highlighted in green

SV40 poly(A): highlighted in cyan

```
CGTTACATAACTTACGGTAAATGGCCCGCCTGGCTGACCGCCCAACGACCCCCGCCCA
TTGACGTCAATAATGACGTATGTTCCCATAGTAACGCCAATAGGGACTTTCATTGACGT
CAATGGGTGGAGTATTTACGGTAAACTGCCCACTTGGCAGTACATCAAGTGTATCATATG
CCAAGTACGCCCCCTATTGACGTCAATGACGGTAAATGGCCCGCCTGGCATTATGCCCA
GTACATGACCTTATGGGACTTTCCTACTTGGCAGTACATCTACGTATTAGTCATCGCTAT
TACCATGGTGATGCGGTTTTGGCAGTACATCAATGGGCGTGGATAGCGGTTTACTCAC
GGGGATTTCCAAGTCTCCACCCCAATTGACGTCAATGGGAGTTTGTGTTTGGCACCAAAT
CAACGGGACTTTCCAAAATGTCGTAACAACCTCCGCCCCATTGACGCAAATGGGCGGTAG
GCGTGTACGGTGGGAGGTCTATAAAGCAGAGCTCGTTTAGTGAACCGTCAGATCGCCT
GGAGGCGCCATCCACGCTGTTTTGACCTCCATAGAAGACACCGGGACCGATCCAGCCT
CCGGACTCTAGCCTAGGCTTTTGCAAAAAGCTATTTAGGTGACACTATAGAAGGTACGC
CTGCAGGTACCGGTCCGGAATTCGCCCTTATGATGCGGGCCCTGGTTGTGATTAGACTG
TCCAGAGTGACCGACGCCACCACCTCACCTGAGAGACAGTTGGAGAGCTGCCAGCAGC
TGTGCGCCCAGCGCGGCTGGGACGTGGTGGGCGTGGCCGAGGACCTGGACGTGTCCG
GCGCCGTGGACCCTTTGACCGGAAGCGGAGACCTAATCTGGCCAGATGGCTGGCCTT
CGAGGAACAGCCTTCGATGTGATCGTGGCCTACAGAGTGGACCGGCTGACCAGAAGC
ATCCGGCACCTGCAACAGCTGGTGCACCTGGGCCGAGGATCACAAAAGCTGGTGGTCT
CTGCTACAGAGGCCCACTTCGACACAACCACACCTTCGCCGCTGTGGTGTGATCGCCCTG
ATGGGGACCGTGGCCAGATGGAACCTCGAGGCCATCAAGGAACGGAACAGATCTGCCG
CCCACTTTAACATCAGAGCCGGCAAGTACAGAGGAAGCCTGCCACCTTGGGGCTACCT
GCCTACCAGAGTTGACGGCGAGTGGAGACTGGTCCCCGACCCCGTGCAGAGAGAGCG
GATCCTGGAGGTGTACCACAGAGTGGTCGACAACCACGAGCCCCTGCATCTGGTGGCT
CATGATCTGAATAGAAGGGGCGTGCTGAGCCCTAAAGACTACTTCGCTCAGCTGCAGG
GCAGAGAACCCAGGGCAGAGAGTGGAGCGCCACCGCCCTGAAGAGAAGCATGATCA
GCGAGGCCATGCTGGGATACGCCACCCTGAACGGCAAACCGTGCGGGACGATGATG
GAGCCCCTCTGGTGCGGGCAGAGCCTATCCTAACCCGCGAGCAGCTGGAAGCTCTGAG
AGCCGAGCTGGTCAAGACATCTAGAGCCAAACCTGCTGTGTCCACCCCTAGCCTGCTG
CTGCGGGTGCTGTTCTGTGCCGTGTGCGGTGAACCTGCTTATAAGTTCGCCGGCGGCG
GCAGAAAGCACCCAGATAACGGTGCAGATCTATGGGCTTCCCAAGCACTGTGGCAA
CGGCACCGTGGCCATGGCCGAGTGGGATGCTTTTTGCGAGGAACAAGTGCTGGACCTG
CTGGGCGATGCCGAAAGACTAGAGAAGGTGTGGGTGGCTGGCAGCGACAGCGCCGTG
GAACTGGCTGAAGTGAACGCCGAGCTGGTGGACCTACCAGCCTCATCGGAAGCCCGG
CCTACCGGGCCGGCTCTCCACAGAGAGAAGCCCTGGATGCCCGTATCGCCGCCCTGG
CCGCTAGGCAGGAGGAAGTGAAGGCCTGGAAGCCAGACCAAGCGGCTGGGAGTGA
GAGAGACAGGACAGCGGTTCCGAGATTGGTGGCGGGAACAGGATACAGCCGCAAAGA
ACACCTGGCTGAGAAGCATGAACGTGCGGCTGACATTCGACGTGAGAGGCGGACTGAC
CAGAACAATCGACTTCGGCGACCTGCAGGAGTACGAGCAACACCTGAGACTGGGCAGC
GTGGTTCGAGCGGCTGCACACAGGCATGAGCTAGAAGGGCGAATTCCCGGGTTCGACGA
GCTCACTAGCTTGGGATCTTTGTGAAGGAACCTTACTTCTGTGGTGTGACATAATTGGAC
AAACTACCTACAGAGATTTAAAGCTCTAAGGTAATATAAAAATTTTAAAGTGTATAATGTG
TTAAACTAGCTGCATATGCTTGCTGCTTGAGAGTTTTGCTTACTGAGTATGATTTATGAAA
ATATTATACACAGGAGCTAGTGATTCTAATTGTTTGTGTATTTTAGATTACAGTCCCAAG
```

GCTCATTT CAGGCCCT CAGTCCT CACAGTCT GTTCATG ATCATAAT CAGCCATA CCACA  
TTTGTAG AGGTTTTA CTTGCTTT AAAAAAC CTCCCAC ACCTCCCC CTGAACCT GAAACAT  
AAAATGA ATGCAATT GTTGTGTT AACTTGTT ATTGCAG CTTATAAT GGTTACAAATAA  
GCAATAG CATCACAA ATTTACAA ATAAGCAT TTTTTT CACTGCATT CTAGTTGTGGTT  
GTCCAAACT CATCAATGT ATCTTATCAT GTCTGGATC

**Supplementary Sequence 3.** Sequence of the lentiviral GFP reporter vector (the vector bone is pLVX-EF1a-IRES-Puro from Takara Bio inc.).

LTR: in bold

EF1 $\alpha$  promoter: underlined

AAVS1 target sequence: highlighted in yellow

Inverted H2B-EGFP coding sequence: highlighted in green

IRES: highlighted in grey

Puromycin resistance gene: highlighted in red

**tggaagggctaattcactcccaagaagacaagatatccttgatctgtggatctaccacacaaggctacttcctgat**  
**tagcagaactacaccagggccagggtcagatatccactgaccttgatggtgctacaagctagtagcagttgag**  
**ccagataaggtagaagaggccaataaaggagagaacaccagcttgttacaccctgtgagcctgcatgggatggatga**  
**cccggagagagaagtgttagagtggaggttgacagccgcttagcattcatcacgtggcccagagctgcatccgg**  
**agtactcaagaactgctgatatcgagcttgctacaagggactttccgctggggactttccaggaggcgtggcctggg**  
**cgggactggggagtggcgagccctcagatcctgcatataagcagctgcttttgcctgtactgggtctctgtgtagac**  
**cagatctgagcctgggagctctctggctaactagggaaaccactgcttaagcctcaataaagcttgcttgagtctca**  
**agtagtgtgcccgtctgtgtgactctggttaactagagatccctcagacccttttagtcagtggtgaaaatctctagc**  
**agtggcggcccgaacagggactgaaagcgaaagggaaaccagaggagctctctcgacgcaggactcggctgctgaagcgc**  
**gcacggcaagaggcgagggcgagctggtgagtacgcaaaaatttgactagcggaggctagaaggagagagatgggt**  
**gcgagagcgtcagtattaagcgggggagaattagatcgcgatgggaaaaaattcggttaaggccagggggaaagaaaaat**  
**ataaattaaacatatagtagggcaagcaggagctagaacgattcgcagttaatcctggcctgtagaaacatcagaaggctg**  
**tagacaaatactgggacagctacaaccatccctcagacaggatcagaagaacttagatcattatataatacagtagcaaccctct**  
**attgtgtcatcaaaggatagagataaaagacaccaaggaagcttttagacaagatagaggaagagcaaaacaaaagtaaga**  
**ccaccgcacagcaagcggccggcctgatctcagacctggaggaggagatagaggacaattggagaagtgaattatata**  
**aataaaagtagtaaaaattgaaccattaggagttagcaccaccaaggcaagagaagagtggtgcagagagaaaaaaga**  
**gcagtgggaataggagcttctcctgggtcttgggagcagcaggaagcactatgggagcagcgtcaatgacgctgacggtac**  
**aggccagacaattattgtctggtatagtgcagcagcagaacaatttctgagggtattgaggcgcaacagcatctgtgcaactc**  
**acagtctggggcatcaagcagctccaggcaagaatcctgctgtggaaagatacctaaaggatcaacagctcctggggattgg**  
**ggtgctctggaaaactcattgcaccactgctgtgccttggatgctagtggagtaataatctctggaacagattggaatcacac**  
**gacctggatggagtgggacagagaaattaacaattacacaagcttaatacactccttaattgaagaatcgcaaaaccagcaaga**  
**aaagaatgaacaagaattattggaattagataaatgggcaagtttggaattgggttaacatacaaaattggctgtggtatataaa**  
**attattcataatgatagtaggaggttgtaggttaagaatagttttgctgactttctatagtagaatagagtaggcagggatattcac**  
**cattatcgtttcagaccacctccaacccgaggggacccgacaggcccgaaggaatagaagaagaagggtggagagagag**  
**acagagacagatccattcgattagtgaacggatctcgacggtatcgcccttaaaagaaaaggggggattggggggtacagtga**  
**ggggaagaatagtagacataatagcaacagacatacaactaaagaattacaaaaacaaattcaaaaatttctg**  
**ggttattacagggacagcagagatccagttatcgatgagtaattcatacaaaaggactcggccctgccttggggaatcccaggg**  
**accgtcgttaaaactcccactaacgtagaaccagagatcgctgcgttcccggccccctcaccgcccgcctcgtcatcactgaggt**  
**ggagaagagcatgcgtgaggctccggtgccctcagtgggcagagcgcacatcgcccacagctccccgagaagtgggggga**  
**gggtcggcaattgaaccggtccttagagaaggtggcggggtaaaactgggaaagtgatgctgtactggctccgcttttcc**  
**cgaggggtgggggagaaccgtatataagtgcagtagtcggctgaacgttcttttcgcaacgggttggccgacagacaggtg**  
**agtccgtgtgtggttcccggggcctggcctctttacgggttatggcccttcgctgcctgaattactccacgcccctgctgcagta**  
**cgtgattcttgatcccagctcgggttgaagtgggtgggagagttcgaggccttgcgcttaaggagccccttcgctcgtgcttga**  
**gttggagcctggctggcgctggggccgctgcaaatctgggtggcaccttcgagcctgtctcgtgcttctcgataagtcttag**  
**ccatttaaattttgatgacctgctgcgacgctttttctggcaagatagcttqtaaatcggggccaagatctgcacactggtatttcg**  
**gttttggggccgaggcgagcggggccgctgctgcccagcgcacatgctcggcgaggcggggcctgcgagcgcggccac**  
**cgagaatcggacgggggtagtctcaagctggccggcctgctggtgctgctgcgcccggctgtatgccccgcccgtggc**  
**ggcaaggctggcccgtggcaccagttcgtgagcggaaagatggccgcttcccggcccctgctgcagggagctcaaaaatg**  
**aggacgcggcgtcgggagagcggggcgggtgagtcaccacacaaaggaaaaggccttccgtcctcagccgtcgttcat**

gtgactccacggagtaccgggcccgtccaggcacctcgattagttctcgagcttttgagtagcgtcgtctttaggtgggggagg  
ggtttatgcatggagtttccccacactgagtggtggagactgaagtagccagcttggcactgtagtaattctccttggaaattg  
cccttttgagttggatcttggctcattctcaagcctcagacagtggtcaaagtttttctccatttcagggtgctgtaggatctattccg  
gtgaattcAACGGGGCTCAGTCTGAAGAGCAGAGCCAGGAACCCCTGTAGGGAAGGGGCA  
GGAGAGCCAGGGGCATGAGATGGTGGACGAGGAAGGGGGACAGGGAAGCCTGAGCG  
CCTCTCCTGGGCTTGCCAAGGACTCAAACCCAGAAGCCCAGATTACTTGTACAGCTCGT  
CCATGCCGAGAGTGATCCCGGCGGGCGGTACGAACTCCAGCAGGACCATGTGATCGCG  
CTTCTCGTTGGGGTCTTTGCTCAGGGCGGACTGGGTGCTCAGGTAGTGGTTGTCGGGC  
AGCAGCACGGGGCCGTCGCCGATGGGGGTGTTCTGCTGGTAGTGGTCGGCGAGCTGC  
ACGCTGCCGTCTCGATGTTGTGGCGGATCTTGAAGTTCACCTTGATGCCGTTCTTCTG  
CTTGTGCGCCATGATATAGACGTTGTGGCTGTTGTAGTTGACTCCAGCTTGTGCCCA  
GGATGTTGCCGTCTCCTTGAAGTCGATGCCCTCAGCTCGATGCGGTTACCAGGGTG  
TCGCCCTCGAACTTCACCTCGGCGCGGGTCTTGTAGTTGCCGTCGTCCTTGAAGAAGAT  
GGTGCCTCCTGGACGTAGCCTTCGGGCATGGCGGACTTGAAGAAGTCGTGCTGCTTC  
ATGTGGTCGGGGTAGCGGCTGAAGCACTGCACGCCGTAGGTCAGGGTGGTCACGAGG  
GTGGGCCAGGGCACGGGCAGCTTGCCGGTGGTGCAGATGAACTTCAGGGTCAGCTTG  
CCGTAGGTGGCATCGCCCTCGCCCTCGCCGGACACGCTGAACTTGTGGCCGTTTACGT  
CGCCGTCCAGCTCGACCAGGATGGGCACCACCCCGGTGAACAGCTCCTCGCCCTTGT  
CACCATGGTGGCGACCGGTGGgTctTAGCGCTGGTGTACTTGGTGTATGGCCTTAGTAC  
CCTCGGACACGGCGTGCTTGGCCAACCTCCAGGCAGCAGCAGGCGCACGGCCGTCT  
GGATCTCCCTGGAGGTGATGGTTCGAGCGCTTGTGTAATGCGCCAGGCGGGAAGCCTC  
ACCTGCGATGCGCTCGAAAATGTCGTTCAAAAactATTCATGATGCCATGGCCTTGA  
CGAAATGCCGGTGTGAGGGTGGACCTGCTTCAGAACCTTGTACACATAGATGGAATAGC  
TCTCCTTGGCGCTGCGCTTGGCCTTCTTGGCCCTTTCTTCTGCGCCTTAGTCACCGCC  
TTCTTGGAGCCCTTTTTCGGGGCGGGAGCAGACTTCGCTGGCTCTGGCATgggtggcGGCC  
GCCGGGAAGTGCCGCTGGCCCCCACCGCCCAAGGATCTCCCGGTCCCCGCCCGGC  
GTGCTGACGTCACGGCGCTGCCCCAGGGTGTGCTGGGCAGGTCGCGGGGAGCGCTGG  
GAAATGGAGTCCATTAGCAGAAGTGGCCCTTGGCCACTTCCAGGAGTCGCTGTGCCCC  
GATGCACACTGGGAAGTCCGCAGCggatcccggcccctctccctccccccccctaacgttactggccgaagccg  
cttgaataaggccggtgtgctttgtctatatgttatttccaccatattgccgtctttggcaatgtgagggcccggaaacctggccct  
gtctcttgacgagcattcctaggggtcttcccctctcgccaaaggaatgcaaggtctgtgaatgctgtaggaagcagttcctct  
ggaagctcttgaagacaacaacgctctgtagcacccttgcaggcagcggaaacccccacctggcgacaggtgcctctgagg  
ccaaaagccacgtgtataagatacacctgcaaaggcggcacaaccccagtgccacggtgtgagttggatagttgtgaaagagt  
caaatggctctcctcaagcgtattcaacaaggggtgaaggatgccagaaggtacccattgtatggatctgatctggggcctc  
ggtgacatgctttacatgtgttagtcgaggttaaaaaaacgtctaggccccccgaaccacggggacgtggttttcttgaaaaa  
cacgatgataagcttgcacaaccacaaggagacgacctccatgaccgagtagcaagcccacgggtgctcctcgccaccggc  
gacgagctccccgggcccgtacgcaccctcgccgcccgttcgcccactaccccgccacgcccacaccgtcgacccggacc  
gccacatcgagcgggtcaccgagctgcaagaactctctcagcgcgctcgggctcgacatcggaaggtgtgggtcgccgac  
gacggcgcggcggtggcggtctggaccacgcccggagagcgtcgaagcggggcggtgtcgcggagatcgggcccgcgatg  
gccgagttgagcgggtcccggctggccgagcaacagatggaaggcctcctggcggcaccggcccaaggagcccgcg  
tggttctggccaccgtcggcgtctcggccgaccaccagggcaagggctcgggcagcggctgctcctccggagtgaggc  
ggccgagcgcgcccgggtcccgccttctggagacctccgcgccccgcaacctccccttctacgagcggctcggcttaccgt  
caccgcccagctcgaggtcccgaaggaccgagcactggtgcatgaccgcaagcccgggtgcttagacgctctggaaca  
atcaacctctggattacaaaattgtgaaagattgactggtattcttaactatgttgctcctttacgctatgtggatacgtgcttfaatgc  
ctttgatcatgctattgcttcccgtatggcttcttctcctctgtataaatcctgggtgctgctctttatgaggagttgtggcccgtgtc  
aggcaacgtggcgtgggtgtgactgtgttctgacgcaacccccactggtggggcattgccaccacctgtcagctcctttccggg  
acttctgcttccccctccctattgccacggcggaaactcatcgccgctgcttggccgctgctggacaggggctcggctgtgggca  
ctgacaattccgtgggtgtcggggaagctgacgtccttccatggctgctcgcctgtgttccacctggattctcgcgggacgtcct  
tctgtacgtccctcggccctcaatccagcggaccttctcccggcctgctgcccgtctgcccctcttccgctctcgccttc

gccctcagacgagtcggatctcccttgggcccgcctccccgcctggaattaattctgcagtcgagacctagaaaaacatggagca  
atcacaagtagcaatacagcagctaccaatgctgattgtcctggctagaagcacaagaggaggagggtgggtttccagtc  
acacctcaggtaccttaagaccaatgacttacaaggcagctgtagatcttagccacttttaaaagaaaagaggggactggaag  
**ggctaattcactcccaacgaagacaagataccttgatctgtggatctaccacacacaaggctacttccctgattagcag**  
**aactacacaccagggccaggggtcagatatccactgaccttggatgggtgctacaagctagtaccagttgagccagat**  
**aaggtagaagaggccaataaaggagagaacaccagcttgttacaccctgtgagcctgcatgggatggatgaccgg**  
**agagagaagtgttagagtggaggttgacagccgcctagcattcatcacgtggcccgagagctgcatccggagtactt**  
**caagaactgctgatatcgagcttctacaagggactttccgctggggactttccagggaggcgtggcctgggaggac**  
**tggggagtggcgagccctcagatcctgcatataagcagctgcttttgcctgtactgggtctctctggttagaccagatct**  
**gagcctgggagctctctggctaactaggaaccactgcttaagcctcaataaagcttgccttgagtgttcaagtagtg**  
**tgtgccgctctgtgtgactctggtactagagatccctcagacccttttagtcagtggtgaaaatctctagcagtagtag**  
ttcatgtcatcttattttagtattataacttgcaagaaatgaatatcagagagtgagaggccttgacattgctagcgtttaccgctg  
accttagctagagcttggcgtaatcatggtcatagctgttccctgtgtgaaattgttatccgctcacaattccacacaacatacagagc  
cggaagcataaagtgtaaagcctgggggtgcctaataagtgagtaactcacattaattgctgtgctcactgcccgtttccagtc  
gggaaacctgtcgtgccagctgattaatgaatcgcccaacgcgccccgagaggcggttgcgtattgggcgctcttccgcttct  
cgctcactgactcgtcgcctcggctcggctgcggcgagcggatcagctcactcaaggcggtaatacgggtatccacagaa  
tcaggggataacgcaggaaagaacatgtgagcaaaaggccagcaaaaggccaggaaccgtaaaaaggccgctgtgtggc  
gttttccataggctccgccccctgacgagcatcacaataatcgacgctcaagtcagaggtggcgaaaccggacaggactata  
aagataccaggcgtttccccctggaagctccctcgtgctctcctgttccgacctgcccgttaccggatacctgtccgctttctcc  
cttcgggaagcgtggcgcttctcatagctcacgctgtaggtatctcagttcgggtgtaggtcgttcgctccaagctgggctgtgtcac  
gaacccccgctcagcccgaccgctgcgccttatccgtaactatcgtcttgagccaaccggtaagacacgacttatcgccact  
ggcagcagccactggtaacaggattagcagagcgaggtatgtaggcgggtgctacagagttctgaagtgggtggcctaactcgg  
ctacactagaagaacagtatgttggatctcgcctcgtgaagccagttaccttcggaaaaagagttggtagctcttgatccggcaa  
acaaaccaccgctggtagcgggtggtttttgtttgcaagcagcagattacgcgcagaaaaaaggatctcaagaagatcctttgat  
ctttctacggggtcgtacgctcagtggaacgaaaactcacgtaagggtttggtcatgagattatcaaaaaggatcttcacctag  
atccttttaataaaaaatgaagtttaaatcaatctaaagtataatgagtaaactggctcagagttaccaatgcttaatcagtgagg  
cacctatctcagcgtatctgtctatttcgctcatccatagttgctgactccccgctgtagataactacgatacgggagggttaccat  
ctggccccagtgctgcaatgataccgcgagaccacgctcaccggctccagattatcagcaataaaccagccagccggaagg  
gccgagcgcagaagtggctcctgcaactttatccgctccatccagctattaattgttggcgggaagctagagtaagtagttcgcca  
gttaatagtttgcgcaacggtgtgcatgctacaggcatcgtggtgtcacgctcgtcgttggatggcttattcagctccggttcca  
acgatcaaggcaggttacatgatccccatgtgtgcaaaaaagcggttagctcctcggctcctccgatcgttgcagaagtaagttg  
gccgagtggtatcactcatggttatggcagcactgcataattcttactgtcatgccatccgtaagatgcttttctgtgactggtagta  
ctcaaccaagtcattctgagaatagtgatgctggcgaccgagttgctcttggccgctcaatacgggataataccgcgccacata  
gcagaactttaaagtgctcatcattgaaaacgcttctcggggcgaaaactctcaaggatcttaccgctgttgagatccagttcgat  
gtaaccactcgtgcacccaactgatcttcagcatctttactttaccagcgttctgggtgagcaaaaacaggaaggcaaaatgc  
cgcaaaaaagggaataaggcgacacggaaatgtgaatactcactcttcttttcaatattattgaagcatttatcagggttatt  
gtctcatgagcggatacatattgaatgtatttagaaaaataaacaataggggtccgcgcacatttccccgaaaagtgccacctg  
acgtcgacggatcgggagatcaactgtttattgacgttataatggttacaataaagcaatagcatcacaatttcacaaataaa  
gcatttttactgcattctagtgtgtgtttgtccaaactcatcaatgtatcttatcatgtctggatcaactggataactcaagctaacca  
aatcatcccaaaacttccaccccataccctattaccactgccaattaccctgtggttcttactctaaacctgtgattcctctgaattatt  
tcattttaaagaaattgtattgttaaataatgtactacaaacttagtagt



## Supplementary References

- 1 Choi, J. *et al.* Precise genomic deletions using paired prime editing. *Nat Biotechnol*, doi:10.1038/s41587-021-01025-z (2021).
- 2 Bolukbasi, M. F. *et al.* Orthogonal Cas9–Cas9 chimeras provide a versatile platform for genome editing. *Nature Communications* **9**, 4856, doi:10.1038/s41467-018-07310-x (2018).
- 3 Kim, H. K. *et al.* SpCas9 activity prediction by DeepSpCas9, a deep learning-based model with high generalization performance. *Science Advances* **5**, eaax9249, doi:doi:10.1126/sciadv.aax9249 (2019).
- 4 Lin, Q. *et al.* High-efficiency prime editing with optimized, paired pegRNAs in plants. *Nature Biotechnology*, doi:10.1038/s41587-021-00868-w (2021).
- 5 Guha, T. K. & Calos, M. P. Nucleofection of phiC31 Integrase Protein Mediates Sequence-Specific Genomic Integration in Human Cells. *J Mol Biol* **432**, 3950-3955, doi:10.1016/j.jmb.2020.04.019 (2020).
- 6 Gaj, T., Mercer, A. C., Sirk, S. J., Smith, H. L. & Barbas, C. F., 3rd. A comprehensive approach to zinc-finger recombinase customization enables genomic targeting in human cells. *Nucleic acids research* **41**, 3937-3946, doi:10.1093/nar/gkt071 (2013).
- 7 Chaikind, B., Bessen, J. L., Thompson, D. B., Hu, J. H. & Liu, D. R. A programmable Cas9-serine recombinase fusion protein that operates on DNA sequences in mammalian cells. *Nucleic Acids Res* **44**, 9758-9770, doi:10.1093/nar/gkw707 (2016).
- 8 Gaj, T. *et al.* Enhancing the Specificity of Recombinase-Mediated Genome Engineering through Dimer Interface Redesign. *J Am Chem Soc* **136**, 5047-5056, doi:10.1021/ja4130059 (2014).
- 9 Mercer, A. C., Gaj, T., Fuller, R. P. & Barbas, C. F., 3rd. Chimeric TALE recombinases with programmable DNA sequence specificity. *Nucleic Acids Res* **40**, 11163-11172, doi:10.1093/nar/gks875 (2012).
- 10 Pawelczak, K. S., Gavande, N. S., VanderVere-Carozza, P. S. & Turchi, J. J. Modulating DNA Repair Pathways to Improve Precision Genome Engineering. *ACS Chem Biol* **13**, 389-396, doi:10.1021/acscchembio.7b00777 (2018).
- 11 Brunet, E. & Jasin, M. Induction of Chromosomal Translocations with CRISPR-Cas9 and Other Nucleases: Understanding the Repair Mechanisms That Give Rise to Translocations. *Advances in experimental medicine and biology* **1044**, 15-25, doi:10.1007/978-981-13-0593-1\_2 (2018).
- 12 Leibowitz, M. L. *et al.* Chromothripsis as an on-target consequence of CRISPR–Cas9 genome editing. *Nature Genetics*, doi:10.1038/s41588-021-00838-7 (2021).
- 13 Kosicki, M., Tomberg, K. & Bradley, A. Repair of double-strand breaks induced by CRISPR–Cas9 leads to large deletions and complex rearrangements. *Nature Biotechnology* **36**, 765-771, doi:10.1038/nbt.4192 (2018).
- 14 Alanis-Lobato, G. *et al.* Frequent loss-of-heterozygosity in CRISPR-Cas9–edited early human embryos. *Proceedings of the National Academy of Sciences*, 202004832, doi:10.1073/pnas.2004832117 (2021).
- 15 Song, Y. *et al.* Large-Fragment Deletions Induced by Cas9 Cleavage while Not in the BEs System. *Molecular Therapy - Nucleic Acids* **21**, 523-526, doi:10.1016/j.omtn.2020.06.019 (2020).
- 16 Haapaniemi, E., Botla, S., Persson, J., Schmierer, B. & Taipale, J. CRISPR–Cas9 genome editing induces a p53-mediated DNA damage response. *Nature Medicine* **24**, 927-930, doi:10.1038/s41591-018-0049-z (2018).

- 17 Ihry, R. J. *et al.* p53 inhibits CRISPR–Cas9 engineering in human pluripotent stem cells. *Nature Medicine* **24**, 939-946, doi:10.1038/s41591-018-0050-6 (2018).
- 18 Enache, O. M. *et al.* Cas9 activates the p53 pathway and selects for p53-inactivating mutations. *Nat Genet* **52**, 662-668, doi:10.1038/s41588-020-0623-4 (2020).
- 19 Ghosh, P., Kim, A. I. & Hatfull, G. F. The Orientation of Mycobacteriophage Bxb1 Integration Is Solely Dependent on the Central Dinucleotide of attP and attB. *Molecular Cell* **12**, 1101-1111, doi:10.1016/S1097-2765(03)00444-1 (2003).
- 20 Suzuki, K. *et al.* In vivo genome editing via CRISPR/Cas9 mediated homology-independent targeted integration. *Nature* **540**, 144-149, doi:10.1038/nature20565 (2016).
- 21 Ruan, J. *et al.* Highly efficient CRISPR/Cas9-mediated transgene knockin at the H11 locus in pigs. *Scientific Reports* **5**, 14253, doi:10.1038/srep14253 (2015).
- 22 Chu, V. T. *et al.* Increasing the efficiency of homology-directed repair for CRISPR-Cas9-induced precise gene editing in mammalian cells. *Nature Biotechnology* **33**, 543-548, doi:10.1038/nbt.3198 (2015).
- 23 Zhang, J.-P. *et al.* Efficient precise knockin with a double cut HDR donor after CRISPR/Cas9-mediated double-stranded DNA cleavage. *Genome Biology* **18**, 35, doi:10.1186/s13059-017-1164-8 (2017).
- 24 Brnzei, D. & Foiani, M. Regulation of DNA repair throughout the cell cycle. *Nature Reviews Molecular Cell Biology* **9**, 297-308, doi:10.1038/nrm2351 (2008).
- 25 Heyer, W. D., Ehmsen, K. T. & Liu, J. Regulation of homologous recombination in eukaryotes. *Annual review of genetics* **44**, 113-139, doi:10.1146/annurev-genet-051710-150955 (2010).
- 26 Chen, X. *et al.* In trans paired nicking triggers seamless genome editing without double-stranded DNA cutting. *Nat Commun* **8**, 657, doi:10.1038/s41467-017-00687-1 (2017).
- 27 Hyodo, T. *et al.* Tandem Paired Nicking Promotes Precise Genome Editing with Scarce Interference by p53. *Cell Reports* **30**, 1195-1207.e1197, doi:<https://doi.org/10.1016/j.celrep.2019.12.064> (2020).
